# Supplementary material for: Dietary analysis of an uncharacteristic population of the Mountain Pygmy-possum (Burramys parvus) in the Kosciuszko National Park, New South Wales, Australia
Source: PeerJ. 2019 Jan 24;7:e6307. doi: 10.7717/peerj.6307 (PMC6348096; doi:10.7717/peerj.6307)
Supplement: Supplemental Information 1 — Raw data for dietary analysis of B. parvus in Kosciuszko National Park. [file peerj-07-6307-s001.xlsx]

## Sheet: population_comparison
slide	location	site	population	elevation	day	month	year	season	rainfall	trap np	id	Sex	Age	walnut	coleoptera	Plant sp1	araneae	chilopoda	lepidoptera larvae	lepidoptera	d.tas	a.montanus fruit	local.invert	diplopoda	orthoptera	p.ligustrina	p.lawrencei	plant.other	plant sp 4 seed	plat sp 4 fruit	plant sp2	plant sp3	alpine celery	opilions
TA1	north	snow	srh	1488.5	20	10	2013	spring	above	A6	5140	F	A	Y	0	0.6	0	0	0	0	0	0	0	0	0	0	0	0.2	0	0	0	0	0	0
TA10	north	snow	srh	1488.5	21	10	2013	spring	above	C20	5574	M	J	Y	0	0.2	0.1	0	0	0.2	0	0	0.2	0	0	0	0	0.1	0	0	0	0	0	0
TA100	north	hjs	spoil	1225	11	4	2013	autumn	above	HJ19		F	A	Y	0	0	0	0	0	0	0.3	0	0	0	0.1	0	0	0	0	0	0	0	0	0
TA101	north	hjs	l screen	1225	17	4	2013	autumn	above	HJ35		F	J	Y	0	0	0	0	0	0	0	0	0	0	0	0	0	0	0	0	0	0	0	0
TA102	north	hjs	l screen	1225	17	4	2013	autumn	above	HJ35		F	J	Y	0	0	1	0	0	0	0	0	0	0	0	0	0	0	0	0	0	0	0	0
TA103	north	hjs	l screen	1225	13	4	2013	autumn	above	HJ35		F	J	Y	0	0	0	0	0	0	0	0	0	0	0	0	0	0	0	0	0	0	0	0
TA11	north	snow	srh	1488.5	25	1	2011	spring	above	B12	4532	M		OIL	0	0	0.2	0	0	0.1	0	0	0.2	0.1	0.1	0	0	0.2	0	0	0	0	0	0
TA12	north	snow	srh	1488.5	25	1	2011	spring	above	A17	4555	F	J	OIL	0	0	0	0	0.1	0.2	0	0	0.5	0	0	0	0	0	0	0	0	0	0	0
TA13	north	snow	srh	1488.5	25	1	2011	spring	above	A39	4414	M	J	OIL	0	0	0	0	0	0	0	0	0.4	0.2	0	0	0	0	0	0	0	0	0	0
TA14	north	snow	srh	1488.5	25	1	2011	spring	above	B41	4546	F	J	OIL	0	0	0	0	0.3	0	0	0	0	0	0	0	0	0.5	0	0	0	0	0	0
TA16	north	bh		1514.5	25	10	2012	spring	above	A53	4709	F			0	0	0.2	0.1	0	0	0	0	0.1	0	0	0	0	0	0	0	0	0	0	0
TA17	north	bh		1514.5	25	10	2012	spring	above	A52	4661	F			0	0	0	0	0	0.1	0	0	0.1	0	0	0	0	0.1	0	0	0	0	0	0
TA18	north	bh		1514.5	24	10	2012	spring	above	A37	5506	F		Y	0	0	0	0	0	0	0	0	0.1	0	0	0	0	0	0	0	0	0	0	0
TA19	north	bh		1514.5	23	10	2012	spring	above	A23	4696	F			0	0	0.2	0	0	0.1	0	0	0.2	0	0	0	0	0.1	0.2	0.1	0	0	0	0
TA2	north	snow	srh	1488.5	20	10	2013	spring	above	B40	4512	F		Y	0	0	0	0.6	0	0.4	0	0	0	0	0	0	0	0	0	0	0	0	0	0
TA20	north	bh		1514.5	24	10	2012	spring	above	A49	5543	F			0	0	0	0	0	0	0	0	0	0	0	0	0	0.2	0.8	0.2	0	0	0	0
TA204	north	hjs		1225	12	3	2013	autumn	above	HJ19	D2D71	F			0	0	0	0	0	0	0	0	0	0	0	0	0	0	0	0	0	0	0	0
TA205	north	hjs	T33	1225	12	3	2013	autumn	above	HJ19	DA0CC	F			0	0	0	0	0	0	0.3	0	0	0	0	0	0	0	0	0	0	0	0	0
TA206	north	hjs	SD3	1225	13	2	2013	summer	above	16	D2A85	M	J	Y	0.1	0	0	0	0	0	0.5	0	0	0	0	0	0	0	0	0	0	0	0	0
TA207	north	hjs	T21	1225	13	2	2013	summer	above	HJ19	DA42A	M	J		0.1	0	0	0	0.2	0	0.1	0	0.2	0	0	0	0	0	0.4	0	0	0	0	0
TA208	north	hjs	T43	1225	11	3	2013	autumn	above	SD4	D210A	F	J		0	0	0	0	0	0	0.3	0	0.2	0	0	0	0	0.1	0.2	0.1	0	0	0	0
TA209	north	hjs	T40	1225	13	3	2013	autumn	above	HJ19	D8E9C	F	J	Y	0	0	0	0	0	0	0	0	0	0	0	0	0	0	0	0	0	0	0	0
TA21	north	bh		1514.5	24	10	2012	spring	above	A37	5502	F		Y	0	0	0	0	0	0	0	0	0.1	0	0	0	0	0	0.1	0	0	0	0	0
TA210	north	hjs	T10	1225	14	3	2013	autumn	above	HJ35	D4EFF	F	J		0	0	0	0	0.7	0	0	0	0	0	0	0	0	0.2	0.1	0.2	0	0	0	0
TA211	north	hjs	T50	1225	11	3	2013	autumn	above	SD4	DAE80	F	J		0.3	0	0.2	0	0	0	0	0	0.3	0	0	0	0	0	0	0	0	0	0	0.2
TA212	north	hjs	T21	1225	11	3	2013	autumn	above	SD4	D2478	F	A		0	0	0	0	0	0	0.2	0	0	0	0	0	0	0.4	0.5	0.4	0	0	0	0
TA213	north	hjs	T48	1225	12	3	2013	autumn	above	HJ19		F	A		0	0	0.1	0	0	0	0.2	0	0.4	0	0.1	0	0	0.1	0	0.1	0	0	0	0
TA214	north	hjs	T27	1225	12	3	2013	autumn	above	HJ35		F	A		0	0	0	0	0	0	0	0	0	0	0	0	0	0	0	0	0	0	0	0
TA215	north	hjs	T18	1225	14	3	2013	autumn	above	HJ35	D235C	F	J		0	0	0	0	0	0	1	0	0	0	0	0	0	0	0	0	0	0	0	0
TA216	north	hjs	T32	1225	14	3	2013	autumn	above	HJ35	DA662	F	A		0	0	0	0	0	0	0.6	0	0	0	0	0	0	0	0	0	0	0	0	0
TA217	north	hjs	T47	1225	11	3	2013	autumn	above	SD4	DD3B2	F	A		0.1	0	0	0	0	0	0.5	0	0	0	0	0	0	0.3	0	0.3	0	0	0	0
TA218	north	hjs	large screen	1225	23	11	2012	spring	above	HJ46	49B9	F		Y	0.1	0	0.3	0	0.1	0.1	0	0	0.2	0	0	0	0	0	0	0	0	0	0	0.1
TA219	north	hjs	above sd	1225	24	11	2012	spring	above	HJ19	4508	M		Y	0	0	0	0	0	0	0	0	0.2	0	0	0	0	0.5	0.3	0.3	0	0	0	0
TA22	north	bh		1514.5	24	10	2012	spring	above	A36	4620	F		Y	0	0	0	0.1	0	0.2	0	0	0.1	0	0.1	0	0	0	0	0	0	0	0	0
TA220	north	hjs	sd4	1225	24	11	2012	spring	above	HJ19	BP10	F		Y	0.2	0	0	0	0.2	0.4	0	0	0.1	0	0	0	0	0.1	0	0.1	0	0	0	0
TA221	north	hjs	large screen	1225	21	11	2012	spring	above	HJ47	DB4FD	F		Y	0.3	0	0	0	0	0.4	0	0	0.2	0	0	0	0	0	0	0	0	0	0	0
TA222	north	hjs	large screen	1225	21	11	2012	spring	above	HJ46	D51AA	F	A	Y	0.2	0	0.1	0	0	0.2	0.1	0	0.1	0	0	0	0	0	0	0	0	0	0	0
TA223	north	hjs	large screen	1225	21	11	2012	spring	above	HJ46	4786	M	A	Y	0	0	0	0	0	0	0	0	0	0	0	0	0	0	0	0	0	0	0	0
TA224	north	hjs		1225	21	11	2012	spring	above	HJ35	4970	F	J	Y	0.2	0	0	0	0	0.2	0	0	0.2	0	0.1	0	0	0.3	0	0	0	0	0	0
TA225	north	hjs		1225	23	11	2012	spring	above	hj35				Y	0	0	0	0	0	0	0.1	0	0	0	0	0	0	0	0	0	0	0	0	0.3
TA226	north	hjs		1225	21	11	2012	spring	above	HJ35	4805	M		Y	0	0	0	0	0	0.1	0.1	0	0.1	0	0	0	0	0	0	0	0	0	0	0.1
TA227	north	hjs	large screen	1225	21	11	2012	spring	above	HJ27	4597	F		Y	0	0	0	0	0.2	0.7	0	0	0	0	0.1	0	0	0	0	0	0	0	0	0
TA228	north	hjs	large screen	1225	21	11	2012	spring	above	HJ27	D3252	F		Y	0.9	0	0	0	0.1	0	0	0	0	0	0	0	0	0	0	0	0	0	0	0
TA229	north	hjs	s end	1225	24	11	2012	spring	above	SD4	D94C9	F		Y	0	0	0	0	0	0.1	0	0	0.1	0	0	0	0	0.2	0	0	0	0	0	0
TA23	north	bh		1514.5	23	10	2012	spring	above	A6	4718			Y	0	0	0	0.2	0	0.2	0.1	0	0.1	0	0	0	0	0	0	0	0	0	0	0
TA230	north	hjs		1225	21	11	2012	spring	above	HJ35		M		Y	0	0	0.2	0	0	0.1	0.1	0	0.2	0	0	0	0	0	0	0	0	0	0	0
TA231	north	hjs	rce	1225	29	10	2011	spring	above	2A		F	J	Y	0.2	0	0.1	0	0	0	0	0	0.4	0	0	0	0	0	0	0	0	0	0	0
TA232	north	hjs	rce	1225	29	10	2011	spring	above	A8		F	J	Y	0	0	0	0	0.2	0	0.2	0	0	0	0	0.3	0	0	0	0	0	0	0	0
TA233	north	hjs	rcw	1225	29	10	2011	spring	above	11	4832				0.2	0	0.3	0	0.1	0.1	0	0	0	0	0	0.1	0	0	0	0	0	0	0	0.2
TA234	north	hjs		1225	29	10	2011	spring	above	C20		F	J	Y	0.3	0	0	0	0	0	0	0	0.3	0	0	0	0	0.2	0	0	0	0	0	0
TA235	north	hjs		1225	29	10	2011	spring	above	C4		F	A	Y	0	0	0.6	0	0	0	0.3	0	0	0	0.1	0	0	0	0	0	0	0	0	0
TA236	north	hjs	rce	1225	29	10	2011	spring	above	A9		F	A	Y	0	0	0.3	0	0.3	0	0.1	0	0.2	0	0	0	0	0	0	0	0	0	0	0
TA237	north	hjs	rce	1225	28	10	2011	spring	above	18	4791	F	A	Y	0	0	0	0	0	0	0	0	0	0	0	0	0	0	0	0	0	0	0	0
TA238	north	hjs	rce	1225	28	10	2011	spring	above	24	4835	F	J	Y	0	0	0	0	0	0	0.1	0	0	0	0	0	0	0	0	0	0	0	0	0
TA239	north	hjs	rcw	1225	29	10	2011	spring	above	16	4833	M	A	Y	0.1	0	0	0	0.3	0	0.1	0	0.2	0	0	0.2	0	0	0	0	0	0	0	0
TA24	north	bh		1514.5	24	10	2012	spring	above	C5	5508	F		Y	0	0	0	0	0	0	0.1	0	0	0	0	0	0	0	0	0	0	0	0	0
TA240	north	hjs	rce	1225	28	10	2011	spring	above	30	4803	F	J	Y	0	0	0	0	0	0	0	0	0	0	0	0	0	0	0	0	0	0	0	0
TA241	north	hjs		1225	22	11	2014	spring	below	HJ26	D26F8	F	A		0.1	0	0.7	0	0	0	0	0	0	0	0	0	0	0.2	0	0	0	0	0	0
TA242	north	hjs		1225	24	11	2014	spring	below	HJ35	D1C75	M			0.3	0	0	0	0	0	0	0	0.1	0	0	0	0	0	0	0	0	0	0	0
TA243	north	hjs		1225	25	11	2014	spring	below	HJ35	D225D	F	J		0	0	0	0	0	0	0	0	0.2	0	0	0	0	0	0	0	0	0	0	0
TA244	north	hjs		1225	24	11	2014	spring	below	HJ35	DA5AE	M	J		0	0	0	0	0	0	0	0	0	0	0	0	0	0.1	0	0	0	0	0	0
TA245	north	hjs		1225	24	11	2014	spring	below	HJ35	DA816	F	A		0.6	0	0	0	0	0	0	0	0	0	0	0	0	0	0	0	0.1	0	0	0.3
TA246	north	hjs		1225	22	11	2013	spring	below	HJ35	D37B6	F	A		0.1	0	0	0	0	0.1	0	0	0.3	0	0	0	0	0.2	0.3	0.2	0	0	0	0
TA247	north	hjs		1225	23	11	2014	spring	below	HJ26	D26F8	F	A		0.3	0	0.4	0	0	0	0	0	0.2	0	0.1	0	0	0	0	0	0	0	0	0
TA248	north	hjs		1225	24	11	2014	spring	below	HJ35	D1F15	F	A		0	0	0	0.3	0	0	0	0	0	0	0	0	0	0	0	0	0	0	0	0
TA249	north	hjs		1225	22	11	2014	spring	below	HJ35	D1C75	M			0	0	0.4	0	0	0.6	0	0	0	0	0	0	0	0	0	0	0	0	0	0
TA25	north	bh		1514.5	25	10	2012	spring	above	C12	5535	M		Y	0	0.1	0	0.2	0	0.5	0.1	0	0	0	0	0	0	0	0	0	0	0	0	0
TA250	north	rc	rce	1617	1	11	2014	spring	below		5564	M	A	Y	0	0	0	0	0	0.2	0.1	0	0	0	0	0	0	0	0	0	0	0	0	0
TA251	north	rc	rce	1617	30	10	2014	spring	below	T17	5571	F	A	Y	0	0	0	0	0	0.3	0	0	0	0.1	0	0	0	0.1	0	0	0	0	0	0
TA252	north	rc	rce	1617	30	10	2014	spring	below	T25	5537	F	J	Y	0	0	0.3	0	0.1	0.1	0	0	0	0	0	0	0	0	0	0	0	0	0	0.2
TA253	north	rc	rce	1617	30	10	2014	spring	below		1965	F	A	Y	0	0	0.1	0	0.5	0	0	0	0	0.2	0	0	0	0	0	0	0	0	0	0.2
TA254	north	rc	rce	1617	28	10	2014	spring	below	T25	4946	F	J	Y	0	0	0.1	0	0	0.3	0	0	0.1	0	0	0	0	0	0	0	0	0	0	0
TA255	north	rc	rce	1617	28	10	2013	spring	below	T2	4858	F		Y	0	0	0	0	0	0	0	0	0	0	0	0	0	0	0	0	0	0	0	0
TA256	north	rc	rce	1617	28	10	2014	spring	below	T22	4995	F	J	Y	0	0	0	0	0	0	0	0	0.2	0.1	0	0	0	0	0	0	0	0	0	0
TA257	north	rc	rce	1617	28	10	2014	spring	below	T12	4768	F	A	Y	0	0	0	0	0	0	0.1	0	0.1	0	0	0	0	0	0	0	0	0	0	0
TA258	north	rc	rce	1617	28	10	2014	spring	below	T5	4928	F	A	Y	0	0	0	0	0.6	0	0	0	0	0	0	0.3	0	0	0	0	0.1	0	0	0
TA259	north	rc	rcem	1617	29	10	2014	spring	below	4				Y	0	0	0	0	0	0.1	0	0	0.2	0	0	0	0	0	0	0	0	0	0	0
TA26	north	bh		1514.5	23	10	2012	spring	above	SITE 15 TRAP 13	4573	F	A	Y	0	0	0	0	0.8	0	0	0	0	0	0	0	0	0	0	0	0	0	0	0
TA260	north	rc	rcw	1617	29	10	2014	spring	below	11		F		Y	0.1	0	0	0	0.1	0.1	0.2	0	0.1	0	0	0	0	0.2	0	0	0	0	0	0
TA261	north	rc	rcm	1617	29	10	2014	spring	below	7		F		Y	0	0	0	0	0	0	0	0	0	0	0	0	0	0	0	0	0	0	0	0
TA262	north	rc	rce	1617	28	10	2014	spring	below	3	4933	M		Y	0	0	0	0	0.4	0.6	0	0	0	0	0	0	0	0	0	0	0	0	0	0
TA263	north	rc	rcm	1617	30	10	2014	spring	below	1	4952	M		Y	0	0	0	0	0.1	0	0	0	0	0	0	0	0	0	0	0	0.4	0	0	0
TA264	north	rc	rce	1617	30	10	2014	spring	below	30	5556	F	J	Y	0	0	0	0	0	0	0	0	0	0	0	0	0	0	0	0	0	0	0	0
TA265	north	rc	rce	1617	30	10	2014	spring	below	T4	5539	M	J	Y	0	0	0.1	0	0	0	0.2	0	0.1	0	0	0	0	0	0	0	0	0	0	0
TA266	north	rc	rce	1617	30	10	2014	spring	below	T24	5579	M	A	Y	0	0	0	0	0	0.4	0	0	0	0.1	0	0	0	0	0	0	0	0	0	0
TA267	north	rc	rce	1617	30	10	2014	spring	below	T16	5550	F	J	Y	0	0	0	0.2	0	0.3	0	0	0	0	0	0	0	0	0	0	0	0	0	0
TA268	north	rc	rce	1617	31	10	2014	spring	below	T21	5557	M		Y	0	0	0	0	0	0	0	0	0	0	0	0	0	0	0	0	0	0	0	0
TA269	north	rc	rce	1617	31	10	2014	spring	below	T15		M		Y	0	0	0	0	0	0	0	0	0	0	0	0	0	0	0	0	0	0	0	0
TA27	north	bh		1514.5	23	10	2012	spring	above	SITE 15 B4	4528	F	J	Y	0	0	0	0	0.8	0	0.2	0	0	0	0	0	0	0	0	0	0	0	0	0
TA270	north	rc	rcem	1617	31	10	2014	spring	below	T5		M		Y	0	0	0	0	0	0	0.1	0	0.1	0	0	0	0	0	0	0	0	0	0	0
TA271	north	rc	rce	1617	28	10	2014	spring	below	T16	4947	F	A	Y	0	0	0	0	0	0	0.4	0	0.2	0	0	0	0	0	0	0	0	0	0	0
TA272	north	rc	rce	1617	30	10	2014	spring	below	T22	2109	F	A	Y	0	0	0	0	0	0	0	0	0	0	0	0	0	0	0	0	0	0	0	0
TA273	north	rc	rcem	1617	31	10	2014	spring	below	T17	4712	F		Y	0	0	0.1	0	0	0.1	0.2	0	0	0.1	0	0	0	0	0	0	0.3	0	0	0
TA274	north	rc	rcem	1617	30	10	2014	spring	below	T7	4889	F		Y	0	0	0	0	0.5	0	0.4	0	0	0	0	0	0	0	0	0	0	0.1	0	0
TA275	north	rc	rce	1617	31	10	2014	spring	below	T1	5577	F		Y	0	0	0.3	0.3	0	0	0	0	0	0	0	0	0	0	0	0	0.1	0	0	0
TA276	north	rc	rcem	1617	31	10	2014	spring	below	T25	5561	F		Y	0.1	0	0	0	0	0.2	0.3	0	0.2	0	0	0	0	0	0	0	0	0	0	0
TA277	north	rc	rce	1617	31	10	2014	spring	below	T22	5547	F		Y	0	0	0	0	0	0	0	0	0	0	0	0	0	0	0	0	0	0	0	0
TA278	north	rc	rce	1617	31	10	2014	spring	below	T3	5575	F		Y	0.4	0	0	0	0	0	0	0	0.2	0	0	0	0	0	0	0	0	0	0	0.2
TA279	north	rc	rce	1617	31	10	2014	spring	below	T9	5551	F		Y	0	0	0	0	0	1	0	0	0	0	0	0	0	0	0	0	0	0	0	0
TA28	north	bh		1514.5	22	10	2012	spring	above	SITE 22 ?4	4539	F	J	Y	0	0	0	0	0	0.2	0	0	0.1	0	0.1	0	0	0	0	0	0	0	0	0
TA280	north	rc	rce	1617	31	10	2014	spring	below	T31	5529	F		Y	0	0	0	0	0	0	0.2	0	0.1	0	0	0	0	0	0	0	0	0	0	0
TA281	north	rc	rce	1617	31	10	2014	spring	below	T24	5511	F		Y	0	0	0	0.4	0	0.1	0	0	0	0	0	0	0	0	0	0	0	0	0	0
TA282	north	rc	rce	1617	30	10	2014	spring	below		5546	F	A	Y	0	0	0.1	0	0	0	0	0	0.3	0	0	0.5	0	0	0	0	0.1	0	0	0
TA283	north	rc	rcm	1617	30	10	2014	spring	below	T10	4957	F		Y	0	0	0	0	0	0.2	0.2	0	0.5	0	0	0	0	0	0	0	0	0	0	0
TA284	north	rc	rcem	1617	31	10	2014	spring	below	T24	4975	F		Y	0	0	0	0	0	0.3	0	0	0.1	0	0	0	0	0	0	0	0	0	0	0
TA285	north	rc	rce	1617	31	10	2014	spring	below	T11	5523			Y	0	0	0	0.7	0	0.2	0	0	0	0	0	0	0	0	0	0	0	0	0	0
TA286	north	snow	srh	1488.5	27	3	2012	autmn	above	M11	5140	F	A	Y	0	0	0	0	0	0	0	0	0	0	0	0.3	0	0	0	0	0	0	0	0
TA287	north	snow	srh	1488.5	27	3	2012	autmn	above	M13		F	A	Y	0.1	0	0	0	0	0	0.5	0	0.1	0	0	0.3	0	0	0	0	0	0	0	0
TA288	north	snow	srh	1488.5	27	3	2012	autmn	above	M8		F	A	Y	0	0	0	0	0.1	0	0	0	0	0	0	1	0	0	0	0	0	0	0	0
TA289	north	rc	rce	1617	27	10	2011	spring	above		4849	F	A	N	0	0	0	0	0	0	0	0	0.3	0	0.1	0	0	0	0	0	0	0	0	0
TA29	north	bh		1514.5	23	10	2012	spring	above	SITE 15 TRAP 13	4573	F	A	Y	0	0	0	0	0	0	0.1	0	0	0	0	0	0	0	0	0	0	0	0	0
TA290	north	rc	rce	1617	27	10	2011	spring	above		4843	F	A	N	0.2	0	0	0	0	0	0.3	0	0.3	0	0	0.2	0	0	0	0	0	0	0	0
TA291	north	rc	rcc	1617	27	10	2011	spring	above	C23	4804	F		N	0.1	0	0	0.1	0.1	0.2	0	0	0	0.2	0	0	0	0	0	0	0	0	0	0
TA292	north	rc	rcc	1617	27	10	2011	spring	above	C7	4794	F		N	0	0	0	0.5	0	0.2	0	0	0.1	0	0	0	0	0	0	0	0	0	0	0
TA293	north	rc	rce	1617	27	10	2011	spring	above		4435			N	0	0	0.5	0	0.1	0	0	0	0.1	0	0.1	0	0	0	0	0	0	0	0	0
TA294	north	snow	srh	1488.5	25	10	2011	spring	above	B36	4235	F		Y	0	0	0	0.2	0	0.4	0	0	0	0	0.1	0	0	0.2	0	0	0	0	0	0
TA295	north	snow	srh	1488.5	26	10	2011	spring	above	B42	4805	M		Y	0	0.3	0	0	0	0.4	0.2	0	0	0	0	0	0	0	0	0	0	0	0	0
TA296	north	snow	srh	1488.5	26	10	2011	spring	above	A8	4850	F	A	Y	0	0.2	0.3	0	0	0.2	0.2	0	0	0	0	0	0	0	0	0	0	0	0	0
TA297	north	snow	srh	1488.5	25	10	2011	spring	above	A24	4635	M	A	Y	0	0.1	0.1	0	0	0.6	0.1	0	0	0	0	0	0	0	0	0	0	0	0	0
TA298	north	snow	srh	1488.5	26	10	2011	spring	above	A17	4828	F	J	Y	0	0	0	0	0	0.1	0.1	0	0	0	0	0	0	0.3	0.6	0.3	0	0	0	0
TA299	north	snow	srh	1488.5	26	10	2011	spring	above	A5	4754	M	J	Y	0	0	1	0	0	0	0	0	0	0	0	0	0	0	0	0	0	0	0	0
TA3	north	snow	srh	1488.5	20	10	2013	spring	above	A8	2112	M	A	Y	0	0.1	0	0	0	0.1	0.2	0	0.1	0	0	0	0	0	0	0	0	0	0	0
TA30	north	snow	srh	1488.5	27	3	2012	autumn	above	M8		F	A	Y	0	0	0	0	0	0	0	0	0	0	0	1	0	0	0	0	0	0	0	0
TA300	north	snow	srh	1488.5	25	10	2011	spring	above	A33	4526	M	J	Y	0	0	0.2	0	0	0	0.3	0	0	0	0	0	0	0	0	0	0.1	0	0	0
TA301	north	snow	srh	1488.5	26	10	2011	spring	above	A33	4860	M	J	Y	0	0	0	0	0	0.2	0	0	0	0	0	0	0	0	0	0	0	0	0	0
TA302	north	snow	srh	1488.5	26	10	2011	spring	above	B43	4745	M		Y	0.1	0	0	0	0.1	0.1	0.1	0	0.4	0	0.1	0	0	0	0	0	0	0	0	0
TA303	north	snow	srh	1488.5	25	10	2011	spring	above	B42	4275	M		Y	0	0	0.4	0	0	0	0.4	0	0	0	0	0	0	0.1	0	0	0	0	0	0
TA304	north	snow	srh	1488.5	25	10	2011	spring	above	A29	4772	F	A	Y	0	0	0.1	0	0.7	0	0.1	0	0	0	0	0.1	0	0	0	0	0	0	0	0
TA305	north	snow	srh	1488.5	25	10	2011	spring	above	B44	367	F		Y	0.2	0	0	0	0	0	0.2	0	0	0	0.2	0	0	0.1	0	0.1	0	0	0	0
TA306	north	snow	srh	1488.5	25	10	2011	spring	above	B29	5006	F		Y	0	0	0	0	0	0.1	0	0	0	0	0	0	0	0.2	0.4	0.2	0	0	0	0
TA307	north	snow	srh	1488.5	26	10	2011	spring	above	A1	4841	F	A	Y	0	0	0.4	0	0	0	0.3	0	0	0	0	0	0.2	0	0	0	0	0	0	0
TA308	north	snow	srh	1488.5	27	10	2011	spring	above	A30	4807	F	J	Y	0	0	0.2	0	0.2	0	0.5	0	0	0	0	0	0	0	0	0	0	0.1	0	0
TA309	north	snow	srh	1488.5	25	10	2011	spring	above	B15	4350	F		Y	0	0	0	0	0	0.2	0.1	0	0.2	0	0	0	0	0	0	0	0	0	0	0
TA31	north	snow	srh	1488.5	27	3	2012	autumn	above	M4		F	A	Y	0	0	0	0	0	0	0	0	0	0	0	1	0	0	0	0	0	0	0	0
TA310	north	snow	srh	1488.5	26	10	2011	spring	above	B42	4805	M		Y	0	0	0	0	0	0.3	0	0	0	0	0	0	0.1	0	0	0	0	0	0	0
TA311	north	snow	srh	1488.5	26	10	2011	spring	above	B4	4795	F		Y	0	0	0	0	0.4	0.2	0	0	0	0	0	0	0	0.2	0	0	0	0	0	0
TA312	north	snow	srh	1488.5	25	10	2011	spring	above	B37	4628	F		Y	0.1	0	0.1	0	0	0.1	0	0	0	0	0.6	0	0	0.1	0	0	0	0	0	0
TA313	north	snow	srh	1488.5	25	10	2011	spring	above	B41	398			Y	0	0	0.2	0	0	0	0	0	0	0	0.2	0	0.1	0	0	0	0	0	0	0
TA314	north	snow	srh	1488.5	25	10	2011	spring	above	C14	4762	F	J	Y	0	0	0	0	1	0	0	0	0	0	0	0	0	0	0	0	0	0	0	0
TA315	north	snow	srh	1488.5	27	10	2011	spring	above	B3	4788	F			0	0.1	0.1	0	0.2	0	0	0	0.2	0	0	0	0	0.1	0	0	0	0	0	0
TA316	north	snow	srh	1488.5	25	10	2011	spring	above	A32	4634	M	A	Y	0	0	0	0	0	0	0	0	0	0	0	0	0	0	0	0	0	0	0	0
TA317	north	snow	srh	1488.5	25	10	2011	spring	above	A27	4757	F	J	Y	0.2	0	0	0	0	0	0	0	0.2	0	0	0	0	0.3	0.3	0.3	0	0	0	0
TA318	north	snow	srh	1488.5	25	10	2011	spring	above	A4	4773	F	A	Y	0	0	0	0	0	0	0	0	0	0	0	0	0	0	0	0	0	0	0	0
TA319	north	snow	srh	1488.5	25	10	2011	spring	above	B4	338	F		Y	0	0	0.3	0	0.4	0.2	0	0	0	0	0	0	0	0.1	0	0	0	0	0	0
TA32	north	snow	srr below	1488.5	18	4	2012	autumn	above	16		M	J	OIL	0	0	0	0	0	0	0	0	0	0	0	0	0	0	0	0	0	0	0	0
TA320	north	snow	srh	1488.5	27	10	2011	spring	above		4829	F	A	Y	0	0	0.3	0	0	0	0	0	0.1	0	0	0	0	0	0	0	0	0	0	0
TA321	north	hjs	sd4	1225	28	10	2011	spring	above	23	4822	F		Y	0	0	0	0	0	0	0	0	0	0	0	0	0	0	0	0	0	0	0	0
TA322	north	hjs	sd4	1225	26	10	2011	spring	above	16	4229	F	A	Y	0	0	0	0	0.1	0	0	0	0	0	0	0	0	0	0	0	0	0	0	0
TA323	north	hjs		1225	26	10	2011	spring	above		4337	M	A	Y	0	0	0	0	0	0.4	0	0	0	0	0	0	0	0.2	0	0	0	0	0	0
TA324	north	hjs	sd1	1225	25	10	2011	spring	above	54	4798	M	A	Y	0.1	0	0.4	0	0.1	0	0	0	0.3	0	0	0	0	0	0	0	0	0	0	0
TA325	north	hjs	sd4	1225	25	10	2011	spring	above	6	4797	F	J	Y	0	0	0	0	0	0	0	0	0	0	0	0	0	0	0	0	0	0	0	0
TA326	north	snow	srh	1488.5	24	10	2011	spring	above	A4	343	F	A	Y	0	0	0.2	0	0	0	0	0	0	0	0	0	0	0.5	0.2	0.3	0	0.1	0	0
TA327	north	snow	srh	1488.5	24	10	2011	spring	above	A23	4420	F	A	N	0	0	0.2	0	0.3	0.1	0.2	0	0	0	0	0.1	0	0.1	0	0	0	0	0	0
TA328	north	snow	srh	1488.5	24	10	2011	spring	above	A11	358	F	A	N	0	0.2	0.1	0.3	0	0.1	0.1	0	0	0	0	0	0	0	0	0	0	0	0	0
TA329	north	snow	srh	1488.5	24	10	2011	spring	above	A26	385	F	A	N	0.2	0	0	0	0	0	0.2	0	0.1	0	0	0	0	0.3	0.2	0.2	0	0	0	0
TA33	north	snow	srr below	1488.5	17	4	2012	autumn	above	5		M	J	OIL	0	0	0	0	0	0	0.2	0	0	0	0	0	0	0	0	0	0	0	0	0
TA330	north	snow	srh	1488.5	24	10	2011	spring	above	A18	340	F	A	N	0.1	0	0.6	0.2	0	0	0	0	0	0	0	0.1	0	0	0	0	0	0	0	0
TA331	north	snow	srh	1488.5	24	10	2011	spring	above	A7	5140	F	A	N	0	0.2	0	0	0	0.4	0	0	0	0	0	0	0	0.1	0.1	0.1	0	0	0	0
TA332	north	snow	srh	1488.5	24	10	2011	spring	above	A34	350	F	A	N	0	0	0	0	0	0	0.2	0	0	0	0	0	0	0	0	0	0	0	0	0
TA333	north	snow	srh	1488.5	24	10	2011	spring	above	A2	384	F	A	N	0	0.1	0.2	0	0	0.1	0	0	0.1	0	0	0	0	0	0	0	0	0	0	0
TA334	north	snow	srh	1488.5	24	10	2011	spring	above	A22	362	F	A	N	0	0	0.3	0	0	0.7	0	0	0	0	0	0	0	0	0	0	0	0	0	0
TA335	north	snow	srh	1488.5	24	10	2011	spring	above	B1	4776			N	0	0	0.2	0	0.5	0	0	0	0	0	0	0	0	0.1	0.1	0.1	0	0	0	0
TA336	north	snow	srh	1488.5	24	10	2011	spring	above		332	M	A	N	0	0	0.5	0	0	0	0	0	0.1	0	0	0	0	0	0	0	0	0	0	0
TA337	north	snow	srr	1488.5	24	10	2011	spring	above	A20	4473	F		Y	0	0	0	0	0	0.1	0.1	0	0.1	0	0	0	0	0	0	0	0	0	0	0
TA338	north	snow	srr	1488.5	24	10	2011	spring	above	A21	4634	M		Y	0	0	0	0	0	0	0.2	0	0.1	0	0	0	0	0	0	0	0	0	0	0
TA339	north	snow	srr	1488.5	25	10	2011	spring	above	A6	4729	M	A	Y	0	0	0	0	0	0.1	0	0	0	0	0	0	0	0	0	0	0	0	0	0
TA34	north	snow	srr below	1488.5	17	4	2012	autumn	above	6		F	A	OIL	0	0	0	0	0	0	0	0	0	0	0	0	0	0	0	0	0	0	0	0
TA340	north	snow	srr	1488.5	26	10	2011	spring	above	C14		F	A	Y	0	0	0.2	0	0	0	0	0	0.1	0	0.2	0	0	0	0	0	0	0	0	0
TA341	north	snow	srr	1488.5	24	10	2011	spring	above	B3	4246	F	A	Y	0	0	0	0	0	1	0	0	0	0	0	0	0	0	0	0	0	0	0	0
TA342	north	snow	srr	1488.5	24	10	2011	spring	above	A19	4755	F		Y	0	0	0.3	0	0.4	0	0	0	0	0	0	0	0	0.1	0	0	0.1	0	0	0
TA343	north	snow	srr	1488.5	26	10	2011	spring	above	A15		F	A	Y	0.1	0	0.2	0	0	0	0.4	0	0.1	0	0.2	0	0	0	0	0	0	0	0	0
TA344	north	snow	srr	1488.5	24	10	2011	spring	above	A18	4761	F		Y	0	0.1	0.1	0	0	0	0.3	0	0.2	0	0	0	0	0	0	0	0	0	0	0
TA345	north	snow	srr	1488.5	25	10	2011	spring	above	A15	4783	F	A	Y	0	0	0.2	0.1	0	0.2	0	0	0.1	0	0.1	0	0	0.2	0	0	0	0	0	0
TA346	north	snow	srr	1488.5	26	10	2011	spring	above	B1		F	J	Y	0	0	0	0	0.2	0.3	0.2	0	0	0	0	0	0.1	0.1	0	0	0	0	0	0
TA347	north	snow	srr	1488.5	26	10	2011	spring	above	C6		F	A	Y	0	0	0	0	0	0.3	0.1	0	0	0	0	0	0	0.1	0	0	0.1	0	0	0
TA348	north	snow	srr	1488.5	24	10	2011	spring	above	A18	4758	F		Y	0	0	0.2	0	0	0	0	0	0	0	0	0	0	0.3	0	0	0	0	0	0
TA349	north	snow	srr	1488.5	24	10	2011	spring	above	A6	4633			Y	0	0	0.1	0	0	0.2	0.2	0	0	0	0	0	0	0	0	0	0.1	0	0	0.2
TA35	north	snow	srr below	1488.5	18	4	2012	autumn	above	7		M	J	OIL	0	0	0	0	0	0	0	0	0	0	0	0	0	0.6	0.3	0.6	0	0	0	0
TA350	north	snow	srr	1488.5	25	10	2011	spring	above	C10	4789	F	J	Y	0	0	0	0	0.1	0	0.1	0	0.1	0	0	0	0	0	0	0	0	0	0	0
TA351	north	snow	srr	1488.5	25	10	2011	spring	above	B1	4780	F	A	Y	0	0	0	0	0	0	0.2	0	0	0	0	0	0	0.1	0	0.1	0	0	0	0
TA352	north	snow	srr	1488.5	18	4	2012	autmn	above	7		M		N	0	0	0	0	0	0	0	0	0	0	0	0	0	0.4	0.6	0.4	0	0	0	0
TA353	north	snow	srr	1488.5	18	4	2012	autmn	above			M	A	N	0.1	0.1	0	0	0	0	0	0	0	0	0	0	0	0.1	0	0	0	0	0	0.1
TA354	north	snow	srr	1488.5	17	4	2012	autmn	above	5		M	J	N	0	0.3	0	0	0	0	0.1	0	0	0	0.2	0.2	0	0.1	0	0	0	0	0	0
TA355	north	snow	srr	1488.5	17	4	2012	autmn	above	2		M	J	N	0	0	0	0	0	0	0	0	0	0	0	0	0	0.4	0.5	0.3	0	0	0	0
TA356	north	snow	srr	1488.5	18	4	2012	autmn	above			F	A	N	0	0	0	0	0	0	0.4	0	0.1	0	0	0	0.3	0.2	0	0	0	0	0	0
TA357	north	snow	srr	1488.5	18	4	2012	autmn	above		4747	F	A	N	0	0	0	0	0	0	0	0	0	0	0	0	0	0	0	0	0	0	0	0
TA358	north	snow	srh	1488.5	17	4	2012	autmn	above	6		F	A	N	0	0	0	0	0	0	0	0	0	0	0	0	0	0	0	0	0	0	0	0
TA359	north	snow	srh	1488.5	19	4	2012	autmn	above		472	F	J	N	0	0	0	0	0	0	0.1	0	0	0	0	0.9	0	0	0	0	0	0	0	0
TA36	north	rc		1617	13	12	2010	summer	above		4548	F		Y	0.1	0	0	0.1	0	0.1	0	0	0.3	0	0	0	0	0.2	0	0	0	0	0	0
TA360	north	snow	srh	1488.5	19	4	2012	autmn	above	A8		F	A	N	0.1	0	0	0	0	0	0.2	0	0	0	0	0.5	0	0.1	0	0	0	0	0	0
TA361	north	snow	srh	1488.5	21	10	2013	spring	above	B29	4255	F		Y	0	0	0.1	0	0.8	0	0	0	0	0	0.1	0	0	0	0	0	0	0	0	0
TA362	north	snow	srh	1488.5	21	10	2013	spring	above	C15	5531	M	J	Y	0	0	0	0	0	0.2	0	0	0.1	0	0.1	0	0	0.3	0	0.3	0	0	0	0
TA363	north	snow	srh	1488.5	20	10	2013	spring	above	B29	335	F		Y	0	0	0	0	0	0	0	0	0	0	0	0	0	0	0	0	0	0	0	0
TA364	north	snow	srh	1488.5	21	10	2013	spring	above	B33	4814	M		Y	0	0	0	0	0	0.3	0	0	0.1	0	0	0	0	0	0	0	0	0	0	0
TA365	north	snow	srh	1488.5	21	10	2013	spring	above	B25	4965	M		Y	0	0	0	0	1	0	0	0	0	0	0	0	0	0	0	0	0	0	0	0
TA366	north	snow	srh	1488.5	21	10	2013	spring	above	B45	4509	M		Y	0	0	0.3	0	0.3	0.1	0	0	0	0	0	0	0	0.1	0.2	0.1	0	0	0	0
TA367	north	snow	srh	1488.5	21	10	2013	spring	above	C12	5563	F	J	Y	0.2	0.2	0.1	0	0	0.1	0.2	0	0	0	0.1	0	0	0	0	0	0	0	0	0
TA368	north	snow	srh	1488.5	21	10	2013	spring	above	C3	5514	M	J	Y	0	0	0	0	0	0	0	0	0	0	0	0	0	0	0	0	0	0	0	0
TA369	north	snow	srh	1488.5	20	10	2013	spring	above	B3	4951	F		Y	0.1	0	0	0	0.3	0.1	0	0	0	0	0	0	0	0	0	0	0	0	0	0
TA37	north	rc		1617	10	12	2010	summer	above	1		F	A	OIL	0.5	0	0.2	0	0	0	0	0	0.1	0	0	0.1	0	0	0	0	0	0	0	0
TA370	north	snow	srh	1488.5	20	10	2013	spring	above	B2	4876	F		Y	0	0.3	0	0	0.1	0	0.3	0	0	0	0.1	0	0	0	0	0	0	0	0	0
TA371	north	snow	srh	1488.5	21	10	2013	spring	above	B15	4581	F		Y	0	0	0.1	0	0	0.3	0	0	0	0	0	0.3	0	0.1	0	0.1	0.2	0	0	0
TA372	north	snow	srh	1488.5	20	10	2013	spring	above	B19	4820	F		Y	0	0.1	0	0.4	0.2	0.1	0	0	0.1	0	0	0	0	0	0	0	0	0	0	0
TA373	north	snow	srh	1488.5	21	10	2013	spring	above	A9	5527	M	J	Y	0.3	0	0.1	0	0	0	0	0	0.3	0	0	0	0	0	0	0	0	0	0	0
TA374	north	snow	srh	1488.5	21	10	2013	spring	above	B46	4819	F		Y	0.1	0	0	0	0	0	0.1	0	0	0	0	0	0	0	0	0	0	0	0	0
TA375	north	snow	srh	1488.5	20	10	2013	spring	above	A15	1957	M	A	Y	0	0	0.1	0	0	0.1	0	0	0.1	0	0	0.4	0	0	0	0	0	0	0	0
TA376	north	snow	srh	1488.5	20	10	2013	spring	above	B33	4795	F		Y	0.1	0	0	0	0	0	0	0	0.2	0	0	0	0	0.1	0	0	0.1	0	0	0
TA377	north	snow	srh	1488.5	21	10	2013	spring	above	A15	1908	F	J	Y	0	0	0.2	0	0.2	0.2	0.3	0	0.1	0	0	0	0	0	0	0	0	0	0	0
TA378	north	snow	srh	1488.5	20	10	2013	spring	above	B48	4879	F		Y	0	0	0	0	0	0.6	0.2	0	0	0	0	0	0	0	0	0	0	0	0	0
TA379	north	snow	srh	1488.5	21	10	2013	spring	above	C18	1711	M	J	Y	0	0	0.5	0	0	0.2	0	0	0.1	0	0	0	0	0	0	0	0	0	0	0
TA38	north	rc		1617	12	12	2010	summer	above		4538	F		Y	0.1	0	0.3	0	0.3	0	0	0	0	0.3	0	0	0	0	0	0	0	0	0	0
TA380	north	snow	srh	1488.5	20	10	2013	spring	above	A10	5509	F	A	Y	0	0	0	0	0	0	0	0	0	0	0	0	0	0	0	0	0	0	0	0
TA381	north	snow	srh	1488.5	20	10	2013	spring	above	B12	4587	M		Y	0	0	0	0	0	0.2	0	0	0	0	0	0	0	0.2	0	0	0.1	0.2	0	0
TA382	north	snow	srh	1488.5	21	10	2013	spring	above	B19	4600	F		Y	0	0	0	0	0.3	0.2	0.1	0	0.1	0	0	0	0	0	0	0	0	0	0	0
TA383	north	snow	srh	1488.5	21	10	2013	spring	above	A2	5519	F	J	Y	0	0.1	0	0	0.1	0.1	0	0	0	0	0	0	0	0.2	0	0	0	0	0	0
TA384	north	snow	srh	1488.5	20	10	2013	spring	above	B43	4893	F		Y	0	0	0	0.3	0	0.3	0.1	0	0.1	0	0	0	0	0	0	0	0	0	0	0
TA385	north	hjs	sd4	1225	11	4	2013	autumn	above	HJ19		F	J	Y	0	0	0	0	0	0	0.4	0	0	0	0	0	0	0.1	0	0.1	0	0	0	0
TA386	north	hjs	large screen	1225	11	4	2013	autumn	above	HJ35		F	J	Y	0	0	0	0	0.3	0	0.1	0	0	0	0	0	0	0	0.1	0	0	0	0	0
TA387	north	hjs	large screen	1225	13	4	2013	autumn	above	HJ35	DB288	F	J	Y	0	0	0	0	0	0	0	0	0	0	0	0	0	0	0	0	0	0	0	0
TA388	north	hjs	large screen	1225	17	4	2013	autumn	above	HJ35		F	J	Y	0	0	0	0	0	0	0.3	0	0	0	0	0	0	0	0	0	0	0	0	0
TA389	north	hjs	large screen	1225	13	4	2013	autumn	above	HJ35		F	J	Y	0	0	0	0	0	0	0	0	0	0	0	0	0	0.4	0.6	0.4	0	0	0	0
TA39	north	rc		1617	12	12	2010	summer	above		4438	F	A	Y	0	0	0	0	0	0	0	0	0	0	0	0	0	0.1	0	0	0	0	0	0
TA390	north	hjs		1225	24	11	2012	spring	above	HJ5	D2656			Y	0	0	0	0	0	0	0.2	0	0	0	0	0	0	0.1	0	0.1	0	0	0	0
TA391	north	hjs		1225	23	11	2012	spring	above	HJ35	4506	M		Y	0	0	0	0	0	0	0	0	0	0	0	0	0	0	0	0	0	0	0	0
TA392	north	hjs		1225	21	11	2012	spring	above	HJ35	4501	F		Y	0.1	0	0	0	0	0.8	0	0	0.1	0	0	0	0	0	0	0	0	0	0	0
TA393	north	hjs		1225	21	11	2012	spring	above	HJ35		M		Y	0	0	0	0	0	0.2	0	0	0.2	0	0	0.1	0	0.1	0	0	0	0	0	0
TA394	north	snow	sr	1488.5	25	1	2011	summer	above	B3	4525	M		N	0	0	0	0	0	1	0	0	0	0	0	0	0	0	0	0	0	0	0	0
TA395	north	snow	sr	1488.5	25	1	2011	summer	above	A40	4408	M	J	N	0	0	0	0	0	0.1	0	0	0	0	0	0	0	0	0	0	0	0	0	0
TA396	north	snow	sr	1488.5	25	1	2011	summer	above	B6	4530	M		Y	0	0	0	0	0	0.2	0	0	0	0	0	0	0	0	0	0	0	0	0	0
TA397	north	snow	sr	1488.5	25	1	2011	summer	above	A15	4561	F	J	Y	0	0	0	0.5	0	0.2	0	0	0	0	0	0	0	0	0	0	0	0	0	0
TA398	north	snow	sr	1488.5	27	1	2011	summer	above	B4	4537	F		Y	0.4	0	0	0	0	0.4	0	0	0	0	0	0	0	0	0	0	0	0	0	0
TA399	north	snow	sr	1488.5	26	1	2011	summer	above	B11	4569	F		Y	0	0	0	0	0	0.3	0	0	0.1	0	0	0	0	0	0	0	0	0	0	0
TA4	north	snow	srh	1488.5	20	10	2013	spring	above	C18	1662	M	A	Y	0.1	0.1	0.2	0	0	0.1	0	0	0.2	0	0	0	0	0	0	0	0	0	0	0
TA40	north	rc		1617	11	12	2010	summer	above	1	4443	F	A	Y	0	0	0.3	0.2	0	0	0	0	0.2	0	0	0	0	0	0	0	0	0	0	0
TA400	north	snow	sr	1488.5	28	1	2011	summer	above	A18	4640	M	A	Y	0.1	0	0.2	0	0.4	0	0	0	0	0	0	0	0	0.2	0	0	0	0	0	0
TA401	north	snow	sr	1488.5	26	1	2011	summer	above	A40	4556	M	J	Y	0	0	0	0	0	0.1	0	0	0	0	0	0	0	0	0	0	0	0	0	0
TA402	north	snow	sr	1488.5	28	1	2011	summer	above	B12	4421	F		Y	0	0.2	0.2	0	0	0.6	0	0	0	0	0	0	0	0	0	0	0	0	0	0
TA403	north	snow	sr	1488.5	26	1	2011	summer	above	B27	4559	F		Y	0.4	0	0	0	0	0	0	0	0.1	0	0	0	0	0	0.2	0	0	0	0	0.1
TA404	north	snow	sr	1488.5	26	1	2011	summer	above	B12	4563	M		Y	0	0	0	0	0.4	0.5	0.1	0	0	0	0	0	0	0	0	0	0	0	0	0
TA405	north	snow	sr	1488.5	27	1	2011	summer	above	B13	4675	M		Y	0	0	0	0.2	0	0	0	0	0.1	0	0	0	0	0	0	0	0	0	0	0
TA406	north	snow	sr	1488.5	27	1	2011	summer	above	A18	4628	F	A	Y	0	0	0	0	0	0.3	0	0	0	0	0	0	0	0	0	0	0	0	0	0
TA407	north	snow	sr	1488.5	28	1	2011	summer	above	B3	4668	F		Y	0	0	0	0	0	0.5	0	0	0	0	0.2	0	0	0.1	0	0	0	0	0	0
TA408	north	snow	sr	1488.5	27	1	2011	summer	above	B23	4543	F		Y	0	0	0	0	0.4	0	0	0	0	0	0	0	0	0.2	0	0	0	0	0	0
TA409	north	snow	sr	1488.5	27	1	2011	summer	above	A40	4544	M	J	Y	0	0	0	0	0	0.3	0	0	0.1	0	0	0	0	0.2	0	0	0	0	0	0.1
TA41	north	snow		1488.5	26	1	2011	summer	above	B13	4554	M		Y	0	0	0.4	0	0	0	0	0	0.3	0	0	0	0	0	0	0	0	0	0	0
TA410	north	snow	sr	1488.5	26	1	2011	summer	above	B10	4419	F		Y	0	0	0	0	0.2	0.3	0.1	0	0	0	0	0	0	0.1	0	0	0	0	0	0.1
TA411	north	bh		1867	23	10	2012	spring	above	A68	4988	F		Y	0	0	0	0	0	0	0	0	0	0	0	0	0	0	0	0	0	0	0	0
TA412	north	bh		1867	23	10	2012	spring	above	A74	4701	F		Y	0	0	0	0	0	1	0	0	0	0	0	0	0	0	0	0	0	0	0	0
TA413	north	bh		1867	24	10	2012	spring	above	A74	4507	M			0	0	0	0	0	0	0	0	0	0	0	0	0	0.5	0.6	0.5	0	0	0	0
TA414	north	bh		1867	24	10	2012	spring	above	C5	5508	F		Y	0	0	0	0	0	0	0	0	0	0	0	0	0	0	0	0	0	0	0	0
TA415	north	bh		1867	24	10	2012	spring	above	A22	4696	F			0	0	0	0	0	0	0.1	0	0	0	0	0	0	0.1	0.6	0.1	0	0	0	0
TA416	north	bh		1867	25	10	2012	spring	above	A34	4609	F			0	0	0	0	0	1	0	0	0	0	0	0	0	0	0	0	0	0	0	0
TA417	north	bh		1867	23	10	2012	spring	above	A23	4696	F		Y	0	0	0.2	0	0	0	0	0	0	0	0	0	0	0.2	0.6	0.2	0	0	0	0
TA418	north	bh		1867	23	10	2012	spring	above	A70	4573	F		Y	0.1	0.4	0	0	0.4	0	0	0	0	0	0	0	0	0	0	0	0.1	0	0	0
TA419	north	bh		1867	24	10	2012	spring	above	A50	5552	M			0	0	0	0	0	0	0	0	0	0	0	0	0	0	0	0	0	0	0	0
TA42	north	snow		1488.5	26	1	2011	summer	above	B24	4564	F		Y	0.1	0	0	0	0.2	0.1	0.1	0	0	0	0	0	0	0	0	0	0	0	0	0
TA420	north	bh		1867	23	10	2012	spring	above	7		F	J	Y	0	0	0	0	0	0.6	0	0	0	0	0	0	0	0	0	0	0	0	0	0
TA421	north	hjs	hj41	1225	23	11	2013	spring	above	T10	D2037	M	J	Y	0	0	0	0	0	0	0	0	0	0	0	0	0	0	0	0	0	0	0	0
TA422	north	hjs	hj26	1225	21	11	2013	spring	above		D8CAB	F	J	Y	0.3	0	0	0	0	0.7	0	0	0	0	0	0	0	0	0	0	0	0	0	0
TA423	north	hjs	hj35	1225	21	11	2013	spring	above	T5	DA816	F	A	Y	0	0	0	0	0	0	0	0	0	0	0	0	0	0	0	0	0	0	0	0
TA424	north	hjs	hj35	1225	21	11	2013	spring	above	T19	DC313	F	A	Y	0.1	0	0	0	0.1	0.5	0	0	0	0	0	0	0	0	0	0	0	0	0	0
TA43	north	snow		1488.5	28	1	2011	summer	above	B3	4668	F		Y	0.2	0	0	0	0	0.3	0	0	0.1	0	0	0	0	0	0	0	0	0	0	0
TA44	north	snow		1488.5	26	1	2011	summer	above	B5	4544	M		Y	0	0	0	0	0	0.2	0	0	0	0	0	0	0	0	0	0	0	0	0	0
TA45	north	snow		1488.5	26	1	2011	summer	above	A34	4414	M	J	Y	0.1	0	0.1	0	0	0.2	0	0	0	0.1	0	0	0	0	0	0	0	0	0	0
TA46	north	snow		1488.5	26	1	2011	summer	above	B34	4420	F		Y	0	0	0	0	0	0	0	0	0.1	0	0	0.1	0	0.2	0	0	0	0	0	0
TA47	north	snow		1488.5	27	1	2011	summer	above	A18	4628	F	A	Y	0	0	0.3	0	0	0	0	0	0.4	0	0	0	0	0	0.1	0	0	0	0	0
TA48	north	snow		1488.5	26	1	2011	summer	above	B3	4535	F		Y	0	0	0	0	0	0	0.5	0	0.2	0	0	0	0	0	0	0	0	0	0	0
TA49	north	snow		1488.5	28	1	2011	summer	above	B8	4410	M		Y	0	0	0.6	0	0	0	0	0	0.1	0	0	0	0	0	0	0	0	0	0	0
TA5	north	snow	srh	1488.5	20	10	2013	spring	above	C13	5565	F		Y	0	0.2	0.2	0	0	0	0.1	0	0.1	0	0.1	0	0	0.1	0	0	0	0	0	0
TA50	north	snow		1488.5	26	1	2011	summer	above	A39	4557	F	A	Y	0	0	0	0	0	0.3	0	0	0.2	0	0	0	0	0	0	0	0	0	0	0
TA51	north	snow	srh	1488.5	19	4	2012	autumn	above	B4	4350	F	A	OIL	0	0	0	0	0	0	0	0	0	0	0	1	0	0	0	0	0	0	0	0
TA52	north	snow		1488.5	13	4	2010	autumn	above	A13	4545	M		Y	0	0	0	0	0.5	0	0	0	0	0	0	0	0	0.2	0	0	0	0	0	0
TA53	north	snow		1488.5	13	12	2010	summer	above	A2	4527	F	A		0.1	0	0.4	0	0	0	0	0	0.2	0	0	0	0	0.1	0	0	0	0	0	0
TA54	north	snow		1488.5	13	12	2010	summer	above	B LINE 5	4428				0	0	0.2	0.4	0	0.3	0	0	0	0	0.1	0	0	0	0	0	0	0	0	0
TA55	north	snow		1488.5	13	12	2010	summer	above	C1 BLINE 2?	4379	M	A	Y	0	0	0	0	0	0	0	0	0	0	0	0	0	0	0	0	0	0	0	0
TA56	north	snow		1488.5	11	12	2010	summer	above	A12	4436	F	A	Y	0	0.1	0	0	0	0	0	0	0.1	0	0	0	0	0	0	0	0	0	0	0
TA57	north	snow		1488.5	13	12	2010	summer	above	B5	4526	M	J		0.3	0	0	0	0	0	0.1	0	0.3	0	0	0	0	0	0	0	0	0	0	0
TA58	north	snow		1488.5	13	12	2010	summer	above	A7	4531	M	J		0	0	0	0	0	0.1	0	0	0.3	0	0	0	0	0	0	0	0	0	0	0
TA59	north	snow		1488.5	11	12	2010	summer	above	A13	4450	M		Y	0	0	0	0.2	0	0	0	0	0	0	0	0	0	0	0	0	0	0.2	0	0
TA6	north	snow	srh	1488.5	20	10	2013	spring	above	C12	4650	F	A	Y	0.1	0	0.2	0	0	0	0	0	0.1	0	0	0	0	0.3	0	0	0	0	0	0
TA60	north	snow		1488.5	12	12	2010	summer	above	A13	4434	M		Y	0	0	0.1	0	0.8	0	0.1	0	0	0	0	0	0	0	0	0	0	0	0	0
TA61	north	snow		1488.5	12	12	2010	summer	above	A LINE 7	4430	M	J	Y	0	0	0	0	0	0	0	0	0	0	0	0	0	0	0	0	0	0	0	0
TA62	north	snow		1488.5	11	12	2010	summer	above	B LINE 7	4437	M	J	Y	0	0	0	0	0	0.2	0	0	0.2	0	0	0	0	0	0	0	0.1	0	0	0
TA63	north	hjs		1225	19	10	2012	spring	above	HJ35	4502	F			0	0	0	0	0.5	0.5	0	0	0	0	0	0	0	0	0	0	0	0	0	0
TA64	north	hjs		1225	19	10	2012	spring	above	HJ35	4505	M			0	0	0	0	0	0.2	0.2	0	0.2	0	0	0	0	0	0	0	0	0	0	0
TA65	north	hjs		1225	18	10	2012	spring	above	HJ SD 4	4229	F	A		0	0	0.2	0	0	0	0	0	0.6	0	0	0	0	0	0	0	0	0	0	0
TA66	north	hjs		1225	17	10	2012	spring	above	HJ41		M			0.9	0	0	0	0	0	0	0	0	0	0	0.2	0	0	0	0	0	0	0	0
TA67	north	hjs		1225	19	10	2012	spring	above	HJ35	4960	M			0	0	0.5	0	0.2	0	0	0	0	0	0	0	0	0.1	0.2	0.1	0	0	0	0
TA68	north	hjs		1225	18	10	2012	spring	above	HJ SD 4	4963	F	A		0	0	0	0	0.5	0	0	0	0	0	0	0	0	0.1	0.4	0.1	0	0	0	0
TA69	north	hjs		1225	18	10	2012	spring	above	HJ SD 4	4955	F	A		0.2	0	0	0	0	0	0	0	0.5	0	0	0	0	0	0	0	0	0	0	0
TA7	north	snow	srh	1488.5	20	10	2013	spring	above	A17	5533	M	A	Y	0	0	0.1	0	0	0	0	0	0	0	0.1	0.5	0	0	0	0	0	0	0	0
TA70	north	hjs		1225	21	10	2012	spring	above	HJ26	4577	M			0	0	0	0	0.1	0	0.2	0	0	0	0	0	0	0	0	0	0	0	0	0
TA71	north	hjs		1225	28	1	2011	summer	above	HJ26		M	J	Y	0	0	0	0	0	0	0	0	0.2	0	0	0	0	0.5	0	0	0	0	0	0
TA72	north	hjs		1225	27	1	2011	summer	above	HJ26		F	J	Y	0	0	0	0	0	0	0	0	0.2	0	0	0	0	0.8	0	0	0	0	0	0
TA73	north	hjs		1225	27	1	2011	summer	above	HJ26		M		Y	0	0	0	0	0	0	0	0	0	0	0	0	0	0	0	0	0	0	0	0
TA74	north	hjs		1225	28	1	2011	summer	above	HJ28		M	J	Y	0	0	0	0	0	0	0	0	0	0	0	0	0	0.6	0	0	0	0	0	0
TA75	north	hjs		1225	25	1	2011	summer	above	HJ27		F	A	Y	0	0	0	0	0	0	0	0	0	0	0	0	0	1	0	0	0	0	0	0
TA76	north	hjs		1225	16	3	2013	autumn	above	HJ31	T14	F	J		0	0	0	0	0	0	0	0	0	0	0	0	0	0.3	0.6	0.3	0	0	0	0
TA77	north	hjs		1225	15	3	2013	autumn	above	HJ35	T17	F	J		0	0	0	0	0	0	0.1	0	0	0	0.1	0	0	0.2	0.5	0.2	0	0	0	0
TA78	north	hjs		1225	16	3	2013	autumn	above	HJ41	1507	M	A		0.1	0	0.4	0	0	0	0.1	0	0.2	0	0	0	0	0	0	0	0	0	0	0
TA79	north	hjs		1225	15	3	2013	autumn	above	HJ35	T12	F	J		0	0	0	0	0	0	0	0	0	0	0	0	0	0	0.3	0	0	0	0	0
TA8	north	snow	srh	1488.5	20	10	2013	spring	above	C22	5526	F	A	Y	0.1	0.2	0.2	0.2	0	0.1	0	0	0.1	0	0.1	0	0	0	0	0	0	0	0	0
TA80	north	hjs		1225	16	3	2013	autumn	above	HJ41	T19	M	J		0	0	0.1	0	0	0	0	0	0	0	0	0	0	0.3	0	0	0	0	0	0
TA81	north	hjs		1225	16	3	2013	autumn	above	HJ41	T19	F	J		0.2	0	0.5	0	0	0	0	0	0.1	0	0.2	0	0	0	0	0	0	0	0	0
TA82	north	hjs		1225	15	3	2013	autumn	above	HJ35	T22	F	J		0	0	0	0	0	0	0	0	0	0	0	0	0	0	0	0	0	0	0	0
TA83	north	hjs		1225	23	11	2013	spring	above	HJ41	T14	F	J		0	0	0	0	1	0	0	0	0	0	0	0	0	0	0	0	0	0	0	0
TA84	north	hjs		1225	22	11	2013	spring	above	HJ41	T8	M	A		0	0	0	0	0.8	0	0.2	0	0	0	0	0	0	0	0	0	0	0	0	0
TA85	north	hjs		1225	21	11	2013	spring	above	HJ35	T22	M	A		0.2	0	0	0.3	0	0.3	0	0	0.2	0	0	0	0	0	0	0	0	0	0	0
TA86	north	hjs		1225	21	11	2013	spring	above	HJ19	4822	M	A		0	0	0	0	0	0	0	0	0	0	0	0	0	0	0	0	0	0	0	0
TA87	north	hjs		1225	21	11	2013	spring	above	HJ19	T34	M	A		0	0	0	0	0	0	0	0	0	0	0	0	0	0	0	0	0	0	0	0
TA88	north	hjs		1225	21	11	2013	spring	above	HJ35	T13	F	J		0	0	0	0	0	0	0	0	0.4	0	0	0	0	0	0	0	0	0	0	0
TA89	north	hjs		1225	23	11	2013	spring	above	HJ19	T16	F	A		0	0	0	0	0	0	0	0	0	0	0	0	0	0	0	0	0	0	0	0
TA9	north	snow	srh	1488.5	20	10	2013	spring	above	B40	4886	M		Y	0	0	0	0	0	0	0	0	0.1	0	0.2	0.4	0	0	0	0	0	0	0	0
TA90	north	hjs		1225	24	11	2013	spring	above	HJ05	T8	M	A		0	0	0	0	0	0	0	0	0.3	0	0	0	0	0	0	0	0	0	0	0
TA91	north	hjs		1225	21	11	2013	spring	above	HJ35	4506	M	A		0.5	0	0	0	0	0.2	0	0	0.1	0	0	0	0	0	0	0	0	0	0	0
TA92	north	hjs		1225	24	11	2013	spring	above	HJ35	T18	M	A		0	0	0	0	1	0	0	0	0	0	0	0	0	0	0	0	0	0	0	0
TA93	north	hjs		1225	22	11	2013	spring	above	HJ41	T20	F	A		0	0	0	0.4	0	0	0	0	0.1	0	0	0	0	0	0	0	0	0	0	0
TA94	north	hjs	l screen	1225	17	4	2013	autumn	above	HJ35			J	Y	0	0	0.1	0	0	0	0	0	0.1	0	0.1	0	0	0	0	0	0	0	0	0
TA95	north	hjs	l screen	1225	13	4	2013	autumn	above	HJ35		F	J	Y	0	0	0	0	0	0	0	0	0	0	0	0	0	0	0	0	0	0	0	0
TA96	north	hjs	spoil	1225	15	4	2013	autumn	above	HJ19	T59	F	J	Y	0	0	0	0	0	0	0	0	0.2	0	0	0	0	0	0	0	0	0	0	0
TA97	north	hjs	spoil	1225	14	4	2013	autumn	above	HJ19		F	A	Y	0.1	0	0.3	0	0.4	0	0.1	0	0	0	0	0	0	0.1	0	0	0	0	0	0
TA98	north	hjs	l screen	1225	13	4	2013	autumn	above	HJ35	T24	F	J	Y	0	0	0	0	0	0	0	0	0	0	0	0	0	0	0	0	0	0	0	0
TA99	north	hjs	l screen	1225	13	4	2013	autumn	above	HJ35		F	J	Y	0	0	0	0	0	0	0.1	0	0	0	0	0	0	0	0	0	0	0	0	0
TA104	south	par		1798	24	11	2014	spring	below	C15	4065			Y	0.4	0	0.3	0	0	0	0	0	0	0	0	0	0	0.1	0.3	0.1	0	0	0	0
TA105	south	par		1798	23	11	2014	spring	below	C3	D3A77			Y	0	0	0	0.8	0	0.1	0	0	0	0	0	0	0	0	0	0	0	0	0	0
TA106	south	par		1798	24	11	2014	spring	below	E21	D2A61			Y	0	0	0	0	0	0	0	0	0	0	0	0	0	0	0	0	0	0	0	0
TA107	south	par		1798	22	11	2014	spring	below	C4	D4846	M	A		1	0	0	0	0	0	0	0	0	0	0	0	0	0	0	0	0	0	0	0
TA108	south	par		1798	22	11	2014	spring	below	C21		F	A		0	0	0	0	1	0	0	0	0	0	0	0	0	0	0	0	0	0	0	0
TA109	south	par		1798	22	11	2014	spring	below	A7		F	A		0	0	0.2	0	0.3	0.6	0	0	0	0	0	0	0	0	0.3	0	0	0	0	0
TA110	south	par		1798	21	11	2014	spring	below	B23	D464B	F	A		0.4	0	0	0	0	0	0	0	0	0	0	0	0	0	0.2	0	0.4	0	0	0
TA111	south	par		1798	21	11	2014	spring	below	B2	D3005	M			0.1	0.2	0.1	0	0	0.1	0	0	0.4	0	0	0	0	0	0	0	0	0	0	0
TA112	south	par		1798	21	11	2014	spring	below	A25	DB4FE	F	A		0.9	0	0	0	0	0.5	0	0	0	0	0	0	0	0	0	0	0	0	0	0
TA113	south	par		1798	21	11	2014	spring	below	C23	D6A09	F	J		0	0.1	0	0	0	0	0	0	0.8	0	0	0	0	0	0	0	0	0	0	0
TA114	south	par		1798	21	11	2014	spring	below	A15	D5A10	F	A		0	0	0	0	0	0.7	0	0	0	0	0	0	0	0	0	0	0	0	0	0
TA115	south	par		1798	21	11	2014	spring	below	B24	D2AOA	F	A		0.2	0	0	0	0.2	0.3	0	0	0.1	0	0	0	0	0	0	0	0.4	0	0	0
TA116	south	sr		1918	15	11	2014	spring	below	A25	DB757	M	A		0.3	0	0	0	0	0	0	0	0	0	0	0	0	0	0	0	0	0	0	0
TA117	south	sr		1918	15	11	2014	spring	below	A20	D84EE	F	SA		0	0	0.1	0	0.8	0	0	0	0.2	0	0	0	0	0	0	0	0	0	0	0
TA118	south	sr		1918	15	11	2014	spring	below	C2	DA6AO	M			0.1	0	0	0	0.7	0.1	0	0	0.1	0	0	0	0	0	0	0	0	0	0	0
TA119	south	sr		1918	15	11	2014	spring	below	D9	D1D8B	F			0.3	0	0	0	0	0.7	0	0	0	0	0	0	0	0	0	0	0	0	0	0
TA120	south	sr		1918	15	11	2014	spring	below	D16	DA9A7	M			0.1	0	0	0	0	0	0	0.2	0	0.2	0	0.3	0	0	0	0	0	0	0	0
TA121	south	sr		1918	15	11	2014	spring	below	A28		M	A		0	0	0	0	0	0	0	0	0	0	0	0	0	0	0	0	0	0	0	0
TA122	south	sr		1918	15	11	2014	spring	below	B14	D93B7	F	J		0	0	0	0.4	0	0.2	0	0	0	0	0	0	0	0	0	0	0	0	0	0
TA123	south	sr		1918	15	11	2014	spring	below	D18	D2B77				0	0	0	0	0	0	0	0	0.2	0	0	0	0	0.3	0	0	0	0	0	0
TA124	south	sr		1918	15	11	2014	spring	below	C7	DD31E	F			0	0	0	0	0	0	0	0	0	0	0	0	0	0	0	0	0	0	0	0
TA125	south	sr		1918	15	11	2014	spring	below	C24	D8C85	F			0.6	0	0.1	0	0.2	0	0	0	0.1	0	0	0	0	0	0	0	0	0	0	0
TA126	south	sr		1918	15	11	2014	spring	below	A11		F	A		0	0	0	0.4	0	0.7	0	0	0	0	0	0.1	0	0	0	0	0	0	0	0
TA127	south	sr		1918	15	11	2014	spring	below	A2	D3F35	F	J		0.6	0	0	0	0	0	0	0	0	0	0	0	0	0	0	0	0	0	0	0
TA128	south	sr		1918	15	11	2014	spring	below	27		M	J		0	0	0	0.8	0	0.2	0	0	0	0	0	0	0	0	0	0	0	0	0	0
TA129	south	sr		1918	15	11	2014	spring	below	13C	D228C	F			0	0	0	0	0	0	0	0	0	0	0	0	0	0	0	0	0	0	0	0
TA130	south	bc	ubc	1867	18	11	2014	spring	below	E5	DB4CF	F			0	0	0	0	0.3	0.4	0	0.5	0	0	0	0	0	0	0	0	0	0	0	0
TA131	south	bc	ubc	1867	18	11	2014	spring	below	5	DEF2B	F			0.5	0	0	0	0	0	0	0	0.4	0	0	0	0.1	0	0	0	0	0	0	0
TA132	south	bc	ubc	1867	19	11	2014	spring	below	11	DA985	M			0.2	0	0.2	0	0	0.1	0	0	0	0	0	0.1	0	0	0	0	0	0	0	0
TA133	south	bc	bcp	1867	19	11	2014	spring	below	12	DD357	F	J		0.2	0	0.2	0	0	0	0	0	0	0	0	0.4	0	0	0	0	0.1	0	0	0
TA134	south	bc	ubc	1867	18	11	2014	spring	below	24	DB524	F			0	0	0.1	0	0.5	0.1	0	0.2	0	0	0	0	0	0	0	0	0	0	0	0
TA135	south	bc	bcp	1867	18	11	2014	spring	below	11	DAC57	F	J		0	0	0	0	0.1	0.7	0	0	0	0	0	0	0	0	0	0	0.1	0	0	0
TA136	south	bc	bcp	1867	17	11	2014	spring	below	17	D6181	F	J		0	0.1	0	0.1	0.1	0.1	0	0.2	0	0	0	0	0	0	0	0	0.1	0.4	0	0
TA137	south	bc	bcp	1867	19	11	2014	spring	below	32	DAE20	F			0	0	0.3	0	0	0	0	0.2	0	0	0	0.3	0	0	0	0	0	0	0	0
TA138	south	bc	lbc	1867	17	11	2014	spring	below	14		F			0	0	0	0	0	0	0	0.2	0.1	0	0	0.1	0	0.1	0	0	0.1	0.1	0	0
TA139	south	bc	bcp	1867	18	11	2014	spring	below	5	D6AC9	F	J		0.2	0	0.1	0.2	0	0.3	0	0	0.1	0	0	0	0	0	0	0	0	0	0	0
TA140	south	bc	bcp	1867	18	11	2014	spring	below	17	DA406	M	J		0	0.1	0.1	0.2	0	0	0	0.1	0	0	0	0.3	0	0	0	0	0	0	0	0
TA141	south	bc	bcp	1867	1	11	2014	spring	below	5	UROBC8E	F	A		0	0	0.1	0.3	0	0.2	0	0	0	0	0	0	0	0.4	0	0	0	0	0	0
TA142	south	bc	bcp	1867	17	11	2014	spring	below	26	D9960	F	A		0.1	0	0	0	0.2	0	0	0	0.1	0	0	0.9	0	0	0	0	0	0	0	0
TA143	south	bc	bcp	1867	19	11	2014	spring	below	28	D946F	F	A		0	0	0.5	0	0.3	0	0	0	0	0	0	0	0	0	0	0	0	0	0	0
TA144	south	bc	bcp	1867	18	11	2014	spring	below	29	DD049	F	J		0	0	0.2	0	0	0	0	0	0.1	0	0	0.3	0	0.1	0	0	0	0	0	0
TA145	south	bc	lbc	1867	17	11	2014	spring	below	15	D33C3	F			0.1	0	0.2	0	0	0	0	0	0	0	0	0	0	0.7	0	0	0	0.2	0	0
TA146	south	bc	bcp	1867	19	11	2014	spring	below	14	DCD06	F	J		0.1	0	0	0	0	0	0	0	0	0	0	0	0	0	0	0	0	0	0	0
TA147	south	cp		1776	19	11	2014	spring	below	B15	DD499				0	0	0	0	0.5	0.9	0	0	0	0	0	0	0	0	0	0	0	0	0	0
TA148	south	cp		1776	19	11	2014	spring	below	B4	D3579	F			0	0	0	0	0.3	0	0	0	0.1	0	0	0	0.2	0	0	0	0	0	0	0
TA149	south	cp		1776	19	11	2014	spring	below	D24	DAD9B	F			0	0.1	0.1	0	0	0	0	0.1	0	0	0	0	0	0.4	0	0	0	0	0	0
TA150	south	cp		1776	19	11	2014	spring	below	C9	DDB47	M	J		0	0	0.6	0	0.4	0	0	0	0	0	0	0	0	0	0	0	0	0	0	0
TA151	south	cp		1776	19	11	2014	spring	below	D8	D2654	M	A		0	0	0	0	0	0.3	0	0.2	0	0	0	0	0	0.1	0	0	0	0	0	0
TA152	south	cp		1776	19	11	2014	spring	below	A23	D5EF1	F			0	0	0	0	0.3	0.4	0	0.1	0.1	0	0	0	0	0	0	0	0	0	0	0
TA153	south	cp		1776	19	11	2014	spring	below	A24	BC34	F			0	0	0	0	0.6	0	0	0	0	0	0	0	0	0	0	0	0	0.4	0	0
TA154	south	cp		1776	19	11	2014	spring	below	D3	DB2DB	M	J		0	0	0	0	0	0	0	0	0	0	0	0	0	0	0	0	0	0	0	0
TA155	south	cp		1776	19	11	2014	spring	below	D7	D1C12	M	A		0	0	0.2	0	0	0.2	0	0	0	0	0	0	0	0	0	0	0	0	0	0
TA156	south	cp		1776	19	11	2014	spring	below	4	D60A2	F	A		0	0	0.2	0	0.1	0	0	0	0	0	0	0	0	0.6	0	0	0.1	0	0	0
TA157	south	cp		1776	19	11	2014	spring	below	D25	DB93A	M	J		0	0	0.3	0	0	0.7	0	0	0	0	0	0	0	0	0	0	0	0	0	0
TA158	south	cp		1776	19	11	2014	spring	below	B22	24B7	F			0	0	0	0	0	0.2	0	0	0.1	0	0	0	0	0.1	0	0	0.1	0	0	0
TA159	south	cp		1776	19	11	2014	spring	below	B2	D8838	M			0	0	0	0	0	0	0	0	0	0	0	0	0	0	0	0	0	0	0	0
TA160	south	cp		1776	19	11	2014	spring	below	D18	DA685	M	J		0	0	0.2	0	0.4	0	0	0	0	0	0	0.4	0	0	0	0	0	0	0	0
TA161	south	cp		1776	19	11	2014	spring	below	C4	D8747	F	J		0	0	0	0	0.4	0	0	0	0.1	0	0	0	0	0.1	0	0	0	0	0	0
TA162	south	cp		1776	19	11	2014	spring	below	D6	D50D6	F	A		0	0	0.4	0	0	0	0	0	0.2	0	0	0.1	0	0	0	0	0	0	0	0
TA163	south	cp		1776	19	11	2014	spring	below	B24	3C76	M			0	0	0	0	0	0.8	0	0	0	0	0	0	0	0	0	0	0.1	0	0	0
TA164	south	koz	kps	2092.5	25	11	2012	spring	above	7	D1F00	F		Y	0	0	0	0	0	0	0	0	0	0	0	0	0	0	0	0	0	0	0	0
TA165	south	koz	sh	2092.5	25	11	2012	spring	above	29	D3940	F	J	Y	0.2	0	0	0	0	0	0	0	0	0	0	0	0	0	0	0	0	0	0	0
TA166	south	koz	kpn	2092.5	24	11	2012	spring	above	3	DA650	M			0	0	0	0	0	0.3	0	0	0.4	0	0	0	0	0	0	0	0	0	0	0
TA167	south	koz	kpn	2092.5	24	11	2012	spring	above	6	D9987	M			0	0	0	0	0	0.2	0	0	0.1	0	0	0	0	0	0	0	0	0	0	0
TA168	south	koz	kpn	2092.5	23	11	2012	spring	above	17	D2030	F		Y	0	0	0.5	0	0	0.3	0	0	0	0	0	0	0	0.1	0	0	0	0	0	0
TA169	south	koz	ks	2092.5	23	11	2012	spring	above	2	D3C4C	M		Y	0	0	0	0	0	0	0	0	0.1	0	0	0	0	0	0	0	0	0	0	0
TA170	south	koz	kpn	2092.5	23	11	2012	spring	above	4	D89A4	F		Y	0	0	0.3	0	0	1	0	0	0	0	0	0	0	0	0	0	0	0	0	0
TA171	south	koz	kpn	2092.5	23	11	2012	spring	above	13	D7D08	F		Y	0	0	0.3	0	0	0.1	0	0	0	0	0	0	0	0	0	0	0	0	0	0
TA172	south	koz	kpn	2092.5	23	11	2012	spring	above	9	D2ED4	M		Y	0	0	0.3	0	0	0.5	0	0	0	0	0	0	0	0	0	0	0	0	0	0
TA173	south	koz	kpn	2092.5	23	11	2012	spring	above	7	D4913	F		Y	0	0	0.6	0	0	0.3	0	0	0	0	0	0	0	0	0	0	0	0	0	0
TA174	south	koz	kpn	2092.5	24	11	2012	spring	above	2	D2D24	F		Y	0	0	0	0	0	0	0	0	0	0	0	0	0	0	0	0	0	0	0	0
TA175	south	koz	kpn	2092.5	23	11	2012	spring	above	12	DC692	F		Y	0	0	0.1	0	0	0.7	0	0	0	0	0	0	0	0	0	0	0	0	0	0
TA176	south	koz	ks	2092.5	22	11	2012	spring	above	6	D6506	M			0	0	0	0	0	0	0	0	0	0	0	0	0	0	0	0	0	0	0	0
TA177	south	koz	kpn	2092.5	23	11	2012	spring	above	20	D3D4E	M		Y	0	0.2	0.2	0	0	0.1	0	0	0.5	0	0	0	0	0	0	0	0	0	0	0
TA178	south	koz	kpn	2092.5	23	11	2012	spring	above	11	DCE8F	M		Y	0	0	0.3	0	0	0	0	0	0	0	0	0	0	0	0	0	0	0	0	0
TA179	south	koz	kpn	2092.5	24	11	2012	spring	above	20	D5CA3	M		Y	0.1	0	0	0	0	0	0	0	0.1	0.1	0	0	0	0	0	0	0	0	0	0
TA180	south	koz	ks	2092.5	23	11	2012	spring	above	42	D273A		J	Y	0	0	0.4	0	0	0	0	0	0.1	0	0	0	0	0.2	0	0	0	0	0	0
TA181	south	koz	ks	2092.5	22	11	2012	spring	above	36	E4002	F	A	Y	0	0	0	0	0.5	0	0	0	0	0	0	0	0.2	0	0	0	0	0	0	0
TA182	south	koz	kpn	2092.5	22	11	2012	spring	above	9	D38B7	M	A		0	0	0.3	0	0	0	0	0	0.4	0	0	0	0	0	0	0	0	0	0	0
TA183	south	koz	ks	2092.5	23	11	2012	spring	above	40	DC16C	M	J	Y	0	0	0	0	0	0	0	0	0	0	0	0	0	0.1	0	0	0	0	0	0
TA184	south	koz	ks	2092.5	23	11	2012	spring	above	9	D361B	F	J	Y	0	0	0.1	0	0	0	0	0	0	0	0	0	0	0	0	0	0	0	0	0
TA185	south	koz	ks	2092.5	22	11	2012	spring	above	17	D1C07	M	J	Y	0	0	0.2	0	0	0	0	0	0.1	0	0	0	0	0.1	0	0	0	0	0	0
TA186	south	koz	ks	2092.5	22	11	2012	spring	above	25	D2334	F	J	Y	0	0	0.2	0	0	0	0	0.1	0.2	0	0	0	0	0.1	0	0	0.3	0	0	0
TA187	south	koz	ks	2092.5	22	11	2012	spring	above	6	D1BF0	F			0	0	0.4	0	0	0.4	0	0	0.2	0	0	0	0	0	0	0	0	0	0	0
TA188	south	koz	kpn	2092.5	22	11	2012	spring	above	13	DB2CD	F		Y	0.1	0	0	0	0.2	0	0	0	0.4	0	0	0	0	0.1	0	0	0	0	0	0
TA189	south	koz	ks	2092.5	22	11	2012	spring	above	39	DD8AE	M	A	Y	0	0	0	0.1	0	0.8	0	0	0.1	0	0	0	0	0	0	0	0	0	0	0
TA190	south	bc	lbc	1867	18	11	2012	spring	above	16	DB755	F			0	0	0	0	0	0	0	0	0	0	0	0	0	0	0	0	0	0	0	0
TA191	south	bc	bcp	1867	18	11	2012	spring	above	32	D4436	M			0	0	0	0	0	0.3	0	0	0	0	0	0	0	0	0	0	0	0	0	0
TA192	south	bc	bcp	1867	18	11	2012	spring	above	2	D1D86	M			0	0	0	0	0.3	0.2	0	0	0	0	0	0	0	0.1	0	0	0	0	0	0
TA193	south	bc	bcp	1867	18	11	2012	spring	above	15		F			0	0	0	0	0	0	0	0	0	0	0	0	0	0	0	0	0	0	0	0
TA194	south	bc	bcp	1867	18	11	2012	spring	above	8	DBC8E	F			0	0	0.4	0	0	0.1	0	0	0	0	0	0	0	0	0	0	0	0	0	0
TA195	south	bc	lbc	1867	21	11	2012	spring	above	A18	DCA95	M			0	0	0	0	0	0	0	0	0	0	0	0	0	0	0	0	0	0	0	0
TA196	south	bc	bcp	1867	18	11	2012	spring	above	26	D9960	F			0	0	0	0	0	0	0	0	0	0	0	0	0	0	0	0	0	0	0	0
TA197	south	bc	lbc	1867	19	11	2012	spring	above	30	D2654	F			0	0	0	0	0	0.1	0	0	0.2	0	0	0.2	0	0.1	0	0	0	0	0	0
TA198	south	bc	lbc	1867	18	11	2012	spring	above	17	D6F44	F			0	0	0	0	0	0.3	0	0	0	0	0	0	0	0.1	0	0	0.3	0	0	0
TA199	south	bc	lbc	1867	18	11	2012	spring	above	33	DAB54	F			0	0	0.1	0	0	0	0	0.2	0	0	0	0	0	0	0	0	0	0	0	0
TA200	south	bc	bcp	1867	18	11	2012	spring	above	F5	D38CA	M			0	0	0	0	0	0.1	0	0.2	0	0	0	0	0	0.1	0	0	0	0	0	0
TA201	south	bc	ab	1867	21	11	2012	spring	above	AB5	D6A25	M			0	0	0	0	0	0.2	0	0.1	0	0	0	0	0	0	0	0	0	0	0	0
TA202	south	bc	bcp	1867	19	11	2012	spring	above	2	D831D				0	0	0	0	0.2	0.1	0	0	0	0	0	0.2	0	0.2	0	0	0	0	0	0
TA425	south	cp		1776	20	11	2011	spring	above	D5	4179	F	A	Y	0	0.3	0.1	0	0.2	0.1	0	0.1	0	0	0	0	0	0.1	0	0	0	0	0	0
TA426	south	cp		1776	19	11	2011	spring	above	C16	4611	M		Y	0.5	0	0	0	0	0.3	0	0.1	0	0	0	0	0	0	0	0	0	0	0	0
TA427	south	cp		1776	21	11	2011	spring	above	B7	4622	M		Y	0	0	0	0	0	0.6	0	0	0	0	0	0	0	0	0	0	0	0	0	0
TA428	south	cp		1776	19	11	2011	spring	above	C6	4687	M		Y	0	0	0	0	0	0.3	0	0	0	0	0	0	0	0	0	0	0	0	0	0
TA429	south	cp		1776	19	11	2011	spring	above	B11		F		Y	0.9	0	0	0	0.1	0	0	0	0	0	0	0	0	0	0	0	0	0	0	0
TA430	south	cp		1776	19	11	2011	spring	above	D24	4672			Y	0.1	0	0.1	0	0	0	0	0	0.1	0.1	0	0	0.2	0.1	0	0	0	0	0	0
TA431	south	sr		1918	22	11	2011	spring	above		4881	F	A	N	0	0	0.1	0	0.1	0	0	0	0.4	0	0	0	0	0.1	0	0	0	0	0	0
TA432	south	sr		1918	22	11	2011	spring	above			F		N	0	0	0	0	0.3	0.1	0	0	0.2	0	0	0	0.3	0	0	0	0.1	0	0	0
TA433	south	sr		1918	22	11	2011	spring	above	C5	4977			N	0	0	0	0	0	0	0	0	0.4	0	0	0	0	0	0	0	0	0	0	0
TA434	south	sr		1918	22	11	2011	spring	above	A50	4898	M		N	0	0	0	0	0.1	0.3	0	0.2	0	0	0	0	0.1	0	0	0	0	0	0	0.2
TA435	south	sr		1918	22	11	2011	spring	above	B5	4625	F		N	0	0	0	0	0.6	0.1	0	0	0.1	0	0	0	0.2	0	0	0	0	0	0	0
TA436	south	sr		1918	22	11	2011	spring	above	A22	4405	M		N	0	0	0	0	0.1	0.7	0	0	0.1	0	0	0	0	0	0	0	0	0	0	0
TA437	south	par		1798	22	11	2011	spring	above	C12	4656	F		N	0.1	0	0	0	0.1	0.3	0	0	0	0	0	0	0	0.2	0	0	0.3	0	0	0
TA438	south	par		1798	22	11	2011	spring	above	C10	4715	M		N	0	0	0.1	0	0	0.4	0	0.2	0.2	0	0	0	0	0	0.1	0	0	0	0	0
TA439	south	par		1798	22	11	2011	spring	above	B6	4722	F		N	0	0	0.2	0	0	0	0	0.3	0	0	0	0.3	0	0	0	0	0	0	0	0.2
TA440	south	par		1798	22	11	2011	spring	above		4713	F		N	0.5	0	0	0	0	0.1	0	0	0	0	0	0	0.2	0.1	0	0	0	0	0	0
TA441	south	par		1798	22	11	2011	spring	above	C23	4719	F		N	0	0.5	0	0	0	0	0	0	0.2	0	0	0	0	0	0	0	0.2	0	0	0
TA442	south	par		1798	22	11	2011	spring	above	6	4236	F		N	0	0	0.4	0	0	0	0	0.3	0	0	0	0	0.1	0	0	0	0	0	0	0
TA443	south	bc	bcp	1867	20	11	2011	spring	above	12		M		Y	0	0	0	0	0	0.6	0	0.1	0	0	0.1	0	0	0	0	0	0	0	0	0
TA444	south	bc	lbc	1867	20	11	2011	spring	above	33	4676	F		Y	0	0.1	0.1	0	0.1	0.3	0	0	0	0	0	0	0	0	0	0	0	0	0	0.1
TA445	south	bc		1867	21	11	2011	spring	above	A6	4854	M		Y	0.6	0.1	0	0	0	0	0	0	0	0	0	0	0	0.1	0	0	0	0	0	0
TA446	south	bc	lbc	1867	20	11	2011	spring	above	28	4683	F		Y	0.1	0	0	0	0	0.5	0	0	0	0	0	0	0.1	0	0	0	0	0	0	0
TA447	south	bc	bcp	1867	20	11	2011	spring	above	12	4602	F		Y	0	0	0	0	0	0.5	0	0.2	0	0	0	0	0	0	0	0	0	0	0	0
TA448	south	bc	lbc	1867	20	11	2011	spring	above	4	4688	M		Y	0.1	0	0	0	0	0.9	0	0	0	0	0	0	0	0	0	0	0	0	0	0
TA449	south	par		1798	21	11	2013	spring	above	A10		F		Y	0.7	0	0	0	0.2	0	0	0	0	0	0	0	0	0.1	0	0	0	0	0	0
TA450	south	par		1798	21	11	2013	spring	above	B5		F		Y	0	0	0.2	0	0	0	0	0.1	0	0	0	0	0	0.3	0	0	0	0	0	0
TA451	south	par		1798	21	11	2013	spring	above	B6		M		Y	0.1	0	0.3	0	0	0.1	0	0	0	0	0	0	0	0.1	0	0	0	0	0	0
TA452	south	par		1798	21	11	2013	spring	above	C3	8A91			Y	0.2	0.1	0.1	0	0	0	0	0.1	0	0	0	0	0	0.4	0	0	0.1	0	0	0
TA453	south	par		1798	21	11	2013	spring	above	C4	3CD7	F		Y	0.1	0	0	0	0	0	0	0	0	0	0	0	0	0	0.1	0	0	0	0	0
TA454	south	par		1798	21	11	2013	spring	above	B2	C393	M		Y	0.2	0	0.5	0	0	0	0	0.1	0.2	0	0	0	0	0	0	0	0	0	0	0
TA455	south	par		1798	21	11	2013	spring	above	B24	D2A0A			Y	0	0	0.1	0	0	0.4	0	0	0	0	0	0	0	0	0	0	0.5	0	0	0
TA456	south	par		1798	21	11	2013	spring	above	B14	D464B			Y	0.2	0.2	0.2	0	0	0	0	0.1	0	0	0	0	0	0.1	0	0	0	0	0	0
TA457	south	cp		1776	9	2	2012	summer	above	D18	4732	M	A	N	0	0	0	0	0.4	0	0	0.2	0.1	0	0.1	0	0.2	0	0	0	0	0	0	0
TA458	south	cp		1776	9	3	2012	autumn	above	D13		F	A	N	0	0	0	0	0	0	0	0.4	0	0	0	0	0	0	0	0	0	0	0	0
TA459	south	sr		1918	16	3	2012	autumn	above	D5		F	A	Y	0	0	0.1	0	0	0	0	0.6	0	0	0	0	0	0.2	0	0	0	0	0	0
TA460	south	sr		1918	14	3	2012	autumn	above	A21		F	J	Y	0	0	0	0	1	0	0	0	0	0	0	0	0	0	0	0	0	0	0	0
TA461	south	sr		1918	14	3	2012	autumn	above	C6	DD08C	M	J	Y	0	0	0.1	0	0	0	0	0.3	0.1	0	0	0	0.1	0	0	0	0	0	0	0
TA462	south	sr		1918	15	3	2012	autumn	above	C25	DD0B7	F	J	Y	0	0	0	0	0	0	0	0	0	0	0	0	0	0	0	0	0	0	0	0
TA463	south	sr		1918	15	3	2012	autumn	above	A13	D75DE	M		Y	0.2	0	0.1	0	0	0	0	0.3	0	0	0	0	0	0	0	0	0	0	0.4	0
TA464	south	sr		1918	15	3	2012	autumn	above	A16	D91FA	M		Y	0.2	0	0	0	0	0	0	0	0.3	0	0	0	0	0	0	0	0	0	0.3	0.1
TA465	south	sr		1918	15	3	2012	autumn	above	C2	D514A	F	J	Y	0	0	0.1	0	0.1	0	0	0	0	0	0	0	0	0	0	0	0	0	0.5	0
TA466	south	sr		1918	15	3	2012	autumn	above	A21	D2A17	F		Y	0	0	0	0	0	0	0	0.4	0	0	0	0	0	0.3	0	0	0	0	0.3	0
TA467	south	sr		1918	15	3	2012	autumn	above	B21	D6E7A	F	J	Y	0	0	0	0	0	0	0	0.1	0.1	0	0	0	0	0	0	0	0	0	0.5	0
TA468	south	cp		1776	12	3	2012	autumn	above	A18	D5628	M	A	Y	0	0	0	0	0	0	0	0.1	0	0	0	0	0	0	0	0	0	0	0	0
TA469	south	cp		1776	12	3	2012	autumn	above	B23	DB7B2	F	J	Y	0	0	0	0	0	0	0	0.5	0.1	0	0	0	0.1	0	0	0	0	0	0.2	0
TA470	south	cp		1776	12	3	2012	autumn	above	B12	D87F0	F	A	Y	0	0	0	0	0	0	0	0	0	0	0	0	0	0	0	0	0	0	0	0
TA471	south	cp		1776	12	3	2012	autumn	above	D23	D579E	M		Y	0	0	0	0	0	0	0	0.3	0	0	0	0	0	0	0	0	0	0	0	0
TA472	south	cp		1776	11	3	2012	autumn	above	B14	4700	M	A	Y	0	0	0	0	0	0	0	0.7	0.3	0	0	0	0	0	0	0	0	0	0	0
TA473	south	cp		1776	12	3	2012	autumn	above	B21	4643	F	A	Y	0.2	0	0	0	0	0	0	0.1	0.3	0	0	0	0	0.1	0	0	0	0	0	0
TA474	south	cp		1776	11	3	2012	autumn	above	D6	D70C0	F	A	Y	0	0	0	0	0	0	0	0.1	0	0	0	0	0	0	0	0	0	0	0	0
TA475	south	cp		1776	11	3	2012	autumn	above	B23	DA1DA	F	A	Y	0	0	0	0	0	0	0	0	0	0	0	0	0	0	0	0	0	0	0	0
TA476	south	cp		1776	10	3	2012	autumn	above	D12	DD132	M	J	Y	0	0	0	0	0	0	0	0	0	0	0	0	0	0	0	0	0	0	0	0
TA477	south	cp		1776	10	3	2012	autumn	above	D15	D8809	M	A	Y	0	0	0	0	0	0	0	0	0	0	0	0	0	0.5	0	0	0	0	0	0
TA478	south	cp		1776	10	3	2012	autumn	above	C4	4697	F	A	Y	0.2	0	0	0	0	0	0	0.2	0	0	0	0.1	0	0	0	0	0	0	0	0
TA479	south	cp		1776	11	3	2012	autumn	above	B8	4882	F	A	Y	0	0	0	0	0.6	0	0	0	0	0	0	0	0	0	0	0	0	0	0	0
TA480	south	cp		1776	11	3	2012	autumn	above	A24	4642	F		Y	0.1	0	0	0	0	0	0	0	0	0	0	0	0	0	0	0	0	0	0	0
TA481	south	sr		1918	16	3	2011	autumn	above	A5		M	J	N	0	0	0	0	0	0.1	0	0	0	0	0	0	0.3	0	0	0	0	0	0	0
TA482	south	sr		1918	16	3	2011	autumn	above	A6		F	A	N	0	0	0	0	0	0	0	0	0	0	0	0	0	0	0	0	0	0	0	0
TA483	south	sr		1918	16	3	2011	autumn	above	A28	363	F	A	N	0	0	0	0	0	0	0	0.2	0.2	0	0	0	0	0.1	0	0	0	0	0	0.1
TA484	south	sr		1918	16	3	2011	autumn	above	C12	4231	M		N	0	0	0	0	0.2	0	0	0.1	0	0	0	0	0	0	0	0	0	0	0.7	0
TA485	south	sr		1918	16	3	2011	autumn	above	A3		F	A	N	0	0	0	0	0	0	0	0.2	0	0	0	0	0	0.1	0	0	0	0	0.1	0
TA486	south	sr		1918	16	3	2011	autumn	above	A24		M	A	N	0	0	0	0	0	0	0	0.1	0.1	0	0	0	0	0.1	0	0	0	0	0.3	0
TA487	south	sr		1918	16	3	2011	autumn	above	A15		M	J	N	0	0	0	0	0	0	0	0	0	0	0	0	0	0	0	0	0	0	0	0
TA488	south	sr		1918	16	3	2011	autumn	above	A29		M	J	N	0	0	0	0	0	0	0	0	0	0	0	0	0	0.1	0	0	0	0	0	0
TA489	south	sr		1918	16	3	2011	autumn	above	B22		M		N	0	0	0.2	0	0.4	0.1	0	0.1	0	0	0	0	0	0	0	0	0	0	0	0.1
TA490	south	sr		1918	16	3	2011	autumn	above	B6		M		N	0	0	0.3	0	0	0	0	0	0.3	0	0	0	0.1	0	0	0	0	0	0	0
TA491	south	cp		1776	17	3	2011	autumn	above	A2		M	J	Y	0	0	0	0	0	0	0	0	0	0	0	0	0	0	0	0	0	0	0	0
TA492	south	cp		1776	16	3	2011	autumn	above	D4	4480	F		Y	0	0	0	0	0	0	0	0	0	0	0	0	0	0.1	0	0	0	0	0	0
TA493	south	cp	cpc	1776	16	3	2011	autumn	above		4740			Y	0	0	0.1	0	0	0	0	0.3	0	0	0	0	0.3	0	0	0	0	0	0.1	0
TA494	south	cp		1776	17	3	2011	autumn	above	B20				Y	0	0	0	0	0	0.1	0	0.1	0	0	0	0	0	0	0	0	0	0	0	0
TA495	south	cp		1776	16	3	2011	autumn	above	D18	4732	M		Y	0	0	0	0	0	0	0	0.3	0	0	0	0	0	0.1	0	0	0	0	0.1	0
TA496	south	cp		1776	16	3	2011	autumn	above	A4	4751	M	J	Y	0	0	0.1	0	0	0	0	0	0	0	0	0	0	0.2	0	0	0	0	0	0
TA497	south	cp	cpv	1776	15	3	2011	autumn	above		4616	M	J	N	0	0	0	0	0	0	0	0.1	0	0	0	0	0.1	0	0	0	0	0	0	0
TA498	south	cp		1776	16	3	2011	autumn	above		4720	F		N	0.1	0	0	0	0	0	0	0.2	0	0	0	0	0	0	0	0	0	0	0	0
TA499	south	cp	cpv	1776	15	3	2011	autumn	above		4686	F	J	N	0	0	0	0	0	0	0	0	0	0	0	0	0	0	0	0	0	0	0	0
TA500	south	cp		1776	15	3	2011	autumn	above		333	F	A	N	0	0	0	0	0	0	0	0.2	0	0	0.1	0	0	0	0	0	0	0	0	0
TA501	south	cp		1776	15	3	2011	autumn	above		4334	F		N	0	0	0	0	0	0	0	0	0	0	0	0	0	0.1	0	0	0	0	0	0.1
TA502	south	cp		1776	15	3	2011	autumn	above			F	A	N	0.1	0	0	0	0	0	0	0	0	0	0	0	0	0	0	0	0	0	0	0
TA503	south	cp		1776	15	3	2011	autumn	above		480	F		N	0.5	0	0	0	0.2	0	0	0	0	0	0	0.3	0	0	0	0	0	0	0	0
TA504	south	cp	cpv	1776	15	3	2011	autumn	above		4693	F	J	N	0.1	0	0	0	0	0.4	0	0	0	0	0	0	0	0	0	0	0	0	0	0
TA505	south	cp		1776	15	3	2011	autumn	above		4299	F		N	0	0	0	0	0	0	0	0.5	0.1	0	0	0	0	0.2	0	0	0	0	0	0
TA506	south	cp		1776	15	3	2011	autumn	above		4717	F	J	N	0	0	0	0	0	0.2	0	0	0	0	0	0	0	0	0	0	0	0	0	0
TA507	south	cp	cpv	1776	15	3	2011	autumn	above		4290	M	A	N	0	0	0.1	0	0	0	0	0	0	0	0	0.8	0	0	0	0	0	0	0.1	0
TA508	south	cp		1776	15	3	2011	autumn	above		4249	F	J	N	0.4	0	0.1	0	0	0	0	0	0	0	0	0	0	0	0	0	0	0	0	0
TA509	south	cp	cpv	1776	15	3	2011	autumn	above		4417	F	A	N	0	0	0	0	0	0.2	0	0	0.1	0	0	0	0	0.2	0	0	0	0	0	0.1
TA510	south	cp		1776	7	2	2011	summer	above		368	F	A	Y	0	0	0	0	0	1	0	0	0	0	0	0	0	0	0	0	0	0	0	0
TA511	south	cp		1776	7	2	2011	summer	above	D4	4433	F	A	Y	0	0	0	0	0	0.7	0	0	0	0	0	0	0	0	0	0	0	0	0	0
TA512	south	cp		1776	7	2	2011	summer	above	B15	4721	F	J	Y	0	0	0	0	0	1	0	0	0	0	0	0	0	0	0	0	0	0	0	0
TA513	south	cp		1776	7	2	2011	summer	above	D18	4720	F	J	Y	0	0	0	0	0	1	0	0	0	0	0	0	0	0	0	0	0	0	0	0
TA514	south	cp		1776	7	2	2011	summer	above	D8	4459	M	A	Y	0	0	0	0	0	1	0	0	0	0	0	0	0	0	0	0	0	0	0	0
TA515	south	cp		1776	7	2	2011	summer	above	D9		F	A	Y	0	0	0	0	0	0.1	0	0	0	0	0	0	0.1	0	0	0	0	0	0	0
TA516	south	wr		1680	23	11	2013	spring	above	C3	DE241	M		Y	0	0	0	0	0.2	0.4	0	0.1	0	0	0	0	0	0	0	0	0	0	0	0
TA517	south	wr		1680	22	11	2013	spring	above	D9	DC7A5	M		Y	0	0	0	0	0	1	0	0	0	0	0	0	0	0	0	0	0	0	0	0
TA518	south	wr		1680	22	11	2013	spring	above	D3	D9657	M		Y	0	0.1	0	0	0	0.7	0	0.1	0	0	0	0	0	0	0	0	0	0	0	0
TA519	south	wr		1680	21	11	2013	spring	above	B16	DE4F8	F	A		0	0.1	0	0	0	0.8	0	0	0	0	0	0	0	0	0	0	0.1	0	0	0
TA520	south	wr		1680	21	11	2013	spring	above	D6	DC0FC	F		Y	0.8	0	0.1	0	0	0	0	0	0	0	0	0	0	0	0	0	0.1	0	0	0
TA521	south	wr		1680	23	11	2013	spring	above	D13	D4682	F		Y	0.3	0	0.1	0	0	0.6	0	0	0	0	0	0	0	0	0	0	0	0	0	0
TA522	south	cp		1776	17	11	2013	spring	above	D6	DC13A				0	0	0	0	0	0.3	0	0	0.2	0	0	0	0	0	0	0	0	0	0	0
TA523	south	cp		1776	17	11	2013	spring	above	D13	60A2	F	A		0	0	0.2	0	0.4	0	0	0	0	0	0	0	0	0.3	0	0	0	0	0	0
TA524	south	cp	cpa	1776	19	11	2013	spring	above	A21	DAEA8	F		Y	0	0	0	0	0	0.8	0	0	0	0	0	0	0	0	0	0	0	0	0	0
TA525	south	cp	cp	1776	17	11	2013	spring	above	D18	D87F	F	A		0.5	0	0.2	0	0	0.3	0	0	0	0	0	0	0	0	0	0	0	0	0	0
TA526	south	cp		1776	17	11	2013	spring	above	D21	D697	F	A		0	0	0	0	0	0	0	0	0	0	0	0	0	0	0	0	0	0	0	0
TA527	south	cp		1776	17	11	2013	spring	above	A20	72DDBC	M		Y	0	0	0	0	0	1	0	0	0	0	0	0	0	0	0	0	0	0	0	0
TA528	south	cp		1776	17	11	2013	spring	above	B23		M			0	0	0	0	0	0.1	0	0	0	0	0	0	0	0	0	0	0	0	0	0
TA529	south	cp		1776	17	11	2013	spring	above	T19		F			0	0.1	0	0	0	0	0	0	0	0	0	0	0	0	0	0	0	0	0	0
TA530	south	cp		1776	17	11	2013	spring	above	25	DC95F	M	A		0	0	0	0	0.1	0.7	0	0.1	0	0	0	0	0	0	0	0	0	0	0	0

## Sheet: rainfall_comparison
slide	location	site	population	elevation	day	month	year	season	rainfall	trap np	id	Sex	Age	walnut	coleoptera	araneae	lepidoptera larvae	lepidoptera	a.montanus fruit	local.invert	diplopoda	orthoptera	p.ligustrina	p.lawrencei	plant.other	alpine celery
TA164	south	koz	kps	2092.5	25	11	2012	spring	above	7	D1F00	F		Y	0	0	0	0	0	0	0	0	0	0	0	0
TA165	south	koz	sh	2092.5	25	11	2012	spring	above	29	D3940	F	J	Y	0.2	0	0	0	0	0	0	0	0	0	0	0
TA166	south	koz	kpn	2092.5	24	11	2012	spring	above	3	DA650	M			0	0	0	0.3	0	0.4	0	0	0	0	0	0
TA167	south	koz	kpn	2092.5	24	11	2012	spring	above	6	D9987	M			0	0	0	0.2	0	0.1	0	0	0	0	0	0
TA168	south	koz	kpn	2092.5	23	11	2012	spring	above	17	D2030	F		Y	0	0.5	0	0.3	0	0	0	0	0	0	0.1	0
TA169	south	koz	ks	2092.5	23	11	2012	spring	above	2	D3C4C	M		Y	0	0	0	0	0	0.1	0	0	0	0	0	0
TA170	south	koz	kpn	2092.5	23	11	2012	spring	above	4	D89A4	F		Y	0	0.3	0	1	0	0	0	0	0	0	0	0
TA171	south	koz	kpn	2092.5	23	11	2012	spring	above	13	D7D08	F		Y	0	0.3	0	0.1	0	0	0	0	0	0	0	0
TA172	south	koz	kpn	2092.5	23	11	2012	spring	above	9	D2ED4	M		Y	0	0.3	0	0.5	0	0	0	0	0	0	0	0
TA173	south	koz	kpn	2092.5	23	11	2012	spring	above	7	D4913	F		Y	0	0.6	0	0.3	0	0	0	0	0	0	0	0
TA174	south	koz	kpn	2092.5	24	11	2012	spring	above	2	D2D24	F		Y	0	0	0	0	0	0	0	0	0	0	0	0
TA175	south	koz	kpn	2092.5	23	11	2012	spring	above	12	DC692	F		Y	0	0.1	0	0.7	0	0	0	0	0	0	0	0
TA176	south	koz	ks	2092.5	22	11	2012	spring	above	6	D6506	M			0	0	0	0	0	0	0	0	0	0	0	0
TA177	south	koz	kpn	2092.5	23	11	2012	spring	above	20	D3D4E	M		Y	0	0.2	0	0.1	0	0.5	0	0	0	0	0	0
TA178	south	koz	kpn	2092.5	23	11	2012	spring	above	11	DCE8F	M		Y	0	0.3	0	0	0	0	0	0	0	0	0	0
TA179	south	koz	kpn	2092.5	24	11	2012	spring	above	20	D5CA3	M		Y	0.1	0	0	0	0	0.1	0.1	0	0	0	0	0
TA180	south	koz	ks	2092.5	23	11	2012	spring	above	42	D273A		J	Y	0	0.4	0	0	0	0.1	0	0	0	0	0.2	0
TA181	south	koz	ks	2092.5	22	11	2012	spring	above	36	E4002	F	A	Y	0	0	0.5	0	0	0	0	0	0	0.2	0	0
TA182	south	koz	kpn	2092.5	22	11	2012	spring	above	9	D38B7	M	A		0	0.3	0	0	0	0.4	0	0	0	0	0	0
TA183	south	koz	ks	2092.5	23	11	2012	spring	above	40	DC16C	M	J	Y	0	0	0	0	0	0	0	0	0	0	0.1	0
TA184	south	koz	ks	2092.5	23	11	2012	spring	above	9	D361B	F	J	Y	0	0.1	0	0	0	0	0	0	0	0	0	0
TA185	south	koz	ks	2092.5	22	11	2012	spring	above	17	D1C07	M	J	Y	0	0.2	0	0	0	0.1	0	0	0	0	0.1	0
TA186	south	koz	ks	2092.5	22	11	2012	spring	above	25	D2334	F	J	Y	0	0.2	0	0	0.1	0.2	0	0	0	0	0.1	0
TA187	south	koz	ks	2092.5	22	11	2012	spring	above	6	D1BF0	F			0	0.4	0	0.4	0	0.2	0	0	0	0	0	0
TA188	south	koz	kpn	2092.5	22	11	2012	spring	above	13	DB2CD	F		Y	0.1	0	0.2	0	0	0.4	0	0	0	0	0.1	0
TA189	south	koz	ks	2092.5	22	11	2012	spring	above	39	DD8AE	M	A	Y	0	0	0	0.8	0	0.1	0	0	0	0	0	0
TA190	south	bc	lbc	1867	18	11	2012	spring	above	16	DB755	F			0	0	0	0	0	0	0	0	0	0	0	0
TA191	south	bc	bcp	1867	18	11	2012	spring	above	32	D4436	M			0	0	0	0.3	0	0	0	0	0	0	0	0
TA192	south	bc	bcp	1867	18	11	2012	spring	above	2	D1D86	M			0	0	0.3	0.2	0	0	0	0	0	0	0.1	0
TA193	south	bc	bcp	1867	18	11	2012	spring	above	15		F			0	0	0	0	0	0	0	0	0	0	0	0
TA194	south	bc	bcp	1867	18	11	2012	spring	above	8	DBC8E	F			0	0.4	0	0.1	0	0	0	0	0	0	0	0
TA195	south	bc	lbc	1867	21	11	2012	spring	above	A18	DCA95	M			0	0	0	0	0	0	0	0	0	0	0	0
TA196	south	bc	bcp	1867	18	11	2012	spring	above	26	D9960	F			0	0	0	0	0	0	0	0	0	0	0	0
TA197	south	bc	lbc	1867	19	11	2012	spring	above	30	D2654	F			0	0	0	0.1	0	0.2	0	0	0.2	0	0.1	0
TA198	south	bc	lbc	1867	18	11	2012	spring	above	17	D6F44	F			0	0	0	0.3	0	0	0	0	0	0	0.1	0
TA199	south	bc	lbc	1867	18	11	2012	spring	above	33	DAB54	F			0	0.1	0	0	0.2	0	0	0	0	0	0	0
TA200	south	bc	bcp	1867	18	11	2012	spring	above	F5	D38CA	M			0	0	0	0.1	0.2	0	0	0	0	0	0.1	0
TA201	south	bc	ab	1867	21	11	2012	spring	above	AB5	D6A25	M			0	0	0	0.2	0.1	0	0	0	0	0	0	0
TA202	south	bc	bcp	1867	19	11	2012	spring	above	2	D831D				0	0	0.2	0.1	0	0	0	0	0.2	0	0.2	0
TA425	south	cp		1776	20	11	2011	spring	above	D5	4179	F	A	Y	0	0.1	0.2	0.1	0.1	0	0	0	0	0	0.1	0
TA426	south	cp		1776	19	11	2011	spring	above	C16	4611	M		Y	0.5	0	0	0.3	0.1	0	0	0	0	0	0	0
TA427	south	cp		1776	21	11	2011	spring	above	B7	4622	M		Y	0	0	0	0.6	0	0	0	0	0	0	0	0
TA428	south	cp		1776	19	11	2011	spring	above	C6	4687	M		Y	0	0	0	0.3	0	0	0	0	0	0	0	0
TA429	south	cp		1776	19	11	2011	spring	above	B11		F		Y	0.9	0	0.1	0	0	0	0	0	0	0	0	0
TA430	south	cp		1776	19	11	2011	spring	above	D24	4672			Y	0.1	0.1	0	0	0	0.1	0.1	0	0	0.2	0.1	0
TA431	south	sr		1918	22	11	2011	spring	above		4881	F	A	N	0	0.1	0.1	0	0	0.4	0	0	0	0	0.1	0
TA432	south	sr		1918	22	11	2011	spring	above			F		N	0	0	0.3	0.1	0	0.2	0	0	0	0.3	0	0
TA433	south	sr		1918	22	11	2011	spring	above	C5	4977			N	0	0	0	0	0	0.4	0	0	0	0	0	0
TA434	south	sr		1918	22	11	2011	spring	above	A50	4898	M		N	0	0	0.1	0.3	0.2	0	0	0	0	0.1	0	0
TA435	south	sr		1918	22	11	2011	spring	above	B5	4625	F		N	0	0	0.6	0.1	0	0.1	0	0	0	0.2	0	0
TA436	south	sr		1918	22	11	2011	spring	above	A22	4405	M		N	0	0	0.1	0.7	0	0.1	0	0	0	0	0	0
TA437	south	par		1798	22	11	2011	spring	above	C12	4656	F		N	0.1	0	0.1	0.3	0	0	0	0	0	0	0.2	0
TA438	south	par		1798	22	11	2011	spring	above	C10	4715	M		N	0	0.1	0	0.4	0.2	0.2	0	0	0	0	0	0
TA439	south	par		1798	22	11	2011	spring	above	B6	4722	F		N	0	0.2	0	0	0.3	0	0	0	0.3	0	0	0
TA440	south	par		1798	22	11	2011	spring	above		4713	F		N	0.5	0	0	0.1	0	0	0	0	0	0.2	0.1	0
TA441	south	par		1798	22	11	2011	spring	above	C23	4719	F		N	0	0	0	0	0	0.2	0	0	0	0	0	0
TA442	south	par		1798	22	11	2011	spring	above	6	4236	F		N	0	0.4	0	0	0.3	0	0	0	0	0.1	0	0
TA443	south	bc	bcp	1867	20	11	2011	spring	above	12		M		Y	0	0	0	0.6	0.1	0	0	0.1	0	0	0	0
TA444	south	bc	lbc	1867	20	11	2011	spring	above	33	4676	F		Y	0	0.1	0.1	0.3	0	0	0	0	0	0	0	0
TA445	south	bc		1867	21	11	2011	spring	above	A6	4854	M		Y	0.6	0	0	0	0	0	0	0	0	0	0.1	0
TA446	south	bc	lbc	1867	20	11	2011	spring	above	28	4683	F		Y	0.1	0	0	0.5	0	0	0	0	0	0.1	0	0
TA447	south	bc	bcp	1867	20	11	2011	spring	above	12	4602	F		Y	0	0	0	0.5	0.2	0	0	0	0	0	0	0
TA448	south	bc	lbc	1867	20	11	2011	spring	above	4	4688	M		Y	0.1	0	0	0.9	0	0	0	0	0	0	0	0
TA449	south	par		1798	21	11	2013	spring	above	A10		F		Y	0.7	0	0.2	0	0	0	0	0	0	0	0.1	0
TA450	south	par		1798	21	11	2013	spring	above	B5		F		Y	0	0.2	0	0	0.1	0	0	0	0	0	0.3	0
TA451	south	par		1798	21	11	2013	spring	above	B6		M		Y	0.1	0.3	0	0.1	0	0	0	0	0	0	0.1	0
TA452	south	par		1798	21	11	2013	spring	above	C3	8A91			Y	0.2	0.1	0	0	0.1	0	0	0	0	0	0.4	0
TA453	south	par		1798	21	11	2013	spring	above	C4	3CD7	F		Y	0.1	0	0	0	0	0	0	0	0	0	0	0
TA454	south	par		1798	21	11	2013	spring	above	B2	C393	M		Y	0.2	0.5	0	0	0.1	0.2	0	0	0	0	0	0
TA455	south	par		1798	21	11	2013	spring	above	B24	D2A0A			Y	0	0.1	0	0.4	0	0	0	0	0	0	0	0
TA456	south	par		1798	21	11	2013	spring	above	B14	D464B			Y	0.2	0.2	0	0	0.1	0	0	0	0	0	0.1	0
TA457	south	cp		1776	9	2	2012	summer	above	D18	4732	M	A	N	0	0	0.4	0	0.2	0.1	0	0.1	0	0.2	0	0
TA458	south	cp		1776	9	3	2012	autumn	above	D13		F	A	N	0	0	0	0	0.4	0	0	0	0	0	0	0
TA459	south	sr		1918	16	3	2012	autumn	above	D5		F	A	Y	0	0.1	0	0	0.6	0	0	0	0	0	0.2	0
TA460	south	sr		1918	14	3	2012	autumn	above	A21		F	J	Y	0	0	1	0	0	0	0	0	0	0	0	0
TA461	south	sr		1918	14	3	2012	autumn	above	C6	DD08C	M	J	Y	0	0.1	0	0	0.3	0.1	0	0	0	0.1	0	0
TA462	south	sr		1918	15	3	2012	autumn	above	C25	DD0B7	F	J	Y	0	0	0	0	0	0	0	0	0	0	0	0
TA463	south	sr		1918	15	3	2012	autumn	above	A13	D75DE	M		Y	0.2	0.1	0	0	0.3	0	0	0	0	0	0	0.4
TA464	south	sr		1918	15	3	2012	autumn	above	A16	D91FA	M		Y	0.2	0	0	0	0	0.3	0	0	0	0	0	0.3
TA465	south	sr		1918	15	3	2012	autumn	above	C2	D514A	F	J	Y	0	0.1	0.1	0	0	0	0	0	0	0	0	0.5
TA466	south	sr		1918	15	3	2012	autumn	above	A21	D2A17	F		Y	0	0	0	0	0.4	0	0	0	0	0	0.3	0.3
TA467	south	sr		1918	15	3	2012	autumn	above	B21	D6E7A	F	J	Y	0	0	0	0	0.1	0.1	0	0	0	0	0	0.5
TA468	south	cp		1776	12	3	2012	autumn	above	A18	D5628	M	A	Y	0	0	0	0	0.1	0	0	0	0	0	0	0
TA469	south	cp		1776	12	3	2012	autumn	above	B23	DB7B2	F	J	Y	0	0	0	0	0.5	0.1	0	0	0	0.1	0	0.2
TA470	south	cp		1776	12	3	2012	autumn	above	B12	D87F0	F	A	Y	0	0	0	0	0	0	0	0	0	0	0	0
TA471	south	cp		1776	12	3	2012	autumn	above	D23	D579E	M		Y	0	0	0	0	0.3	0	0	0	0	0	0	0
TA472	south	cp		1776	11	3	2012	autumn	above	B14	4700	M	A	Y	0	0	0	0	0.7	0.3	0	0	0	0	0	0
TA473	south	cp		1776	12	3	2012	autumn	above	B21	4643	F	A	Y	0.2	0	0	0	0.1	0.3	0	0	0	0	0.1	0
TA474	south	cp		1776	11	3	2012	autumn	above	D6	D70C0	F	A	Y	0	0	0	0	0.1	0	0	0	0	0	0	0
TA475	south	cp		1776	11	3	2012	autumn	above	B23	DA1DA	F	A	Y	0	0	0	0	0	0	0	0	0	0	0	0
TA476	south	cp		1776	10	3	2012	autumn	above	D12	DD132	M	J	Y	0	0	0	0	0	0	0	0	0	0	0	0
TA477	south	cp		1776	10	3	2012	autumn	above	D15	D8809	M	A	Y	0	0	0	0	0	0	0	0	0	0	0.5	0
TA478	south	cp		1776	10	3	2012	autumn	above	C4	4697	F	A	Y	0.2	0	0	0	0.2	0	0	0	0.1	0	0	0
TA479	south	cp		1776	11	3	2012	autumn	above	B8	4882	F	A	Y	0	0	0.6	0	0	0	0	0	0	0	0	0
TA480	south	cp		1776	11	3	2012	autumn	above	A24	4642	F		Y	0.1	0	0	0	0	0	0	0	0	0	0	0
TA481	south	sr		1918	16	3	2011	autumn	above	A5		M	J	N	0	0	0	0.1	0	0	0	0	0	0.3	0	0
TA482	south	sr		1918	16	3	2011	autumn	above	A6		F	A	N	0	0	0	0	0	0	0	0	0	0	0	0
TA483	south	sr		1918	16	3	2011	autumn	above	A28	363	F	A	N	0	0	0	0	0.2	0.2	0	0	0	0	0.1	0
TA484	south	sr		1918	16	3	2011	autumn	above	C12	4231	M		N	0	0	0.2	0	0.1	0	0	0	0	0	0	0.7
TA485	south	sr		1918	16	3	2011	autumn	above	A3		F	A	N	0	0	0	0	0.2	0	0	0	0	0	0.1	0.1
TA486	south	sr		1918	16	3	2011	autumn	above	A24		M	A	N	0	0	0	0	0.1	0.1	0	0	0	0	0.1	0.3
TA487	south	sr		1918	16	3	2011	autumn	above	A15		M	J	N	0	0	0	0	0	0	0	0	0	0	0	0
TA488	south	sr		1918	16	3	2011	autumn	above	A29		M	J	N	0	0	0	0	0	0	0	0	0	0	0.1	0
TA489	south	sr		1918	16	3	2011	autumn	above	B22		M		N	0	0.2	0.4	0.1	0.1	0	0	0	0	0	0	0
TA490	south	sr		1918	16	3	2011	autumn	above	B6		M		N	0	0.3	0	0	0	0.3	0	0	0	0.1	0	0
TA491	south	cp		1776	17	3	2011	autumn	above	A2		M	J	Y	0	0	0	0	0	0	0	0	0	0	0	0
TA492	south	cp		1776	16	3	2011	autumn	above	D4	4480	F		Y	0	0	0	0	0	0	0	0	0	0	0.1	0
TA493	south	cp	cpc	1776	16	3	2011	autumn	above		4740			Y	0	0.1	0	0	0.3	0	0	0	0	0.3	0	0.1
TA494	south	cp		1776	17	3	2011	autumn	above	B20				Y	0	0	0	0.1	0.1	0	0	0	0	0	0	0
TA495	south	cp		1776	16	3	2011	autumn	above	D18	4732	M		Y	0	0	0	0	0.3	0	0	0	0	0	0.1	0.1
TA496	south	cp		1776	16	3	2011	autumn	above	A4	4751	M	J	Y	0	0.1	0	0	0	0	0	0	0	0	0.2	0
TA497	south	cp	cpv	1776	15	3	2011	autumn	above		4616	M	J	N	0	0	0	0	0.1	0	0	0	0	0.1	0	0
TA498	south	cp		1776	16	3	2011	autumn	above		4720	F		N	0.1	0	0	0	0.2	0	0	0	0	0	0	0
TA499	south	cp	cpv	1776	15	3	2011	autumn	above		4686	F	J	N	0	0	0	0	0	0	0	0	0	0	0	0
TA500	south	cp		1776	15	3	2011	autumn	above		333	F	A	N	0	0	0	0	0.2	0	0	0.1	0	0	0	0
TA501	south	cp		1776	15	3	2011	autumn	above		4334	F		N	0	0	0	0	0	0	0	0	0	0	0.1	0
TA502	south	cp		1776	15	3	2011	autumn	above			F	A	N	0.1	0	0	0	0	0	0	0	0	0	0	0
TA503	south	cp		1776	15	3	2011	autumn	above		480	F		N	0.5	0	0.2	0	0	0	0	0	0.3	0	0	0
TA504	south	cp	cpv	1776	15	3	2011	autumn	above		4693	F	J	N	0.1	0	0	0.4	0	0	0	0	0	0	0	0
TA505	south	cp		1776	15	3	2011	autumn	above		4299	F		N	0	0	0	0	0.5	0.1	0	0	0	0	0.2	0
TA506	south	cp		1776	15	3	2011	autumn	above		4717	F	J	N	0	0	0	0.2	0	0	0	0	0	0	0	0
TA507	south	cp	cpv	1776	15	3	2011	autumn	above		4290	M	A	N	0	0.1	0	0	0	0	0	0	0.8	0	0	0.1
TA508	south	cp		1776	15	3	2011	autumn	above		4249	F	J	N	0.4	0.1	0	0	0	0	0	0	0	0	0	0
TA509	south	cp	cpv	1776	15	3	2011	autumn	above		4417	F	A	N	0	0	0	0.2	0	0.1	0	0	0	0	0.2	0
TA510	south	cp		1776	7	2	2011	summer	above		368	F	A	Y	0	0	0	1	0	0	0	0	0	0	0	0
TA511	south	cp		1776	7	2	2011	summer	above	D4	4433	F	A	Y	0	0	0	0.7	0	0	0	0	0	0	0	0
TA512	south	cp		1776	7	2	2011	summer	above	B15	4721	F	J	Y	0	0	0	1	0	0	0	0	0	0	0	0
TA513	south	cp		1776	7	2	2011	summer	above	D18	4720	F	J	Y	0	0	0	1	0	0	0	0	0	0	0	0
TA514	south	cp		1776	7	2	2011	summer	above	D8	4459	M	A	Y	0	0	0	1	0	0	0	0	0	0	0	0
TA515	south	cp		1776	7	2	2011	summer	above	D9		F	A	Y	0	0	0	0.1	0	0	0	0	0	0.1	0	0
TA516	south	wr		1680	23	11	2013	spring	above	C3	DE241	M		Y	0	0	0.2	0.4	0.1	0	0	0	0	0	0	0
TA517	south	wr		1680	22	11	2013	spring	above	D9	DC7A5	M		Y	0	0	0	1	0	0	0	0	0	0	0	0
TA518	south	wr		1680	22	11	2013	spring	above	D3	D9657	M		Y	0	0	0	0.7	0.1	0	0	0	0	0	0	0
TA519	south	wr		1680	21	11	2013	spring	above	B16	DE4F8	F	A		0	0	0	0.8	0	0	0	0	0	0	0	0
TA520	south	wr		1680	21	11	2013	spring	above	D6	DC0FC	F		Y	0.8	0.1	0	0	0	0	0	0	0	0	0	0
TA521	south	wr		1680	23	11	2013	spring	above	D13	D4682	F		Y	0.3	0.1	0	0.6	0	0	0	0	0	0	0	0
TA522	south	cp		1776	17	11	2013	spring	above	D6	DC13A				0	0	0	0.3	0	0.2	0	0	0	0	0	0
TA523	south	cp		1776	17	11	2013	spring	above	D13	60A2	F	A		0	0.2	0.4	0	0	0	0	0	0	0	0.3	0
TA524	south	cp	cpa	1776	19	11	2013	spring	above	A21	DAEA8	F		Y	0	0	0	0.8	0	0	0	0	0	0	0	0
TA525	south	cp	cp	1776	17	11	2013	spring	above	D18	D87F	F	A		0.5	0.2	0	0.3	0	0	0	0	0	0	0	0
TA526	south	cp		1776	17	11	2013	spring	above	D21	D697	F	A		0	0	0	0	0	0	0	0	0	0	0	0
TA527	south	cp		1776	17	11	2013	spring	above	A20	72DDBC	M		Y	0	0	0	1	0	0	0	0	0	0	0	0
TA528	south	cp		1776	17	11	2013	spring	above	B23		M			0	0	0	0.1	0	0	0	0	0	0	0	0
TA529	south	cp		1776	17	11	2013	spring	above	T19		F			0	0	0	0	0	0	0	0	0	0	0	0
TA530	south	cp		1776	17	11	2013	spring	above	25	DC95F	M	A		0	0	0.1	0.7	0.1	0	0	0	0	0	0	0
TB224	south	bc		1918		12	1999	spring	above		1856	m			0	0	0	0.5	0.1	0.1	0	0	0.1	0	0.2	0
TB225	south	bc		1918		12	1999	spring	above		2177	f			0	0	0.1	0.5	0	0.6	0.1	0	0	0	0.3	0
TB226	south	bc		1918		12	1999	spring	above		1743	f			0.1	0.3	0	0.1	0	0.7	0.2	0	0.2	0	0.3	0.1
TB227	south	bc		1918		12	1999	spring	above		3236	f			0	0	0	0.8	0	0.2	0	0	0	0	0.2	0
TB228	south	bc		1918		12	1999	spring	above		1863	f			0.1	0	0	0.1	0	0.3	0.2	0	0.7	0	0.4	0
TB229	south	bc		1918		12	1999	spring	above		3300	m			0	0	0	1	0	0.3	0	0	0.5	0	0	0
TB230	south	bc		1918		12	1999	spring	above		2177	f			0	0.4	0	0	0.5	0.7	0	0	0.2	0	0.2	0
TB231	south	bc		1918		12	1999	spring	above		3227	f			0	0.2	0	0.9	0.1	0.2	0	0	0	0	0	0
TB232	south	bc		1918		12	1999	spring	above		1858	f			0.3	0	0	1	0	0.5	0	0	0	0	0	0
TB233	south	cp	cp	1918		12	1999	spring	above		2075	f			0	0	0	1	0	0.3	0	0.3	0	0	0	0
TB234	south	cp	cp	1918		12	1999	spring	above		2147	f			0.3	0	0.5	0.3	0	1	0	0	0	0.3	0.3	0
TB235	south	cp	cp	1918		12	1999	spring	above		1837	m			0.2	0	0.1	0.7	0	1	0.2	0.3	0.1	0	0	0
TB236	south	cp	cp	1918		12	1999	spring	above		1430	m			0.4	0	0.5	0.7	0	1.6	0.2	0	0.8	0.1	0	0
TB237	south	cp	cp	1918		12	1999	spring	above		1679	f			0.1	0	0.5	0.7	0	1.1	0	0	1	0.4	0	0
TB238	south	cp	cp	1918		12	1999	spring	above		3291	f			0	0	0.9	0.7	0	1.8	0.3	0	0	0	0.2	0
TB239	south	cp	cp	1918		12	1999	spring	above		1509	m			0	0	0	1	0	0.2	0	0	0	0.4	0	0
TB240	south	par	par	1918		12	1999	spring	above		1849	f			0.2	0.5	0	0	0	1.1	0	0	0	0.1	0.5	0
TB241	south	par	par	1918		12	1999	spring	above		3293	m			0	0.3	0.1	0.3	0	0.4	0	0	0	0	0.1	0
TB242	south	par	par	1918		12	1999	spring	above		3292	m			0.1	0	0	1	0	0.1	0	0	0	0	0.7	0
TB243	south	par	par	1918		12	1999	spring	above		1649	f			0	0	0	0.9	0	0.5	0	0	0	0.1	0.1	0
TB244	south	par	par	1918		12	1999	spring	above		1810	f			0.2	0	0.1	0.8	0	1.2	0.5	1	0	0	0.1	0
TB245	south	par	par	1918		12	1999	spring	above		1779	f			0	0	0.1	0	0	1.4	0.4	0	0	0	1	0
TB246	south	sr	sr	1918		12	1999	spring	above		3276	f			0.2	0	0.2	0	0	1.1	0	0	0.1	0.5	0.3	0
TB247	south	sr	sr	1918		12	1999	spring	above		3289	f			0.1	0	0.4	0.1	0.3	1.2	0	0.7	0.1	0.2	0.1	0
TB248	south	sr	sr	1918		12	1999	spring	above		3296	m			0	0	0.2	0.1	0	0.6	0	0.4	0	0.3	0.1	0
TB249	south	sr	sr	1918		12	1999	spring	above		2063	m			0.1	0	0.3	0.2	0	1.1	0.2	0.4	0	0	0.1	0
TB250	south	sr	sr	1918		12	1999	spring	above		1890	m			0	0	0	0.1	0	0	0	0	0	0	0	0
TB251	south	sr	sr	1918		12	1999	spring	above		1871	m			0.2	0	0.7	0	0	2	0	0.1	0	0.4	0.1	0
TB252	south	bc		1867		12	2000	spring	above		3350	f			0.5	0	0.8	0.1	0	1.1	0	0	0	0.1	0.2	0.1
TB253	south	bc		1867		12	2000	spring	above		1993	f			0.1	0.1	0	0	0.1	0.7	0.4	0	0.1	0	0.3	0
TB254	south	bc		1867		12	2000	spring	above		3444	f			0.2	0.2	0.2	1	0	1.2	0.3	0.1	0	0	0	0
TB255	south	bc		1867		12	2000	spring	above		3230	m			0	0	0	0.2	0	0	0	0	0	0	0	0
TB256	south	cp	cp	1776		12	2000	spring	above			m			0	0	0	1	0	0.1	0	0	0	0	0	0
TB257	south	cp	cp	1776		12	2000	spring	above		3039	m			0	0	0	1	0	0	0	0	0	0.3	0	0
TB258	south	cp	cp	1776		12	2000	spring	above		2072	f			0	0.2	0	0	0	0.9	0.2	0.5	0	0	0	0
TB259	south	cp	cp	1776		12	2000	spring	above		2077	f			0	0.6	0.3	1	0	1	0	0	0	0	0	0
TB260	south	cp	cp	1776		12	2000	spring	above		3271	m			0	0.8	0	0	0	0.9	0	0	0.1	0	0	0
TB261	south	cp	cp	1776		12	2000	spring	above		3013	f			0.4	0.1	0	0.8	0	0.9	0.2	0	0	0.1	0	0
TB262	south	par	par	1798		12	2000	spring	above		3293	m			0.1	0	0	0.1	0	1.5	0	0.9	0	0	0	0
TB263	south	par	par	1798		12	2000	spring	above		3240	f			0	0	0.1	0	0	1	0.2	0.8	0	0.2	0.5	0
TB264	south	par	par	1798		12	2000	spring	above		3194	m			0.1	0	1	0.1	0	1.1	0.1	0	0	0	0	0
TB265	south	par	par	1798		12	2000	spring	above		3142	f			0	0	0	0	0	0.3	0	0.2	0	0	0.4	0
TB266	south	par	par	1798		12	2000	spring	above		3388	f			0.4	0.3	0.1	0.3	0	1	0.1	0	0	0	0	0
TB267	south	par	par	1798		12	2000	spring	above		1810	f			0	0.2	0.2	0	0	0.4	0	0	0	0	0.1	0
TB268	south	par	par	1798		12	2000	spring	above		3258	m			0.2	0	0	0	0.2	0.7	0	0.4	0	0	0	0
TB269	south	par	par	1798		12	2000	spring	above		3151	m			0.1	0	0	0	0	0.4	0.2	0	0	0	0.3	0
TB270	south	sr	sr	1918		12	2000	spring	above		3061	m			0.4	0	0	0.3	0	1.1	0	0.7	0	0.1	1	0
TB271	south	sr	sr	1918		12	2000	spring	above		3281	f			0	0	0.1	0.6	0.1	0.1	0	0	0	0.8	1	0
TB272	south	sr	sr	1918		12	2000	spring	above		3468	f			0.1	0.3	0	0.4	0	0.8	0	0	0	0.3	0	0
TB273	south	sr	sr	1918		12	2000	spring	above		3160	m			0.4	0.6	0	0	0	1.1	0.3	0.2	0	0	0.2	0
TB274	south	sr	sr	1918		12	2000	spring	above		3154	m			0	0.4	0	1	0	0.4	0	0	0	0.4	0.1	0
TB275	south	sr	sr	1918		12	2000	spring	above		3296	m			0.1	0.1	0	0	0	1.1	0	0.6	0	0.1	0.2	0.2
TB276	south	towns	towns	2028		12	2000	spring	above		3463	f			0	0	0.7	0.9	0.1	0.7	0	0	0.1	0	0.3	0.1
TB277	south	towns	towns	2028		12	2000	spring	above		3034	f			0.1	0	0.1	1	0	0.2	0	0	0	0	0.2	0
TB278	south	towns	towns	2028		12	2000	spring	above		3076	f			0	0.1	0.5	1	0	0.9	0	0	0	0	0.1	0
TB279	south	towns	towns	2028		12	2000	spring	above		3451	f			0	0	0	0	0	0.7	0	0	0	0	0	0
TB280	south	towns	towns	2028		12	2000	spring	above		3055	f			0	0.6	0.2	0.6	0	1.2	0	0.5	0	0	0.1	0
TB281	south	bc		1867		12	2001	spring	above		3089	f			0	0	0	1	0.1	0	0	0	0.1	0	0.2	0
TB282	south	bc		1867		12	2001	autumn	above			m			0	0	0	0.1	0	0.1	0	0	0	0	0	0
TB283	south	bc		1867		12	2001	spring	above		3239	f			0.2	0	0.3	1	0	0.5	0	0	0	0	0	0
TB284	south	bc		1867		12	2001	spring	above		3239	f			0.4	0	0	0.6	0.1	0.6	0	0	0	0.1	0.2	0
TB285	south	bc		1867		12	2001	autumn	above		3424	m			0	0	0	0	0	0	0	0	0	0	0	0
TB286	south	bc		1867		12	2001	spring	above		3334	f			0	0	0.2	0	0	1	0.6	0	0	0	1	0
TB287	south	bc		1867		12	2001	spring	above		3229	m			0	0	0	1	0	0.1	0	0	0	0.1	0.1	0
TB288	south	bc		1867		12	2001	spring	above		3336	f			0	0	0.1	1	0	0.1	0	0	0	0.1	1	0
TB289	south	bc		1867		12	2001	autumn	above		3230	m			0.9	0	0	0	0.2	1	0	0	0	0	0	0
TB290	south	bc		1867		12	2001	spring	above		3262	m			0	0	0	0.5	0	0.1	0	0	0	0	0.2	0
TB291	south	cp	cp	1776		12	2001	spring	above		3362	m			0	0.1	0.8	0.3	0	1.5	0	0	0	0	0.5	0
TB292	south	cp	cp	1776		12	2001	spring	above		3423	f			0.2	0	0.5	0.9	0	0.8	0	0	0	0	0	0
TB293	south	cp	cp	1776		12	2001	spring	above		2072	f			0	0	0.4	0.5	0	0.9	0	0	0	0.1	0	0
TB294	south	cp	cp	1776		12	2001	spring	above		2077	f			0	0.1	0	0.5	0	0.3	0	0	0	0.2	0.3	0
TB295	south	cp	cp	1776		12	2001	spring	above		3546	f			0	0.2	0.1	1	0	0.6	0.2	0	0	0.1	0.2	0.1
TB296	south	par	par	1798		12	2001	spring	above		3293	m			0.2	0	0	0.2	0.4	0.2	0	0	0	0.1	0.1	0
TB297	south	par	par	1798		12	2001	spring	above		3379	f			0	0	0	1	0	0.1	0	0	0	0.5	0.2	0
TB298	south	par	par	1798		12	2001	spring	above			f			0	0	0	1	0.3	0.4	0	0	0.1	0	0.2	0
TB299	south	par	par	1798		12	2001	spring	above		1649	f			0.5	0	1	0.2	0	1.5	0	0	0.3	0.1	0.4	0
TB300	south	par	par	1798		12	2001	spring	above		3142	f			0	0.2	0.2	0.1	0	0.6	0	0	0	0.1	0	0
TB301	south	par	par	1798		12	2001	spring	above		3279	f			0	0	0.1	1	0	0.8	0	0	0	0	0.1	0
TB302	south	par	par	1798		12	2001	spring	above		3409	f			0.1	0.1	0.2	0.6	0	0.5	0.1	0	0	0.2	0.7	0
TB303	south	sr	sr	1918		12	2001	spring	above		3260	m			0.3	0	0.3	1	0	1.4	0.3	0	0	0.2	0.4	0
TB304	south	sr	sr	1918		12	2001	spring	above		3048	f			0.2	0.1	1	0	0	1.3	0.1	0	0.1	0.2	0.7	0
TB305	south	sr	sr	1918		12	2001	spring	above		3468	f			0.1	0	0	0	0.1	1	0.9	0	0	0.2	0.2	0
TB306	south	sr	sr	1918		12	2001	spring	above		3296	m			0.4	0.3	0	0	0	0.9	0	0.2	0	0.1	0	0
TB307	south	towns	towns	2028		12	2001	autumn	above		3047	f			0	0	0	0.4	0	0	0	0	0	0	0	0
TB308	south	towns	towns	2028		12	2001	autumn	above		3306	f			0	0	0.2	0.7	0	0.2	0	0	0	0	0	0
TB309	south	towns	towns	2028		12	2001	autumn	above		3346	f			0.3	0	0	0	0	0.4	0	0	0	0	0	0
TB310	south	towns	towns	2028		12	2001	autumn	above		3173	f			0	0	0	0.1	0	0	0	0	0	0	0.2	0
TB311	south	towns	towns	2028		12	2001	autumn	above			m			0	0	0	0.1	0	0.1	0	0	0.1	0.3	0.5	0
TB312	south	towns	towns	2028		12	2001	autumn	above		3455	f			0	0	0	0	0	0	0	0	0	0	0	0
TB48	south	bc		1867		12	1996	spring	above		2010	f			0.3	0.1	0.1	0.8	0	0.5	0	0	0	0	0	0
TB49	south	bc		1867		12	1996	spring	above		1323	f			0.3	0.3	0	0.7	0	1.2	0.1	0	0.2	0	0	0
TB50	south	bc		1867		12	1996	spring	above		1251	f			0	0	0	0.7	0.2	0.6	0	0	0	0.3	0.7	0.2
TB51	south	bc		1867		12	1996	spring	above		1148	f			0	0	0.1	1	0	0.2	0	0	0	0	0.3	0.1
TB52	south	bc		1867		12	1996	spring	above		1593	m			0	0	0.1	0.8	0	0.4	0	0	0	0.3	0.1	0
TB53	south	bc		1867		12	1996	spring	above		1346	m			0	0	0	0.9	0	1.3	0.8	0	0	0.6	0.2	0
TB54	south	bc		1867		12	1996	spring	above		1232	m			0	0	0.7	0.7	0.2	0.8	0	0	0	0	0.2	0
TB55	south	bc		1867		12	1996	spring	above		1514	m			0	0	0.1	1	0	0.2	0	0	0.1	0	0.2	0
TB56	south	bc		1867		3	1996	autumn	above		1598	m			0	0.7	0.6	0	0.5	1.1	0.1	0	0	0	0.4	0
TB57	south	bc		1867		3	1996	autumn	above		1251	f			0	0	0	0	0.4	0.2	0	0	0.6	0	0.5	0
TB58	south	bc		1867		3	1996	autumn	above		1543	f			0.3	0.8	0.3	0	0	1.2	0	0	0.3	0	0.1	0.8
TB59	south	bc		1867		3	1996	autumn	above		1232	f			0	0	0	1	0	0	0	0	0	0	0	0
TB60	south	bc		1867		3	1996	autumn	above		1248	m			0	0	0	0	0.2	0.1	0	0	0.1	0	0	0
TB61	south	bc		1867		3	1996	autumn	above		1484	f			0	0	0	0	0	0	0	0	0	0	0.1	0
TB62	south	cp	cp	1776		12	1996	spring	above		1701	m			0	0	0	1	0.1	0.1	0	0	0	0	0	0
TB63	south	cp	cp	1776		12	1996	spring	above		1430	m			0	0	0.1	1	0.2	0.4	0	0	0	0	0.4	0
TB64	south	cp	cp	1776		12	1996	spring	above		1429	f			0	0	0.3	1	0	0.7	0	0.2	0.1	0.3	0.2	0
TB65	south	cp	cp	1776		12	1996	spring	above		2045	f			0	0	0	0.1	0	1.1	0.3	0.2	0	0.1	0.2	0
TB66	south	cp	cp	1776		12	1996	spring	above		1462	m			0	0	0.1	0.8	0	0.1	0	0	0	0	0	0
TB67	south	cp	cp	1776		12	1996	spring	above		1430	f			0	0	0	0.9	0	0.2	0	0	0	0	0.2	0
TB68	south	cp	cp	1776		12	1996	spring	above		1325	m			0	0	0	0.6	0.4	0.1	0	0	0	0.3	0.5	0
TB69	south	cp	cp	1776		12	1996	spring	above		8094	f			0	0	0	1	0	0.1	0.1	0	0	0.1	0	0
TB70	south	cp	cp	1776		12	1996	spring	above		1411	m			0	0	0	0.8	0.1	0.1	0	0	0	0	0.5	0
TB71	south	cp	cp	1776		3	1996	autumn	above		7733	f			0	0.2	0.6	0	0.4	1.2	0	0	0	0.1	0.1	0.6
TB72	south	cp	cp	1776		3	1996	autumn	above		1502	m			0	0	0	0	0	0.4	0	0	0	0	0.1	1
TB73	south	cp	cp	1776		3	1996	autumn	above		1256	f			0	0	0	0	0	0.7	0	0	0	0.2	1	0
TB74	south	cp	cp	1776		3	1996	autumn	above		1546	f			0	0	0.6	0	0	0.6	0	0	0.3	0.1	1	0.9
TB75	south	cp	cp	1776		3	1996	autumn	above		1373	f			0.2	0.5	0	0	0	1.1	0	0.1	0.8	0.9	0.3	0
TB76	south	cp	cp	1776		3	1996	autumn	above		1464	m			0	0.1	0	0	0	0.1	0	0	0	0	0.9	0.7
TB77	south	cp	cp	1776		3	1996	autumn	above		1414	f			0.1	0.4	0.1	0	0	1.1	0	0	0	0	0.5	0
TB78	south	par	par	1798		12	1996	spring	above		1522	f			0	0	0	0.6	0	0	0	0	0	0	0	0.1
TB79	south	par	par	1798		12	1996	spring	above		1703	f			0.1	0	0.5	0.3	0	1.6	0.2	0.2	0	0	0	0
TB80	south	par	par	1798		12	1996	spring	above		1624	f			1.5	0.2	0	0	0	1.7	0	0.1	0	0.1	0.1	0
TB81	south	par	par	1798		12	1996	spring	above		1600	f			1	0	0	0.2	0	1.3	0	0.2	0	0	0.1	0.5
TB82	south	par	par	1798		12	1996	spring	above		1709	f			1	0	0	0	0	1	0.1	0	0	0	0	0
TB83	south	par	par	1798		3	1996	autumn	above		1517	f			0.2	0.9	0	0.4	0	1.2	0	0	0	0.1	0.1	1
TB84	south	par	par	1798		3	1996	autumn	above		1590	f			0	0	0	0.8	0.2	0	0	0	0.1	0	0	0
TB85	south	par	par	1798		3	1996	autumn	above		1518	f			0	0.1	0	0	0	0.1	0	0	0.4	0.7	0	1
TB86	south	par	par	1798		3	1996	autumn	above		1600	f			0.1	0.1	0	0	0	0.4	0	0	0.1	0	0.8	0.7
TB87	south	par	par	1798		3	1996	autumn	above		7717	f			0	0.7	0.1	0	0	1.3	0	0	0	0	1	0
TB88	south	par	par	1798		3	1996	autumn	above		1524	f			0.1	0.2	0.3	0	0	1	0	0	0.4	0.1	0.1	0
TB89	south	sr	sr	1918		12	1996	spring	above			f			0	0	0	0.4	0	0.5	0	0.4	0	0.1	0	0
TB90	south	sr	sr	1918		12	1996	spring	above		1583	m			0.2	0	0.5	0.2	0	1.2	0	0.6	0	0.1	0.1	0
TB91	south	sr	sr	1918		12	1996	spring	above		1555	f			0	0.2	0.3	0.7	0	1.4	0.3	1	0	0.5	0	0
TB92	south	sr	sr	1918		12	1996	spring	above		1633	f			0.1	0.1	0.1	1	0	0.7	0	0.2	0	0.1	0.1	0
TB93	south	sr	sr	1918		12	1996	spring	above		1150	f			0	0	0	0.7	0.2	1.1	0	0.7	0	0.1	0.2	0.2
TB94	south	sr	sr	1918		12	1996	spring	above		1723	m			0	0	0.1	0.4	0	0.1	0	0	0	0	0.1	0
TB95	south	sr	sr	1918		12	1996	spring	above		1638	m			0.1	0	0	0.7	0	1	0	0.9	0	0	0.8	0
TA104	south	par		1798	24	11	2014	spring	below	C15	4065			Y	0.4	0.3	0	0	0	0	0	0	0	0	0.1	0
TA105	south	par		1798	23	11	2014	spring	below	C3	D3A77			Y	0	0	0	0.1	0	0	0	0	0	0	0	0
TA106	south	par		1798	24	11	2014	spring	below	E21	D2A61			Y	0	0	0	0	0	0	0	0	0	0	0	0
TA107	south	par		1798	22	11	2014	spring	below	C4	D4846	M	A		1	0	0	0	0	0	0	0	0	0	0	0
TA108	south	par		1798	22	11	2014	spring	below	C21		F	A		0	0	1	0	0	0	0	0	0	0	0	0
TA109	south	par		1798	22	11	2014	spring	below	A7		F	A		0	0.2	0.3	0.6	0	0	0	0	0	0	0	0
TA110	south	par		1798	21	11	2014	spring	below	B23	D464B	F	A		0.4	0	0	0	0	0	0	0	0	0	0	0
TA111	south	par		1798	21	11	2014	spring	below	B2	D3005	M			0.1	0.1	0	0.1	0	0.4	0	0	0	0	0	0
TA112	south	par		1798	21	11	2014	spring	below	A25	DB4FE	F	A		0.9	0	0	0.5	0	0	0	0	0	0	0	0
TA113	south	par		1798	21	11	2014	spring	below	C23	D6A09	F	J		0	0	0	0	0	0.8	0	0	0	0	0	0
TA114	south	par		1798	21	11	2014	spring	below	A15	D5A10	F	A		0	0	0	0.7	0	0	0	0	0	0	0	0
TA115	south	par		1798	21	11	2014	spring	below	B24	D2AOA	F	A		0.2	0	0.2	0.3	0	0.1	0	0	0	0	0	0
TA116	south	sr		1918	15	11	2014	spring	below	A25	DB757	M	A		0.3	0	0	0	0	0	0	0	0	0	0	0
TA117	south	sr		1918	15	11	2014	spring	below	A20	D84EE	F	SA		0	0.1	0.8	0	0	0.2	0	0	0	0	0	0
TA118	south	sr		1918	15	11	2014	spring	below	C2	DA6AO	M			0.1	0	0.7	0.1	0	0.1	0	0	0	0	0	0
TA119	south	sr		1918	15	11	2014	spring	below	D9	D1D8B	F			0.3	0	0	0.7	0	0	0	0	0	0	0	0
TA120	south	sr		1918	15	11	2014	spring	below	D16	DA9A7	M			0.1	0	0	0	0.2	0	0.2	0	0.3	0	0	0
TA121	south	sr		1918	15	11	2014	spring	below	A28		M	A		0	0	0	0	0	0	0	0	0	0	0	0
TA122	south	sr		1918	15	11	2014	spring	below	B14	D93B7	F	J		0	0	0	0.2	0	0	0	0	0	0	0	0
TA123	south	sr		1918	15	11	2014	spring	below	D18	D2B77				0	0	0	0	0	0.2	0	0	0	0	0.3	0
TA124	south	sr		1918	15	11	2014	spring	below	C7	DD31E	F			0	0	0	0	0	0	0	0	0	0	0	0
TA125	south	sr		1918	15	11	2014	spring	below	C24	D8C85	F			0.6	0.1	0.2	0	0	0.1	0	0	0	0	0	0
TA126	south	sr		1918	15	11	2014	spring	below	A11		F	A		0	0	0	0.7	0	0	0	0	0.1	0	0	0
TA127	south	sr		1918	15	11	2014	spring	below	A2	D3F35	F	J		0.6	0	0	0	0	0	0	0	0	0	0	0
TA128	south	sr		1918	15	11	2014	spring	below	27		M	J		0	0	0	0.2	0	0	0	0	0	0	0	0
TA129	south	sr		1918	15	11	2014	spring	below	13C	D228C	F			0	0	0	0	0	0	0	0	0	0	0	0
TA130	south	bc	ubc	1867	18	11	2014	spring	below	E5	DB4CF	F			0	0	0.3	0.4	0.5	0	0	0	0	0	0	0
TA131	south	bc	ubc	1867	18	11	2014	spring	below	5	DEF2B	F			0.5	0	0	0	0	0.4	0	0	0	0.1	0	0
TA132	south	bc	ubc	1867	19	11	2014	spring	below	11	DA985	M			0.2	0.2	0	0.1	0	0	0	0	0.1	0	0	0
TA133	south	bc	bcp	1867	19	11	2014	spring	below	12	DD357	F	J		0.2	0.2	0	0	0	0	0	0	0.4	0	0	0
TA134	south	bc	ubc	1867	18	11	2014	spring	below	24	DB524	F			0	0.1	0.5	0.1	0.2	0	0	0	0	0	0	0
TA135	south	bc	bcp	1867	18	11	2014	spring	below	11	DAC57	F	J		0	0	0.1	0.7	0	0	0	0	0	0	0	0
TA136	south	bc	bcp	1867	17	11	2014	spring	below	17	D6181	F	J		0	0	0.1	0.1	0.2	0	0	0	0	0	0	0
TA137	south	bc	bcp	1867	19	11	2014	spring	below	32	DAE20	F			0	0.3	0	0	0.2	0	0	0	0.3	0	0	0
TA138	south	bc	lbc	1867	17	11	2014	spring	below	14		F			0	0	0	0	0.2	0.1	0	0	0.1	0	0.1	0
TA139	south	bc	bcp	1867	18	11	2014	spring	below	5	D6AC9	F	J		0.2	0.1	0	0.3	0	0.1	0	0	0	0	0	0
TA140	south	bc	bcp	1867	18	11	2014	spring	below	17	DA406	M	J		0	0.1	0	0	0.1	0	0	0	0.3	0	0	0
TA141	south	bc	bcp	1867	1	11	2014	spring	below	5	UROBC8E	F	A		0	0.1	0	0.2	0	0	0	0	0	0	0.4	0
TA142	south	bc	bcp	1867	17	11	2014	spring	below	26	D9960	F	A		0.1	0	0.2	0	0	0.1	0	0	0.9	0	0	0
TA143	south	bc	bcp	1867	19	11	2014	spring	below	28	D946F	F	A		0	0.5	0.3	0	0	0	0	0	0	0	0	0
TA144	south	bc	bcp	1867	18	11	2014	spring	below	29	DD049	F	J		0	0.2	0	0	0	0.1	0	0	0.3	0	0.1	0
TA145	south	bc	lbc	1867	17	11	2014	spring	below	15	D33C3	F			0.1	0.2	0	0	0	0	0	0	0	0	0.7	0
TA146	south	bc	bcp	1867	19	11	2014	spring	below	14	DCD06	F	J		0.1	0	0	0	0	0	0	0	0	0	0	0
TA147	south	cp		1776	19	11	2014	spring	below	B15	DD499				0	0	0.5	0.9	0	0	0	0	0	0	0	0
TA148	south	cp		1776	19	11	2014	spring	below	B4	D3579	F			0	0	0.3	0	0	0.1	0	0	0	0.2	0	0
TA149	south	cp		1776	19	11	2014	spring	below	D24	DAD9B	F			0	0.1	0	0	0.1	0	0	0	0	0	0.4	0
TA150	south	cp		1776	19	11	2014	spring	below	C9	DDB47	M	J		0	0.6	0.4	0	0	0	0	0	0	0	0	0
TA151	south	cp		1776	19	11	2014	spring	below	D8	D2654	M	A		0	0	0	0.3	0.2	0	0	0	0	0	0.1	0
TA152	south	cp		1776	19	11	2014	spring	below	A23	D5EF1	F			0	0	0.3	0.4	0.1	0.1	0	0	0	0	0	0
TA153	south	cp		1776	19	11	2014	spring	below	A24	BC34	F			0	0	0.6	0	0	0	0	0	0	0	0	0
TA154	south	cp		1776	19	11	2014	spring	below	D3	DB2DB	M	J		0	0	0	0	0	0	0	0	0	0	0	0
TA155	south	cp		1776	19	11	2014	spring	below	D7	D1C12	M	A		0	0.2	0	0.2	0	0	0	0	0	0	0	0
TA156	south	cp		1776	19	11	2014	spring	below	4	D60A2	F	A		0	0.2	0.1	0	0	0	0	0	0	0	0.6	0
TA157	south	cp		1776	19	11	2014	spring	below	D25	DB93A	M	J		0	0.3	0	0.7	0	0	0	0	0	0	0	0
TA158	south	cp		1776	19	11	2014	spring	below	B22	24B7	F			0	0	0	0.2	0	0.1	0	0	0	0	0.1	0
TA159	south	cp		1776	19	11	2014	spring	below	B2	D8838	M			0	0	0	0	0	0	0	0	0	0	0	0
TA160	south	cp		1776	19	11	2014	spring	below	D18	DA685	M	J		0	0.2	0.4	0	0	0	0	0	0.4	0	0	0
TA161	south	cp		1776	19	11	2014	spring	below	C4	D8747	F	J		0	0	0.4	0	0	0.1	0	0	0	0	0.1	0
TA162	south	cp		1776	19	11	2014	spring	below	D6	D50D6	F	A		0	0.4	0	0	0	0.2	0	0	0.1	0	0	0
TA163	south	cp		1776	19	11	2014	spring	below	B24	3C76	M			0	0	0	0.8	0	0	0	0	0	0	0	0
TB153	south	bc		1867		12	1998	spring	below		1154	m			0.1	0	0	1	0.4	0.1	0	0	0.1	0	0	0
TB154	south	bc		1867		3	1998	autumn	below		2095	f			0.5	0.5	0	0.5	0	1.2	0	0	0	0.1	0.3	0
TB155	south	bc		1867		3	1998	autumn	below		2054	f			0	0.2	0	0.1	0.3	0.2	0	0	0	0.1	0	0
TB156	south	bc		1867		3	1998	autumn	below		1926	f			0	0	0.5	0	0.1	0.5	0	0	0.4	0.1	0.2	0
TB157	south	bc		1867		3	1998	autumn	below		1232	f			0.9	0.2	0.2	0	0	1	0	0	1	0	0.1	0
TB158	south	bc		1867		3	1998	autumn	below		1532	f			0.4	0.1	0.2	0.1	0	0.7	0	0	0.8	0	0.3	0.6
TB159	south	bc		1867		3	1998	autumn	below		1526	f			0.1	0	0	0	0.2	0.3	0	0	0.1	0.3	0	0
TB160	south	bc		1867		12	1998	spring	below		1986	f			0.3	0.6	0.4	0.5	0	2	0.2	0	0	0.1	0.4	0
TB161	south	bc		1867		12	1998	spring	below		1532	m			0	0	0	1	0.4	0.6	0	0	0.1	0	0.1	0
TB162	south	bc		1867		12	1998	spring	below		1895	m			0	0	0	0.5	0	0	0	0	0	0	0	0
TB163	south	bc		1867		12	1998	spring	below		1542	f			0	0.8	0.7	0.7	0	1.4	0.3	0	0	0.2	0.9	0
TB164	south	bc		1867		12	1998	spring	below		1697	f			0	1	0	1	0	1.5	0.1	0.2	0	0	0.1	0
TB165	south	bc		1867		12	1998	spring	below		1915	f			0	0	0	0.8	0	0	0	0	0.1	0	0	0
TB166	south	bc		1867		12	1998	spring	below		2139	m			0	0.1	0	1	0	0.2	0.1	0	0	0	0	0
TB167	south	bc		1867		12	1998	spring	below		2115	m			0	0	0	0.8	0.1	0.1	0	0	0	0	0	0
TB168	south	bc		1867		12	1998	spring	below		2091	m			0	0	0	0.3	0	0	0	0	0	0	0	0
TB169	south	bc		1867		12	1998	spring	below		1741	f			0	0.9	0	0.9	0	1.9	0.3	0.5	0.2	0	0	0
TB170	south	bc		1867		12	1998	spring	below		1850	m			0.3	0	0	1	0	0.6	0	0	0	0	1	0
TB171	south	cp	cp	1776		3	1998	autumn	below		2093	m			0	0.1	0.8	0	0	1.8	0	0	0	0	0.6	0
TB172	south	cp	cp	1776		3	1998	autumn	below		1801	m			0	0.1	0	0	0	0.1	0	0	0	0	0	0.4
TB173	south	cp	cp	1776		3	1998	autumn	below		1837	m			0	0	0.8	0	0	1.5	0	0	0	0	0.2	0.1
TB174	south	cp	cp	1776		3	1998	autumn	below		1886	f			0	0	1	0.2	0	1.2	0	0	0.2	0.1	0	0
TB175	south	cp	cp	1776		3	1998	autumn	below		1960	f			0.2	0.4	1	0	0	1.1	0	0.1	0	0.1	0.2	0.6
TB176	south	cp	cp	1776		3	1998	autumn	below		2075	f			0	0	0	0.2	0	0.5	0	0.3	0	0.6	0.5	0
TB177	south	cp	cp	1776		3	1998	autumn	below		2012	f			0.4	0	0.5	0	0	0.9	0	0	0	0.4	0	0
TB178	south	cp	cp	1776		3	1998	autumn	below		1803	f			0	0	0	0	0	0	0	0	0.8	0	0.8	0
TB179	south	cp	cp	1776		12	1998	spring	below		1659	f			0	0	0	1	0	0.2	0	0	0	0	0	0
TB180	south	cp	cp	1776		12	1998	spring	below		1563	f			0	0	0	1	0	0.5	0.1	0	0	0.1	0	0
TB181	south	cp	cp	1776		12	1998	spring	below		1946	m			0	0	0.1	1	0	0.1	0	0	0	0	0	0
TB182	south	cp	cp	1776		12	1998	spring	below		1759	m			0	0	0	0.9	0.1	0.5	0	0.1	0	0	0.4	0
TB183	south	cp	cp	1776		12	1998	spring	below		2174	f			0	0	0.2	1	0	0.2	0	0	0	0	0	0
TB184	south	cp	cp	1776		12	1998	spring	below		1834	f			0	0.7	0	1	0	0.9	0.1	0.1	0	0	0.1	0
TB185	south	cp	cp	1776		12	1998	spring	below		8099	f			0	0.5	0	1	0	1.3	0	0	0	0.1	0	0
TB186	south	cp	cp	1776		12	1998	spring	below		1509	m			0	0	0	1	0	0	0	0	0	0	1	0
TB187	south	cp	cp	1776		12	1998	spring	below		8043	m			0.2	0	0	0.9	0	0.3	0	0	0.1	0	0	0
TB188	south	cp	cp	1776		12	1998	spring	below		8043	m			0	0	0	1	0	0	0	0	0	0	0	0
TB189	south	cp	cp	1776		12	1998	spring	below		1430	m			0	0.1	0.2	0.6	0	1.1	0	0	0	0.1	0.3	0.4
TB190	south	kos	kn	2055		12	1998	spring	below		1952	f			0.1	0	0	0.3	0	0.1	0	0	0	0	0	0
TB191	south	kos	kp	2055		3	1998	autumn	below		1883	f			0	0	0.1	1	0	0.1	0	0	0	0	0	0
TB192	south	kos	kp	2055		3	1998	autumn	below		8007	m			0	0	0	1	0	0	0	0	0	0	0	0
TB193	south	kos	kp	2055		3	1998	autumn	below		1887	m			0	0	0	1	0.3	0.1	0	0	0.6	0	0	0
TB194	south	kos	kp	2055		3	1998	autumn	below		1883	f			0	0	0	1	0	0	0	0	0	0	0	0
TB195	south	kos	kp	2055		12	1998	spring	below		2199	m			0.2	0.2	0.1	0.2	0	1.1	0.7	0.8	0	0.2	0.3	0
TB196	south	kos	kp	2055		12	1998	spring	below		1958	f			0.4	0	1	1	0	1.1	0	0.2	0	0.1	0	0
TB197	south	kos	kp	2055		12	1998	spring	below		1820	f			0	0	0	0.1	0	0.3	0	0	0	0	0	0
TB198	south	kos	kp	2055		12	1998	spring	below		3193	f			0.1	0	0	0.9	0	0.5	0	0	0	0	0.6	0
TB199	south	kos	kp	2055		12	1998	spring	below		1848	f			0	0	0	1	0	0	0	0	0	0	0	0
TB200	south	par	par	1798		12	1998	spring	below		2082	f			0	0	0.1	1	0	0.5	0	0	0	0	1	0
TB201	south	par	par	1798		12	1998	spring	below		1695	f			0	0	0	0.6	0	0	0	0	0	0	0.1	0
TB202	south	par	par	1798		12	1998	spring	below		8054	f			0.1	0	0.1	0.5	0.4	0.5	0	0	0.1	0	0.1	0
TB203	south	par	par	1798		12	1998	spring	below		2096	f			0	0	0	0	0	0	0	0	0	0	0	0
TB204	south	par	par	1798		12	1998	spring	below		1610	f			0.1	0	0.3	0.4	0	0.5	0	0	0	0.2	0	0
TB205	south	par	par	1798		12	1998	spring	below		1779	f			0	0.1	1	0.5	0	1.2	0	0	0	0	0	0
TB206	south	par	par	1798		12	1998	spring	below		1657	m			0	0	0	1	0	0.1	0	0	0	0	0	0
TB207	south	par	par	1798		12	1998	spring	below		1833	f			0	0	0	0.4	0	0.4	0	0	0	0	0.3	0
TB208	south	sr	sr	1918		3	1998	autumn	below		8047	f			0	0	0	0	0	0.2	0	0	0	0	0.2	0
TB209	south	sr	sr	1918		3	1998	autumn	below		1836	f			0	0.2	0.2	0	0.3	0.6	0	0	0.3	0.3	0.6	0.3
TB210	south	sr	sr	1918		3	1998	autumn	below		2017	m			0.5	0	0	0	0	0.6	0	0	1	0	0.5	0
TB211	south	sr	sr	1918		3	1998	autumn	below		2081	m			0.3	0	0.1	0.1	0.1	0.7	0	0	0.7	0.6	0.1	0
TB212	south	sr	sr	1918		3	1998	autumn	below		1736	m			0.3	0.2	0.1	0.1	0.1	0.8	0	0	0.5	0.2	0.6	0
TB213	south	sr	sr	1918		3	1998	autumn	below		1956	m			0	0	0	0	0	0.1	0	0	0	0.5	0.1	0
TB214	south	sr	sr	1918		3	1998	autumn	below		1894	f			0.7	0	0	0	0	0.9	0	0.1	0	0	0.1	0.2
TB215	south	sr	sr	1918		12	1998	spring	below		2081	m			0	0.1	1	0.9	0	1.5	0	0	0	0.8	0	0
TB216	south	sr	sr	1918		12	1998	spring	below		1991	m			0	0.6	0.2	0.8	0	1	0	0	0	0	0	0
TB217	south	sr	sr	1918		12	1998	spring	below		1982	m			0	0	0.8	0.2	0	1.6	0	1	0	0.2	0	0
TB218	south	sr	sr	1918		12	1998	spring	below		2066	f			0.1	0.3	1	0	0.2	1	0	0.6	0	1	0	0
TB219	south	sr	sr	1918		12	1998	spring	below		1823	m			0	0	0.4	0.4	0	1.1	0	1	0	0.2	0	0
TB220	south	sr	sr	1918		12	1998	spring	below		1761	f			0	0	0	0.3	0	1.1	0.6	0.9	0	0.5	0.1	0
TB221	south	sr	sr	1918		12	1998	spring	below		1751	f			0	0.1	0	0.7	0.4	0.5	0	0	0	0	0.1	0
TB222	south	sr	sr	1918		12	1998	spring	below		2063	m			0	0.7	0	1	0	0.7	0	0	0	0	0.3	0
TB223	south	sr	sr	1918		12	1998	spring	below		1890	m			0	0	0	1	0	0.5	0	0	0	0	0	0
TB313	south	bc		1867		12	2002	spring	below		3262	m			0	0	0	1	0	0	0	0	0	0	0	0
TB314	south	bc		1867		12	2002	spring	below		4024	f			0	0	0	1	0	0	0	0	0	0	0	0
TB315	south	bc		1867		12	2002	spring	below		1660	f			0.2	0.3	0.1	0	0	0.8	0	0	0	0.2	0.2	0
TB316	south	cp	cp	1776		12	2002	spring	below		3011	f			0.2	0	0.3	0.6	0	0.7	0	0	0	0	0.3	0
TB317	south	cp	cp	1776		12	2002	spring	below		4070	m			0	0	0	0.3	0	0	0	0	0	0	0	0
TB318	south	cp	cp	1776		12	2002	spring	below		8013	m			0	0	0	0	0	0.4	0	0	0.1	0	0.2	0
TB319	south	cp	cp	1776		12	2002	spring	below		4047	m			0	0	0	0.7	0	0.9	0	0	0.2	0	0	0
TB320	south	cp	cp	1776		12	2002	spring	below		4073	f			0.1	0	0.1	1	0	0.3	0.1	0	0	0.1	0	0
TB321	south	cp	cp	1776		12	2002	spring	below		4063	m			0	0	0	1	0	0.6	0	0.1	0	0.6	0.4	0
TB322	south	par	par	1798		12	2002	spring	below		3487	m			0	0	0	0.5	0.2	0	0	0	0	0	0	0.3
TB323	south	par	par	1798		12	2002	spring	below		3293	m			0.1	0	0	0.6	0	0.2	0	0	0.1	0	0.2	0
TB324	south	par	par	1798		12	2002	spring	below		4008	f			0	0	0.1	0.9	0.1	0.1	0	0	0.2	0.3	1	0
TB325	south	par	par	1798		12	2002	spring	below		142	f			0	0	0	1	0	0	0	0	0	0	0	0
TB326	south	par	par	1798		12	2002	spring	below		4051	f			0	0.1	0	0.9	0	0.2	0	0.1	0	0	0.1	0.7
TB327	south	par	par	1798		12	2002	spring	below		3379	f			0	0.8	1	0	0	1.7	0	0	0	0	0	0
TB328	south	sr	sr	1918		12	2002	spring	below		4007	f			0.1	0.1	0	0.9	0	0.8	0	0.4	0	0.1	0.1	0
TB329	south	sr	sr	1918		12	2002	spring	below		3989	m			0.2	0	0.2	0	0.3	0.5	0	0.1	0	0.3	0.6	0
TB330	south	sr	sr	1918		12	2002	spring	below		3141	f			0.2	0	0	0	0	0.6	0.1	0.3	0	0.1	0.1	0
TB331	south	sr	sr	1918		12	2002	spring	below		4015	m			0	0	0	0.9	0	0.2	0	0.1	0	0.3	0	0
TB332	south	sr	sr	1918		12	2002	spring	below		4059	f			0	0.7	0.1	0.4	0	1.1	0	0	0	0.6	0	0
TB333	south	sr	sr	1918		12	2002	spring	below		1656	f			0	0	0	0	0	0.4	0	0	0	0.1	0.5	0
TB334	south	bc		1867		12	2003	spring	below		4162	f			0.4	0.8	1	0.5	0	1.3	0	0	0	0	0.1	0
TB335	south	bc		1867		12	2003	spring	below		4002	f			0.5	0.1	0	1	0	0.9	0	0	0.2	0	0.1	0
TB336	south	bc		1867		12	2003	spring	below		4205	f			0	0.8	0	0.4	0	1.5	0	0	0	0	0	0
TB337	south	bc		1867		12	2003	spring	below		3420	f			0	0	0	0.4	0.1	0	0	0	0	0	0	0
TB338	south	bc		1867		12	2003	spring	below		4153	m			0	0	0	0.7	0	0.3	0	0.1	0	0	0	0
TB339	south	bc		1867		12	2003	spring	below		3374	f			0	0	0.1	0.8	0.1	0.7	0	0	0	0.2	1	0
TB340	south	cp	cp	1776		12	2003	spring	below		4018	m			0	0	0	1	0	0.2	0	0	0	0.4	0.2	0
TB341	south	cp	cp	1776		12	2003	spring	below		3237	m			0	0.9	0	0.4	0	1.5	0	0	0	0	0.1	0
TB342	south	cp	cp	1776		12	2003	spring	below		4070	m			0.3	0.5	0	0	0	1	0	0	0	0.2	0.1	0
TB343	south	cp	cp	1776		12	2003	spring	below		8013	m			0	1	0.8	0.4	0.3	1.8	0	0	0	0	0.3	0
TB344	south	cp	cp	1776		12	2003	spring	below		4026	m			0	0	0	0.5	0	0	0	0	0.4	0	0	0
TB345	south	cp	cp	1776		12	2003	spring	below		3503	f			0	0	0.3	0.6	0.4	0.5	0	0	0.1	0	0	0
TB346	south	cp	cp	1776		12	2003	spring	below		4047	m			0	0	0	1	0	0.4	0	0	0	0.4	0	0
TB347	south	cp	cp	1776		12	2003	spring	below		3145	f			0.2	0.7	0	0.7	0	1	0	0	0	0	0.1	0
TB348	south	cp	cp	1776		12	2003	spring	below		4011	f			0.2	0	0.2	0.7	0	1.4	0	0	0	0.2	0.6	0
TB349	south	cp	cp	1776		12	2003	spring	below		2071	f			0	0	0	0.8	0	0.3	0	0	0	0	1	0
TB350	south	cp	cp	1776		12	2003	spring	below		two torn ears	m			0	0	0	1	0	0	0	0	0	0	0	0
TB351	south	par	par	1798		12	2003	spring	below		4215	f			0.1	0	0	0	0	0.2	0	0	0.6	0	0.1	0.1
TB352	south	par	par	1798		12	2003	spring	below		3414	f			0	0.6	0.8	0.3	0	1.8	0.1	0	0.1	0.2	0.3	0
TB353	south	par	par	1798		12	2003	spring	below		4118	f			0	0.3	0	0.7	0	1.3	0	0	0	0	0.3	0
TB354	south	par	par	1798		12	2003	spring	below		3916	f			1	0.2	0	0.2	0	1.5	0	0	0.3	0	0	0
TB355	south	par	par	1798		12	2003	spring	below		3443	f			0	0.1	0	0.2	0	0.9	0	0	0	0.1	0.7	0
TB356	south	par	par	1798		12	2003	spring	below		4029	f			0.2	0.9	0	0.4	0	1.2	0	0	0	0	0.1	0
TB357	south	par	par	1798		12	2003	spring	below		3494	f			0	0	0	1	0.2	1.1	0.4	0	0	0.4	1	0
TB358	south	par	par	1798		12	2003	spring	below		3488	f			0.6	0	0.1	0.9	0	0.9	0	0	0	0	0.5	0
TB359	south	par	par	1798		12	2003	spring	below		3500	f			0	0.8	0	0.6	0	2	0.4	0	0.3	0	0.1	0
TB360	south	sr	sr	1918		12	2003	spring	below		4048	m			0	0	1	0.1	0	1.1	0	0	0	0	0.4	0
TB361	south	sr	sr	1918		12	2003	spring	below		3486	f			0.7	0.2	1	1	0	2	0.1	0	0	0	0	0
TB362	south	sr	sr	1918		12	2003	spring	below		4012	f			0.1	0	0.1	0	0	0.5	0.1	0	0	0	0	0
TB363	south	sr	sr	1918		12	2003	spring	below		1656	f			0.7	0.1	1	1	0	1.6	0.1	0.7	0.5	0.1	0.1	0
TB364	south	sr	sr	1918		12	2003	spring	below		4013	f			0.1	0	1	0	0	2	0	0	0	0.5	0.3	0
TB365	south	sr	sr	1918		12	2003	spring	below		4155	m			0	0.5	1	0	0	1.8	0	0	0	0	0	0
TB366	south	sr	sr	1918		12	2003	spring	below		3919	f			0.7	0.2	1	0.5	0	2	0	0	0	0	0	0
TB367	south	sr	sr	1918		12	2003	spring	below		4130	m			0.5	0.4	1	0.1	0	1.3	0	0	0	0.1	0	0
TB368	south	sr	sr	1918		12	2003	spring	below		4161	m			0.1	0	0.1	1	0	0.2	0	0	0	0	0.2	0
TB369	south	sr	sr	1918		12	2003	spring	below		4007	f			0	0	0.8	0.7	0	1.4	0	0	0	0.6	0	0
TB370	south	sr	sr	1918		12	2003	spring	below		4059	m			0.1	0	0.6	0.2	0.7	2	0	0.4	0	0	0	0
TB371	south	sr	sr	1918		12	2003	spring	below		3492	m			0.1	0.2	0.2	0	0	2	0.9	0	0	0.1	0	0
TB372	south	sr	sr	1918		12	2003	spring	below		3473	m			0	0.1	0.9	0	0	1.9	0	0	0	0	0.3	0
TB373	south	bc		1867		12	2004	spring	below		4225	f			0.4	0	0	1	0.3	0.7	0	0.1	0	0.1	0.2	0
TB374	south	bc		1867		12	2004	spring	below		5083	m			0	0	0	0.9	0	0.1	0	0.1	0	0	0	0
TB375	south	bc		1867		12	2004	spring	below		3374	f			0	0.3	0.1	0.7	0	1.2	0	0	0	0.2	0.2	0
TB376	south	cp	cp	1776		12	2004	spring	below		4026	m			0	0	0	0.9	0	0	0	0	0	0	0.7	0
TB377	south	cp	cp	1776		12	2004	spring	below		4099	f			0	0.4	0	1	0	0.9	0.1	0	0	0	0.1	0
TB378	south	cp	cp	1776		12	2004	spring	below		4134	m			0.1	0	0	0.6	0.1	0.6	0	0	0.4	0	0.5	0
TB379	south	cp	cp	1776		12	2004	spring	below		2077	f			0	0	0.2	1	0	0.3	0	0	0	0	1	0
TB380	south	cp	cp	1776		12	2004	spring	below		4070	m			0	0	0	0.9	0	0	0	0	0	0	0.2	0
TB381	south	cp	cp	1776		12	2004	spring	below		3020	f			0.2	1	0.1	0.4	0.3	1.2	0	0	0	0	1	0
TB382	south	cp	cp	1776		12	2004	spring	below		3370	f			0.1	0.5	0	0.5	0	1.5	0.2	0	0	0.2	0.6	0
TB383	south	par	par	1798		12	2004	spring	below		3414	f			0.2	0.2	0.8	0.4	0.1	1.4	0	0.1	0.5	0.2	0	0
TB384	south	par	par	1798		12	2004	spring	below		5040	f			0	0.2	0.1	0.6	0	1.1	1	0.1	0	0	0.9	0
TB385	south	par	par	1798		12	2004	spring	below		4106	m			0	0	0.1	1	0	0.1	0	0	0	0	0.3	0
TB386	south	par	par	1798		12	2004	spring	below		4916	f			0	0	0.1	0.7	0	1	0.4	0	0	0	0.8	0
TB387	south	par	par	1798		12	2004	spring	below		4212	m			0	0.2	0	1	0.1	0.6	0.1	0.1	0.3	0	0.3	0
TB388	south	par	par	1798		12	2004	spring	below		5097	m			0	0	0	0.4	0	0.8	0	0	0	0	0.5	0
TB389	south	par	par	1798		12	2004	spring	below		4079	m			0.1	0.4	0	0.4	0.3	0.6	0	0	0	0	0.8	0
TB390	south	par	par	1798		12	2004	spring	below		4029	f			0	0	0	0.7	0	0.5	0	0	0.2	0	0	0
TB391	south	par	par	1798		12	2004	spring	below		5044	m			0	0	0	0	0	0	0	0	0	0	0	0
TB392	south	par	par	1798		12	2004	spring	below		3916	f			0	0	0	0	0	0	0	0	0	0	0	0
TB393	south	sr	sr	1918		12	2004	spring	below		5078	m			0.1	0.2	0	1	0.2	1	0.1	0.2	0	0.1	0.6	0
TB394	south	sr	sr	1918		12	2004	spring	below		4013	f			0.1	0	0.1	0.5	0	0.2	0	0	0.1	0.1	0.1	0
TB395	south	sr	sr	1918		12	2004	spring	below		4066	f			0.1	0	0.1	0.8	0	0.6	0.1	0.3	0	0	0.5	0
TB396	south	sr	sr	1918		12	2004	spring	below		5082	m			0.1	0.1	0.4	0.7	0	1.4	0	0.7	0.1	0	0.5	0
TB397	south	sr	sr	1918		12	2004	spring	below		3486	f			0	0	0.6	0.9	0	1.5	0.1	0.4	0	0.4	0.1	0
TB398	south	sr	sr	1918		12	2004	spring	below		4007	f			0	0	0	1	0.4	0	0	0	0	0	0	0
TB399	south	sr	sr	1918		12	2004	spring	below		4001	m			0	0.4	0	1	0	0.8	0.4	0	0	0	0	0
TB400	south	bc		1867		12	2005	spring	below		4174	m			0	0	0	0.3	0.1	0.4	0	0	0	0	0	0
TB401	south	bc		1867		12	2005	spring	below		5170	f			0.2	0	0.1	0.5	0	0.4	0	0	0	0	0	0
TB402	south	bc		1867		12	2005	spring	below		4225	f			0	0	0.3	0.2	0	0.6	0.1	0	0	0	0	0
TB403	south	bc		1867		12	2005	spring	below		4175	m			0	0	0	0.5	0	0.3	0	0	0	0	0.2	0
TB404	south	cp	cp	1776		12	2005	spring	below		2077	f			0.3	0	0.1	1	0	0.9	0	0.5	0	0.3	0.4	0
TB405	south	cp	cp	1776		12	2005	spring	below		4050	m			0	0	0.2	0.1	0	0.4	0	0	0	0.3	0	0
TB406	south	cp	cp	1776		12	2005	spring	below		4026	m			0	0	0	1	0	0	0	0	0	0.1	0	0
TB407	south	cp	cp	1776		12	2005	spring	below		4099	f			0.1	0.1	0.5	0.8	0	1.3	0	0.5	0	0.2	1	0
TB408	south	kos	kn	2055		12	2005	spring	below		5991	m			0.1	0.2	0	0.6	0	0.9	0	0	0	0.9	0.7	0
TB409	south	kos	kp	2055		12	2005	spring	below		5159	m			0	0	0	0	0.5	0	0	0	0	0	0.9	0
TB410	south	kos	ks	2055		12	2005	spring	below		5864	f			0	0	0	0.7	0	0.3	0	0	0	0.2	0	0
TB411	south	kos	kp	2055		12	2005	spring	below		5105	f			0.5	0	0.4	0.6	0	1.9	0	0	0	0	0	0
TB412	south	kos	ks	2055		12	2005	spring	below		5898	f			0.1	0.3	0.4	0.5	0	1.3	0	0	0	0	0	0
TB413	south	kos	ks	2055		12	2005	spring	below		5008	f			0	0.2	0.1	0.8	0.1	1.2	0.6	0	0.6	0	0	0
TB414	south	kos	kn	2055		12	2005	spring	below		5732	m			0	0.2	1	0.1	0	1.5	0	0	0	0	0	0
TB415	south	kos	ks	2055		12	2005	spring	below		5443	f			0.1	0	0.2	0.3	0	0.7	0	0.4	0	0	0.5	0
TB416	south	kos	kp	2055		12	2005	spring	below		5151	f			0	0.1	0	1	0	0.2	0	0	0	0	0	0
TB417	south	kos	kp	2055		12	2005	spring	below		5114	m			0	0	0.1	0	0	0.1	0	0	0	0.1	0.3	0
TB418	south	kos	kp	2055		12	2005	spring	below		5105	f			0	0	0.3	0.8	0	0.6	0.2	0	0	0	0.1	0
TB419	south	kos	kp	2055		12	2005	spring	below		4173	f			0.3	0.2	1	0.1	0	1.4	0	0	0	0.3	0	0
TB420	south	kos	kn	2055		12	2005	spring	below		5012	f			0	0	0.4	0.4	0	0.4	0	0	0	0	0	0
TB421	south	kos	kp	2055		12	2005	spring	below		5162	m			0.2	0	0.7	1	0	1.3	0	0	0	0.1	0	0
TB422	south	kos	kp	2055		12	2005	spring	below		3415	f			0.5	0	0.1	0.1	0	1	0	0.2	0	0	0	0
TB423	south	kos	kn	2055		12	2005	spring	below		5013	f			0.1	0.3	0.1	0	0	0.5	0	0	0	0	0	0
TB424	south	kos	kp	2055		12	2005	spring	below		5157	f			0	0	0.6	1	0.1	0.9	0	0	0	0	0	0
TB425	south	kos	ks	2055		12	2005	spring	below		5752	m			0	0	0.4	0	0.1	0.7	0	0	0	0.1	0	0
TB426	south	kos	kp	2055		12	2005	spring	below		5004	m			0	0	0.3	1	0.6	0.3	0	0	0	0	0	0
TB427	south	kos	kp	2055		12	2005	spring	below		5103	f			0.6	0	0	0.7	0.3	0.7	0	0	0	0	0	0
TB428	south	kos	kn	2055		12	2005	spring	below		5732	m			0	0	0.3	0.3	0	0.3	0	0	0	0	0	0
TB429	south	kos	kp	2055		12	2005	spring	below		5156	f			0	0	0	0	0	0.1	0	0	0	0	0	0
TB430	south	kos	kp	2055		12	2005	spring	below		5110	f			0	0	0	0	0	0.1	0	0	0	0.3	0	0
TB431	south	kos	kp	2055		12	2005	spring	below		3499	m			0	0.3	0.1	0.7	0	0.5	0	0	0	0	0	0
TB432	south	kos	kp	2055		12	2005	spring	below		4116	m			0	0.1	0.5	0.8	0	0.7	0	0	0	0	0	0
TB433	south	kos	kp	2055		12	2005	spring	below		5117	m			0	0	0	0	0	0	0	0	0	0	0	0
TB434	south	kos	kp	2055		12	2005	spring	below		4172	m			0	0.2	0.2	0.9	0	0.4	0	0	0	0	0	0
TB435	south	kos	kp	2055		12	2005	spring	below		4167	m			0	0	0.2	0.4	0	0.3	0	0	0	0	0	0
TB436	south	kos	kp	2055		12	2005	spring	below		5005	f			0	0.4	0	0	0.1	0.8	0	0	0	0	0.2	0
TB437	south	kos	kp	2055		12	2005	spring	below		5101	f			0.3	0	0	0	0	0.3	0	0	0	0.1	0	0
TB438	south	par	par	1798		12	2005	spring	below		4211	f			0	0	0.1	0.7	0	0.3	0	0	0.3	0.8	0.2	0.1
TB439	south	par	par	1798		12	2005	spring	below		5017	m			0	0	0	0.3	0	0.7	0	0.7	0	0.2	0	0
TB440	south	par	par	1798		12	2005	spring	below		5055	m			0	0	0	0	0	0.5	0	0.4	0	0	0	0
TB441	south	par	par	1798		12	2005	spring	below		4079	m			0	0	0.4	1	0	0.5	0	0	0	0	0	0
TB442	south	par	par	1798		12	2005	spring	below		5169	f			0	0	0	0.7	0	0	0	0	0	0	0.2	0
TB443	south	par	par	1798		12	2005	spring	below		4076	f			0.5	0.1	0	0.3	0	1.1	0	0	0.1	0.5	0.2	0
TB444	south	sr	sr	1918		12	2005	spring	below		4087	f			0.1	0	0.1	0	0.1	0.7	0.3	0.2	0	0	0.1	0
TB445	south	sr	sr	1918		12	2005	spring	below		5072	f			0.6	0.1	0.2	1	0	1.6	0.6	0	0	0.1	0	0.2
TB446	south	sr	sr	1918		12	2005	spring	below		5038	f			0	0	0	0	0.6	0.8	0	0.7	0	1	0	0.1
TB447	south	sr	sr	1918		12	2005	spring	below		5041	f			0.1	0	0	0.8	0.6	0.4	0.1	0.2	0	0.5	0	0
TB448	south	sr	sr	1918		12	2005	spring	below		4113	m			0.7	0	0.1	0.3	0	0.9	0	0	0.4	0.1	0	0
TB449	south	sr	sr	1918		12	2005	spring	below		5118	f			0.6	0	0.1	0.1	0	1	0	0.1	0	0.3	0	0
TB450	south	sr	sr	1918		12	2005	spring	below		5078	m			0.1	0	0.7	0.7	0	0.9	0	0	0	0.3	0	0
TB451	south	sr	sr	1918		12	2005	spring	below		5003	m			0.3	0.1	0.8	0.3	0	1	0	0	0	0.4	0.1	0
TB452	south	sr	sr	1918		12	2005	spring	below		4087	m			0	0	0.4	0.6	0	0.4	0	0	0	0.1	0	0
TB453	south	bc		1867		12	2006	spring	below		5144	f			0	0.8	0	1	0	1.1	0	0	0	0	0	0
TB454	south	bc		1867		12	2006	spring	below		5187	f			0	0	0	1	0.7	0.6	0	0	0.1	0	0.1	0
TB455	south	bc		1867		12	2006	spring	below		5148	m			0	0	0	1	0	0	0	0	0.1	0	0	0
TB456	south	bc		1867		12	2006	spring	below		4127	f			0.3	0.9	0.1	0.3	0	1.3	0	0	0	0	0	0
TB457	south	bc		1867		12	2006	spring	below		5170	f			0.3	0.1	0.2	1	0	1.1	0	0.1	0	0	0	0
TB458	south	bc		1867		12	2006	spring	below		4117	f			0	0.4	0.2	1	0	0.9	0	0	0	0.2	0	0
TB459	south	bc		1867		12	2006	spring	below		5191	m			0	0	0	1	0	0.1	0	0	0	0	0	0
TB460	south	bc		1867		12	2006	spring	below		5180	m			0	0	0.1	1	0	0.2	0.1	0	0.4	0	0	0
TB461	south	bc		1867		12	2006	spring	below		4094	m			0	0	0	0	0	0	0	0	0	0	0	0
TB462	south	cp	cp	1776		12	2006	spring	below		two torn ears	m			0.2	0	0	1	0	1.2	0	0	0	0.3	1	0
TB463	south	cp	cp	1776		12	2006	spring	below		5111	f			0	0.1	0	0.2	0	0.6	0	0	0	1	0	0
TB464	south	cp	cp	1776		12	2006	spring	below		3370	f			0	0	0	0	0	0.3	0	0	0.3	0	0	0
TB465	south	cp	cp	1776		12	2006	spring	below		3370	f			0	0	0	0	0	0	0	0	0.2	0	0	0
TB466	south	cp	cp	1776		12	2006	spring	below		5016	f			0	0.6	0.8	0.7	0	1.9	0.1	0	0	0	0	0
TB467	south	cp	cp	1776		12	2006	spring	below		5015	f			0	0	0	0.9	0	0.2	0	0	0	1	0.1	0
TB468	south	cp	cp	1776		12	2006	spring	below		5043	f			0	0	0	0	0	0.1	0	0	0	0	0	0
TB469	south	cp	cp	1776		12	2006	spring	below		5158	m			0	0	0	0	0	0	0	0	0	0	0	0
TB470	south	cp	cp	1776		12	2006	spring	below		5016	f			0.3	0.4	0.3	0.9	0	1.2	0.5	0	0	0.4	0	0
TB471	south	cp	cp	1776		12	2006	spring	below		5064	f			0	0	0.1	0	0	1	0.3	0	0	1	0	0
TB472	south	cp	cp	1776		12	2006	spring	below		4099	f			0	0	0	0.6	0	0.6	0.1	0	0	1	0	0
TB473	south	kos	kn	2055		12	2006	spring	below		5130	f			0	0	0.5	0.5	0	1.1	0.2	0	0	0.6	0.3	0
TB474	south	kos	kp	2055		12	2006	spring	below		4261	m			0	0	0.2	0	0	0.3	0	0	0	0.1	0	0
TB475	south	kos	kn	2055		12	2006	spring	below		4283	f			0	0	0.1	0	0	0.3	0	0	0	0	0.1	0
TB476	south	kos	ks	2055		12	2006	spring	below		5888	f			0	0	0	0.9	0	0	0	0	0	0	0	0
TB477	south	kos	ks	2055		12	2006	spring	below		5154	f			0	0	0	0.9	0	0	0	0	0	0.1	0	0
TB478	south	kos	kp	2055		12	2006	spring	below		5984	f			0	0	0.1	0.1	0	0.2	0	0	0	0	0	0
TB479	south	kos	kp	2055		12	2006	spring	below		4278	f			0.1	0	0.1	0.4	0.3	0.2	0	0	0	0	0.3	0
TB480	south	kos	kp	2055		12	2006	spring	below		5110	f			0	0	0	0.4	0	0.2	0	0	0	0	0	0
TB481	south	kos	kp	2055		12	2006	spring	below		4224	m			0.3	0	0.1	0.4	0.1	0.8	0	0	0	0	0	0
TB482	south	kos	kn	2055		12	2006	spring	below		4305	f			0	0	0.1	1	0	0.1	0	0	0	0	0	0
TB483	south	kos	ks	2055		12	2006	spring	below		4197	f			0.9	0.5	0	0.1	0	1	0	1	0	0.2	0	0
TB484	south	kos	kp	2055		12	2006	spring	below		4170	f			0.1	0	0.7	0.9	0	1	0	0	0	0.1	0.1	0
TB485	south	kos	kn	2055		12	2006	spring	below		4318	m			0.4	0	0.4	0.2	0	0.8	0	0	0.4	0.2	0	0
TB486	south	kos	kp	2055		12	2006	spring	below		5105	f			0	0	0	1	0.2	0	0	0	0	0	0	0
TB487	south	kos	ks	2055		12	2006	spring	below		5791	f			0	0	0	0.9	0	0.1	0	0	0	0	0.8	0
TB488	south	kos	ks	2055		12	2006	spring	below		5121	f			0.1	0.1	0.6	1	0	1.3	0	0.6	0	0	0	0
TB489	south	kos	kp	2055		12	2006	spring	below		5013	f			0	0.2	0.2	1	0	0.6	0.1	0	0	0	0	0
TB490	south	kos	kp	2055		12	2006	spring	below		4279	m			0	0	0	1	0.4	0	0	0	0	0	0	0
TB491	south	kos	ks	2055		12	2006	spring	below		5898	f			0	0	0	1	0	0.2	0	0.2	0	0.1	0	0
TB492	south	kos	kp	2055		12	2006	spring	below		5962	m			0.6	0	0.7	0.3	0	1.2	0	0	0	0	0	0
TB493	south	kos	kp	2055		12	2006	spring	below		4121	m			0	0	0.4	0.9	0.2	0.5	0	0	0	0	0	0
TB494	south	kos	ks	2055		12	2006	spring	below		3415	f			0	0	0.1	0.5	0	0.1	0	0	0	0	0	0
TB495	south	kos	kp	2055		12	2006	spring	below		3499	m			0.1	0	0.5	0	0	0.6	0	0	0	0	0	0
TB496	south	kos	kp	2055		12	2006	spring	below		5157	f			0	0	0	0.3	0	0	0	0	0	0.7	0	0
TB497	south	kos	kp	2055		12	2006	spring	below		3499	m			0	0	0.1	0.1	0	0.1	0	0	0	0	0	0
TB498	south	kos	kn	2055		12	2006	spring	below		4208	m			0	0	0	0.7	0	0.1	0	0	0	0	0	0
TB499	south	kos	kp	2055		12	2006	spring	below		4280	m			0	0.1	0	0.9	0	0.1	0	0	0	0	0	0
TB500	south	kos	ks	2055		12	2006	spring	below		5002	f			0.6	0	0.4	0.1	0.1	1.3	0	0	0	0	0	0
TB501	south	kos	ks	2055		12	2006	spring	below		4195	f			0	0.2	0.2	1	0.5	0.7	0	0	0	0	0.1	0
TB502	south	kos	ks	2055		12	2006	spring	below		4250	m			0.1	0	0	0.5	0	0.1	0	0	0	0	0	0
TB503	south	kos	kp	2055		12	2006	spring	below		5039	m			0.1	0	0	0.7	0.4	0.3	0	0.2	0	0	0	0.2
TB504	south	kos	kp	2055		12	2006	spring	below		5033	m			0	0	0	0.6	0	0.2	0	0	0	0	0	0
TB505	south	kos	kp	2055		12	2006	spring	below		5752	m			0	0	0	1	0	0	0	0	0	0	0	0
TB506	south	kos	kp	2055		12	2006	spring	below		4208	m			0	0	0	1	0.1	0.5	0	0	0	0	0	0
TB507	south	kos	kp	2055		12	2006	spring	below		4315	f			0.1	0.1	0	0.4	0	1.1	0	0.5	0	0	0	0
TB508	south	kos	kp	2055		12	2006	spring	below		4167	m			0.1	0.1	0.2	0.7	0	0.5	0	0	0	0	0.3	0
TB509	south	kos	kp	2055		12	2006	spring	below		4239	m			0	0	0	1	0.1	0.8	0.1	0.7	0	0	0.7	0
TB510	south	kos	kp	2055		12	2006	spring	below		5759	m			0	0	0	1	0	0.6	0	0	0	0.5	0.1	0
TB511	south	kos	kp	2055		12	2006	spring	below		3415	f			0	0	0.6	1	0	0.6	0	0	0	0	0	0
TB512	south	kos	kp	2055		12	2006	spring	below		5014	m			0	0	0	0.7	0	0.2	0.2	0	0	0	0.2	0
TB513	south	kos	kp	2055		12	2006	spring	below		4312	f			0	0	0.4	0.6	0	0.7	0.3	0	0	0	0	0
TB514	south	par	par	1798		12	2006	spring	below		5057	m			0	0.3	0.4	1	0	1.1	0	0	0	0	0.9	0
TB515	south	par	par	1798		12	2006	spring	below		5147	m			0.5	0.7	0.1	0.1	0	1.4	0	0	0	0	0.8	0
TB516	south	par	par	1798		12	2006	spring	below		4210	f			0	0.4	0	0	0	0.7	0.2	0	0	0	0	0
TB517	south	par	par	1798		12	2006	spring	below		5010	m			0	0.4	0.2	0.9	0	0.7	0	0	0	0	1	0
TB518	south	par	par	1798		12	2006	spring	below		4286	f			0.9	0.3	0.2	1	0	1.1	0.1	0.3	0	0	0.1	0
TB519	south	par	par	1798		12	2006	spring	below		4168	m			0	0.8	0.3	0.7	0	1.5	0	0	0	0	0	0
TB520	south	par	par	1798		12	2006	spring	below		5184	f			0.4	0.1	0.8	0	0	1.2	0	0	0	0	1	0
TB521	south	par	par	1798		12	2006	spring	below		5199	m			0	0.1	0	1	0	0.2	0	0	0	0	1	0
TB522	south	par	par	1798		12	2006	spring	below		5126	f			0	0.4	1	0	0	1.1	1	0.7	0	0	0	0.3
TB523	south	sr	sr	1918		12	2006	spring	below		5028	m			0.7	0	0.1	0	0	1.3	0	0.7	0	0.4	0	0
TB524	south	sr	sr	1918		12	2006	spring	below		4281	f			0.1	1	0.2	0.1	0	1.3	0	0	0.3	0.6	0	0
TB525	south	sr	sr	1918		12	2006	spring	below		4163	m			0	0.8	0.2	0.2	0	1	0	0	0	0.4	0.8	0.1
TB526	south	sr	sr	1918		12	2006	spring	below		5058	f			0	0.1	0.3	0.9	0.2	1.6	0.2	0	0.1	1	0	0
TB527	south	sr	sr	1918		12	2006	spring	below		4087	f			0	0.2	0.5	0.4	0	1.5	0	0	0	1	0.3	0
TB528	south	sr	sr	1918		12	2006	spring	below		5106	m			0	1	0.4	0	0	1.5	0.3	0	0	0	0	0
TB529	south	sr	sr	1918		12	2006	spring	below		4200	f			0.3	0.5	0.9	0	0	1.2	0	0	0	0.5	0	0
TB530	south	sr	sr	1918		12	2006	spring	below		5046	m			0.1	0.4	0	0	0	1.2	0.4	0	0	0.1	0.2	0
TB531	south	bc	bcp	1867		11	2007	spring	below		5191	f			0	0.3	0	0.8	0	0.3	0	0	0	0	0	0
TB532	south	bc	bcp	1867		11	2007	spring	below		4110	m			0	0	0.2	0.4	0	0.4	0	0.1	0	0	0	0
TB533	south	bc	bcp	1867		11	2007	spring	below		5001	m			0	0	0	0.9	0	0.1	0.1	0	0	0	0	0
TB534	south	bc	bcp	1867		11	2007	spring	below		4316	m			0	0	0.5	0.7	0	0.5	0	0	0	0	0	0
TB535	south	bc	bcp	1867		11	2007	spring	below		5132	m			0	0.1	0	0.5	0	0.1	0	0	0	0.1	0	0
TB536	south	bc	bcp	1867		11	2007	spring	below		4380	m			0	0	0.4	0.7	0	0.4	0	0	0	0	0	0
TB537	south	cp	cp	1776		11	2007	spring	below		5186	m			0	0	0	1	0.1	0	0	0	0	0	0	0
TB538	south	cp	cp	1776		11	2007	spring	below		4125	f			0	0	0.8	0	0	0.8	0	0	0	0	0	0
TB539	south	cp	cp	1776		11	2007	spring	below		4125	f			0	0	0.5	0.9	0	0.5	0	0	0	0.3	0	0
TB540	south	cp	cp	1776		3	2007	autumn	below		5072	f			0.3	0	0.7	0	0	1.8	0	0	0	0.6	0.2	0
TB541	south	cp	cp	1776		3	2007	autumn	below		5007	f			0	0	0	0	0.8	0.6	0	0	0	0.8	0	0
TB542	south	cp	cp	1776		3	2007	autumn	below		4255	f			0	0	0	0.1	0	0.6	0	0	0	0.3	0	0
TB543	south	cp	cp	1776		3	2007	autumn	below		4269	f			0.2	0.1	0.6	0	0	2	0.4	0	0	0.2	0.1	0
TB544	south	cp	cp	1776		3	2007	autumn	below		4251	m			0.9	0.2	0	0	0	1.5	0	0	0	0	0	0
TB545	south	cp	cp	1776		3	2007	autumn	below		5043	f			0.1	0	0.2	0	0	0.7	0	0	0	0.9	0	0
TB546	south	cp	cp	1776		3	2007	autumn	below		5190	m			0.3	0	1	0	0	2	0	0	0	0.3	0.1	0
TB547	south	cp	cp	1776		3	2007	autumn	below		4230	m			0	0	0.3	0	0	0.7	0.3	0	0	0	0.1	0
TB548	south	cp	cp	1776		3	2007	autumn	below		4268	m			0.2	0.5	0.3	0	0	1.5	0	0	0	0	0	0
TB549	south	cp	cp	1776		3	2007	autumn	below		4099	f			0	0	0	0	0	0.4	0	0	0	0.4	0	0
TB550	south	kos	kn	2055		3	2007	autumn	below		N18	f			0	0	0	0.5	0	0	0	0	0	0	0	0
TB551	south	kos	kn	2055		3	2007	autumn	below		trap8	f			0	0	0	0.4	0	0.1	0	0	0	0	0	0
TB552	south	kos	ks	2055		3	2007	autumn	below		trap9	f			0	0	0.4	0.9	0	0.4	0	0	0	0	0	0
TB553	south	kos	ks	2055		3	2007	autumn	below		trap32	m			0	0	0.6	0	0	0.6	0	0	0	0.3	0	0
TB554	south	kos	ks	2055		3	2007	autumn	below		4254	m			0	0	0.6	0.5	0	0.6	0	0	0	0	0	0
TB555	south	kos	ks	2055		3	2007	autumn	below		trap39	m			0	0	0.2	0	0	0.5	0	0	0	0.3	0	0
TB556	south	cp	cp	1776		11	2008	spring	below		388	f			0	0	0	1	0	0.3	0	0	0	0	0	0
TB557	south	cp	cp	1776		11	2008	spring	below		5064	f			0	0	0	1	0	0	0	0	0	0	0	0
TB558	south	cp	cp	1776		2	2008	spring	below		5034	f			0	0	0	0	0	0.1	0.1	0	1	0	0	0.1
TB559	south	cp	cp	1776		2	2008	spring	below		5064	f			0	0	0	0	0	0	0	0	1	0	0	0
TB560	south	cp	cp	1776		2	2008	spring	below		4125	f			0	0.1	0	0	0	0.1	0	0	1	0	0	0.1
TB561	south	cp	cp	1776		11	2008	spring	below		5034	f			0	0	0	0.7	0	0.6	0	0	0	1	0	0
TB562	south	cp	cp	1776		11	2008	spring	below		5007	f			0	0	0.2	0.9	0	0.4	0.2	0	0	0.1	0.4	0
TB563	south	cp	cp	1776		11	2008	spring	below		4397	m			0	0	0	1	0	0.1	0	0	0	0.1	0	0
TB564	south	cp	cp	1776		11	2008	spring	below		5064	f			0	0	0	1	0	0.8	0	0.7	0.4	0	0	0.1
TB565	south	cp	cp	1776		1	2009	spring	below		333	f			0	0	0	0	0	0.4	0	0	0	1	0	0
TB566	south	kos	ks	2055		11	2009	spring	below		4335	f			0.3	0.3	0.2	0.6	0	0.8	0	0	0	0	0	0
TB567	south	kos	kn	2055		11	2009	spring	below		4360	f			0	0	0	0.7	0.3	0.1	0	0	0	0	0	0
TB568	south	kos	kp	2055		11	2009	spring	below		4909	f			0	0	0.3	0.1	0	0.5	0	0	0	0	0	0
TB569	south	kos	kn	2055		11	2009	spring	below		4392	f			0.1	0	0.6	0.1	0	0.7	0	0	0	0.1	0.2	0
TB570	south	kos	ks	2055		11	2009	spring	below		4386	f			0.1	0	0.2	1	0.3	0.3	0	0	0	0	0	0
TB571	south	par	par	1798		11	2009	spring	below		4357	f			0	0	0	0.6	0	0	0	0	0	0	0	0
TB572	south	par	par	1798		11	2009	spring	below		4287	f			0	0	0	0.1	0	0	0	0	0	0	0	0
TB573	south	par	par	1798		11	2009	spring	below		4234	f			0.6	0	0	1	0	1.1	0	0	0	0.6	0	0
TB574	south	par	par	1798		11	2009	spring	below		4336	f			0	0	0	0.7	0	0.3	0	0	0	0	0	0
TB575	south	par	par	1798		11	2009	spring	below		348	f			0.2	0.2	0.3	0.8	0	0.9	0	0	0	0	0	0
TB576	south	par	par	1798		11	2009	spring	below		4357	f			0	0	0	0.6	0	0	0	0	0	0	0	0
TB577	south	par	par	1798		11	2009	spring	below		4321	m			0	0	0	0.6	0	0.4	0	0.1	0	0.1	0	0
TB578	south	par	par	1798		11	2009	spring	below		4321	m			0	0	0.2	0.7	0	0.3	0	0.1	0	0	0.1	0.1
TB579	south	towns	towns	2028		1	2009	spring	below		4324	m			0	0	0.1	1	0	0.3	0	0.1	0	0	0	0
TB580	south	towns	towns	2028		1	2009	spring	below		4319	f			0.6	0	0	0.8	0	0.7	0	0	0	0	0	0
TB581	south	towns	towns	2028		1	2009	spring	below		PK18	f			0	0	0.2	0.8	0	0.4	0	0.1	0	0.1	0	0.1
TB582	south	towns	towns	2028		1	2009	spring	below		L4	f			0	0.1	0.3	1	0	0.4	0	0	0	0	0	0
TB583	south	towns	towns	2028		1	2009	spring	below		4019	m			0	0	0.2	1	0	0.4	0	0.1	0	0.1	0	0
TB584	south	towns	towns	2028		1	2009	spring	below		L5	m			0	0	0	1	0	0	0	0	0	0	0	0
TB585	south	towns	towns	2028		1	2009	spring	below		4324	m			0	0.1	0	0	0	0.5	0	0	0	0.6	0	0
TB586	south	towns	towns	2028		1	2009	spring	below		PK21	f			0	0	0.2	0.3	0	0.2	0	0	0	0.3	0	0
TB1	south	bc		1798		12	1994	spring	below		1249	f			0	0	0	0	0	0	0	0	0	0	0.1	0
TB10	south	cp	cp	1776		12	1994	spring	below		1284	f			0	0.1	0	0.9	0.2	0.7	0	0.5	0	0.1	0.1	0
TB100	south	bc		1867		3	1997	autumn	below		1539	f			0	0	0.4	0	0	0.6	0	0.1	0.9	0	0.2	0
TB101	south	bc		1867		3	1997	autumn	below		1778	m			0.3	0.5	0	0	0	1.3	0	0	0.8	0	0	0
TB102	south	bc		1867		12	1997	spring	below		1484	f			0	0	0.1	1	0	0.5	0	0	0	0	0.7	0
TB103	south	bc		1867		12	1997	spring	below		1868	f			0	0	0	1	0.1	0	0	0	0.1	0	0	0
TB104	south	bc		1867		12	1997	spring	below		1532	f			0	0	0	0.1	0	0	0	0	0	0	0	0
TB105	south	bc		1867		12	1997	spring	below		1332	f			0.6	0.1	0.1	1	0.3	1.2	0.2	0	0.1	0	0	0.1
TB106	south	bc		1867		12	1997	spring	below		1232	f			0	0	0	1	0	0.1	0	0	0	0	0	0
TB107	south	bc		1867		12	1997	spring	below		1542	f			0.2	0	0.2	0.9	0.4	0.4	0	0	0	0.2	0.6	0
TB108	south	bc		1867		12	1997	spring	below		1743	f			0.5	0	0	0.7	0	0.6	0	0	0	0	0.4	0
TB109	south	bc		1867		12	1997	spring	below		1380	f			0	0	0.1	1	0.4	0.2	0	0	0.1	0	0.5	0
TB11	south	cp	cp	1776		12	1994	spring	below		1242	m			0	0	0	1	0	0.1	0	0	0	0	0	0
TB110	south	bc		1867		12	1997	spring	below		1620	m			0.1	0	0	0.9	0.1	0.4	0	0	0	0	0	0
TB111	south	bc		1867		3	1997	autumn	below		1232	f			0	0	0	0	0	0	0	0	0	0	0	0
TB112	south	cp	cp	1776		12	1997	spring	below		1411	m			0.7	0	0.1	0.2	0	1	0	0	0	0	0.1	0
TB113	south	cp	cp	1776		12	1997	spring	below		1563	f			0.2	0	0	0	0	0.7	0.1	0	0	0.4	0.9	0
TB114	south	cp	cp	1776		12	1997	spring	below		2012	f			0	0	0	1	0	0.1	0	0	0.1	0.2	0.1	0
TB115	south	cp	cp	1776		12	1997	spring	below		2075	f			0	0	0	1	0	1	0	0	0	0.3	0.6	0
TB116	south	cp	cp	1776		12	1997	spring	below		1390	f			0.1	0.2	0	0.6	0	1.4	0.6	0	0	0.1	0.4	0
TB117	south	cp	cp	1776		12	1997	spring	below		2007	m			0	0	0	0.9	0.1	0.6	0	0	0	0.1	0	0
TB118	south	cp	cp	1776		12	1997	spring	below		1529	f			0	0	0.6	0.9	0	1.2	0.4	0.2	0	0.1	0.3	0
TB119	south	cp	cp	1776		12	1997	spring	below		1759	m			0.2	0	0.2	1	0	1	0	0	0	0.1	0	0
TB12	south	cp	cp	1776		12	1994	spring	below		2667	f			0	0	0.1	0.7	0	0.7	0	0	0	0.2	0	0
TB120	south	cp	cp	1776		12	1997	spring	below		1511	f			0	0	0	1	0	1.1	0.1	0.3	0.4	0.1	0.7	0
TB121	south	cp	cp	1776		3	1997	autumn	below		1511	f			0	0.7	0	0	0	0.8	0	0	0	0	1	0
TB122	south	cp	cp	1776		3	1997	autumn	below		8096	f			0	0	0	0	0	0	0	0	0	0.1	0.9	0.2
TB123	south	cp	cp	1776		3	1997	autumn	below		8098	m			0	0	0	0	0	0.2	0	0	0.1	0	0	1
TB124	south	cp	cp	1776		3	1997	autumn	below		2032	m			0	0.5	0	0	0	1.1	0	0	0	0	0	0
TB125	south	par	par	1798		12	1997	spring	below		2006	f			0	0	0.2	1	0	1.1	0	0.8	0	0.3	0	0
TB126	south	par	par	1798		12	1997	spring	below		2050	f			0.1	0.1	0.9	0	0.1	1.1	0	0	0.2	0	0.1	0
TB127	south	par	par	1798		12	1997	spring	below		1750	f			0	0	0	0.4	0	0.3	0	0	0	0	0.2	0.7
TB128	south	par	par	1798		12	1997	spring	below		885	f			0	0.4	0.1	1	0	0.5	0	0	0	0	0	0
TB129	south	par	par	1798		12	1997	spring	below		1703	f			0.1	0	0.5	0.4	0	0.7	0.1	0	0	0.1	0.4	0
TB13	south	cp	cp	1776		12	1994	spring	below		2644	f			0	0	0.5	0.8	0	1	0	0.4	0	0	0.8	0
TB130	south	par	par	1798		12	1997	spring	below		1600	f			0.2	0.4	0.2	0.9	0	1.2	0	0.9	0	0	0.4	0.3
TB131	south	par	par	1798		12	1997	spring	below		1841	m			0.1	0	0	0.6	0	1.1	0.3	0	0.1	0	0.6	0
TB132	south	par	par	1798		12	1997	spring	below		1844	m			0	0	0	1	0	0.1	0	0	0	0	0.1	0
TB133	south	par	par	1798		3	1997	autumn	below		1605	m			0	0	0	0	0	0.2	0	0	0	0	0.1	0.8
TB134	south	par	par	1798		3	1997	autumn	below		1623	m			0	0	0.6	0	0	0.6	0	0	0	0	0.4	0
TB135	south	par	par	1798		3	1997	autumn	below		1703	f			0	0.1	0.5	0.1	0	0.7	0	0	0	0	0	0
TB136	south	par	par	1798		3	1997	autumn	below		1534	f			0.2	0.4	0.2	0	0	0.9	0	0	1	0	0	0.1
TB137	south	sr	sr	1918		3	1997	autumn	below		1761	f			0.1	0	0	1	0	0.1	0	0	0.3	0	0.4	0
TB138	south	sr	sr	1918		3	1997	autumn	below		1150	f			0	0	0	0.2	0	0	0	0	0.5	0	0.2	0.8
TB139	south	sr	sr	1918		3	1997	autumn	below		1555	f			0	0	0	0	0	0	0	0	0.7	0.1	0.4	0.6
TB14	south	cp	cp	1776		12	1994	spring	below		1375	m			0	0	0	1	0	0.1	0	0	0	0.3	0	0
TB140	south	sr	sr	1918		3	1997	autumn	below		1633	f			0	0	0	0	0	0.2	0	0	1	0	0	0.2
TB141	south	sr	sr	1918		3	1997	autumn	below		1630	m			0	0	0.2	0	0.3	0.2	0	0	0.7	0	0.6	0.4
TB142	south	sr	sr	1918		3	1997	autumn	below		1751	f			0.2	0.1	0	0	0.3	0.5	0	0.2	0.7	0	0.4	0
TB143	south	sr	sr	1918		12	1997	spring	below		1723	m			0.1	0.3	0.4	1	0	1.2	0	0	0	0	0.2	0
TB144	south	sr	sr	1918		12	1997	spring	below		2017	m			0	0	0.1	1	0	0.1	0	0	0	0	0	0
TB145	south	sr	sr	1918		12	1997	spring	below		1890	m			0	0.2	0.3	1	0	1	0	0.5	0	0	0.2	0
TB146	south	sr	sr	1918		12	1997	spring	below		2081	m			0	0	0	1	0	0.1	0	0	0	0	0.4	0
TB147	south	sr	sr	1918		12	1997	spring	below		1150	f			0	0	0.4	0	0	0.6	0.1	0	0	0.6	0	0
TB148	south	sr	sr	1918		12	1997	spring	below		1726	f			0	0	0	0.6	0.1	0.4	0	0.4	0.1	0	0	0
TB149	south	sr	sr	1918		12	1997	spring	below		1736	m			0.1	0.3	0.2	0.6	0	1.1	0	0.3	0	0.2	0	0
TB15	south	cp	cp	1776		12	1994	spring	below		7702	m			0	0	0	0.6	0.5	0.9	0.2	0	0.1	0.2	0.2	0.5
TB150	south	sr	sr	1918		12	1997	spring	below		1835	m			0.6	0.1	0.1	1	0	1.4	0	0.6	0	0	0	0
TB151	south	sr	sr	1918		12	1997	spring	below		2621	f			0.2	0.1	0	1	0	1	0	0.6	0	0.2	0.1	0
TB152	south	sr	sr	1918		3	1997	autumn	below		1726	f			0	0.2	0.3	0	0	0.5	0	0	0.8	0.1	0.7	0.3
TB16	south	par	par	1798		12	1994	spring	below		1422	f			0.1	0	0.2	0.5	0	0.4	0	0	0	0	0.1	0
TB17	south	par	par	1798		12	1994	spring	below		1356	f			0	0	0.1	0.2	0	0.3	0	0	0	0	0.2	0
TB18	south	par	par	1798		12	1994	spring	below		1424	m			0	0.6	0	0	0.1	0.8	0	0	0.2	0	0	0
TB19	south	par	par	1798		12	1994	spring	below		1408	m			0	0	0	0	0	0	0	0	0	0	0	0
TB2	south	bc		1798		12	1994	spring	below		1417	m			0	0	0.6	0	0	0.7	0	0	0	0	0	0
TB20	south	par	par	1798		12	1994	spring	below		885	f			0	0	0	0	0	1	0	1	0	0	0.1	0
TB21	south	sr	sr	1918		12	1994	spring	below		1387	m			0.1	0	0.5	0.7	0.1	1	0	0.5	0	0.1	0	0
TB22	south	sr	sr	1918		12	1994	spring	below		1356	f			0.2	0.1	0	0	0	0.3	0	0	0.2	0.1	0	0
TB23	south	bc		1798		12	1995	spring	below		1164	f			0	0	0	0	0	0	0	0	0	0	0	0
TB24	south	bc		1798		12	1995	spring	below		1581	m			0	0	1	0.6	0	1.2	0	0	0	0	0.1	0
TB25	south	bc		1798		12	1995	spring	below		1446	f			0	0	0	0	0	0.6	0	0	0	0.1	0.3	0
TB26	south	bc		1798		12	1995	spring	below		1304	f			0	0	0.1	0.5	0.3	0.2	0	0	0.1	0.1	0.8	0
TB27	south	bc		1798		12	1995	spring	below		1154	m			0	0	0.1	1	0.2	0.1	0	0	0	0	0	0
TB28	south	bc		1798		12	1995	spring	below		1364	f			0.1	0	0.8	0.3	0	0.9	0	0	0	0	0	0
TB29	south	bc		1798		12	1995	spring	below		1235	m			0	0	0	0.8	0	0.5	0	0.5	0	0	0.2	0
TB3	south	bc		1798		12	1994	spring	below		1154	m			0.1	0.3	0	0.5	0	0.4	0	0	0.1	0	0.6	0
TB30	south	bc		1798		12	1995	spring	below		1273	m			0.9	0	0	0	0	0.9	0	0	0	0	0.4	0
TB31	south	cp	cp	1776		12	1995	spring	below		1464	f			0.4	0	0.1	0.4	0	1.4	0.1	0.7	0	0.3	0.2	0
TB32	south	cp	cp	1776		12	1995	spring	below		1345	f			0	0	0	0.9	0	0.7	0.6	0	0	0	0.3	0
TB33	south	cp	cp	1776		12	1995	spring	below		1281	f			0	0.5	0.4	0.2	0	1.1	0.2	0.8	0.1	0.1	0.2	0
TB34	south	cp	cp	1776		12	1995	spring	below		1428	f			0	0.3	0.7	0.9	0	1.4	0	0	0	0	0.3	0
TB35	south	cp	cp	1776		12	1995	spring	below		1406	m			0.1	0	0.4	0.1	0	1	0	0.3	0	0.2	0	0
TB36	south	cp	cp	1776		12	1995	spring	below		7744	m			0	0	0	0.8	0	0	0	0	0	0	0.2	0
TB37	south	cp	cp	1776		12	1995	spring	below		7733	f			0.4	0	0	0.6	0	1	0.4	0.4	0	0	0.2	0
TB38	south	par	par	1798		12	1995	spring	below		1600	f			0.9	0.2	0	0.9	0	1.3	0.1	0.5	0	0	0.3	0
TB39	south	par	par	1798		12	1995	spring	below		1397	m			0	0	0.1	0.6	0	0.3	0	0	0	0.2	0.2	0
TB4	south	bc		1798		12	1994	spring	below		1304	f			0.1	0	0.1	0.3	0	0.3	0	0	0	0	0.1	0.1
TB40	south	par	par	1798		12	1995	spring	below		1442	f			0.1	0	0.2	1	0	1.1	0	0.8	0	0	0.3	0
TB41	south	par	par	1798		12	1995	spring	below		1575	f			0.1	0	1	0	0	1.1	0.1	0.1	0	0.5	0.4	0
TB42	south	par	par	1798		12	1995	spring	below		7717	f			0	0.1	0	1	0.1	1.1	0.2	0.8	0	0	0.1	0
TB43	south	par	par	1798		12	1995	spring	below		1313	m			0.1	0	0	0.5	0.1	0.3	0.1	0	0	0	0	0
TB44	south	sr	sr	1918		12	1995	spring	below		1404	m			0.2	0	0	0.8	0.7	0.4	0	0	0	0	0.7	0
TB45	south	sr	sr	1918		12	1995	spring	below		1476	f			0.2	0.5	0.4	0.8	0	1.1	0	0.2	0	0.1	0	0
TB46	south	sr	sr	1918		12	1995	spring	below		1412	m			0.2	0	0	1	0	0.4	0	0	0	0	0	0
TB47	south	sr	sr	1918		12	1995	spring	below		1208	f			0	0.5	0.3	0.3	0	1.3	0	0.3	0	0.3	0.4	0
TB5	south	bc		1798		12	1994	spring	below		1380	f			0	0	0	0	0	0.5	0	0	0	0	0	0
TB6	south	bc		1798		12	1994	spring	below		1354	f			0	0.3	0.1	0	0.6	0.9	0	0	0	0	1	0
TB7	south	bc		1798		12	1994	spring	below		1392	m			0.2	0	0.2	0	0.3	0.7	0	0.3	0	0	0	0
TB8	south	cp	cp	1776		12	1994	spring	below		1229	f			0	0	0.1	1	0.1	0.3	0.1	0	0	0	0.2	0
TB9	south	cp	cp	1776		12	1994	spring	below		2651	m			0	0	0	0	0	0.2	0	0	0	0.1	0	0
TB96	south	bc		1867		3	1997	autumn	below		1526	f			0	0	0	0	0	0	0	0	1	0	0	0.2
TB97	south	bc		1867		3	1997	autumn	below		1585	f			0	0	0	0	0	0	0	0	1	0	0	0.2
TB98	south	bc		1867		3	1997	autumn	below		two torn ears	f			0	0	0	0	0	0	0	0	1	0	0	0
TB99	south	bc		1867		3	1997	autumn	below		1484	f			0	0	0.1	0	0	0.2	0	0	1	0	0	0

## Sheet: season_comparison
slide	location	site	population	elevation	day	month	year	season	rainfall	trap np	id	Sex	Age	walnut	coleoptera	Plant sp1	araneae	chilopoda	lepidoptera larvae	lepidoptera	d.tas	a.montanus fruit	local.invert	diplopoda	orthoptera	p.ligustrina	p.lawrencei	plant.other	plant sp 4 seed	plat sp 4 fruit	plant sp2	plant sp3	alpine celery	opilions
TA286	north	snow	srh	1488.5	27	3	2012	autumn	above	M11	5140	F	A	Y	0	0	0	0	0	0	0	0	0	0	0	0.3	0	0	0	0	0	0	0	0
TA287	north	snow	srh	1488.5	27	3	2012	autumn	above	M13		F	A	Y	0.1	0	0	0	0	0	0.5	0	0.1	0	0	0.3	0	0	0	0	0	0	0	0
TA288	north	snow	srh	1488.5	27	3	2012	autumn	above	M8		F	A	Y	0	0	0	0	0.1	0	0	0	0	0	0	1	0	0	0	0	0	0	0	0
TA352	north	snow	srr	1488.5	18	4	2012	autumn	above	7		M		N	0	0	0	0	0	0	0	0	0	0	0	0	0	0.4	0.6	0.4	0	0	0	0
TA353	north	snow	srr	1488.5	18	4	2012	autumn	above			M	A	N	0.1	0.1	0	0	0	0	0	0	0	0	0	0	0	0.1	0	0	0	0	0	0.1
TA354	north	snow	srr	1488.5	17	4	2012	autumn	above	5		M	J	N	0	0.3	0	0	0	0	0.1	0	0	0	0.2	0.2	0	0.1	0	0	0	0	0	0
TA355	north	snow	srr	1488.5	17	4	2012	autumn	above	2		M	J	N	0	0	0	0	0	0	0	0	0	0	0	0	0	0.4	0.5	0.3	0	0	0	0
TA356	north	snow	srr	1488.5	18	4	2012	autumn	above			F	A	N	0	0	0	0	0	0	0.4	0	0.1	0	0	0	0.3	0.2	0	0	0	0	0	0
TA357	north	snow	srr	1488.5	18	4	2012	autumn	above		4747	F	A	N	0	0	0	0	0	0	0	0	0	0	0	0	0	0	0	0	0	0	0	0
TA358	north	snow	srh	1488.5	17	4	2012	autumn	above	6		F	A	N	0	0	0	0	0	0	0	0	0	0	0	0	0	0	0	0	0	0	0	0
TA359	north	snow	srh	1488.5	19	4	2012	autumn	above		472	F	J	N	0	0	0	0	0	0	0.1	0	0	0	0	0.9	0	0	0	0	0	0	0	0
TA360	north	snow	srh	1488.5	19	4	2012	autumn	above	A8		F	A	N	0.1	0	0	0	0	0	0.2	0	0	0	0	0.5	0	0.1	0	0	0	0	0	0
TA100	north	hjs	spoil	1225	11	4	2013	autumn	above	HJ19		F	A	Y	0	0	0	0	0	0	0.3	0	0	0	0.1	0	0	0	0	0	0	0	0	0
TA101	north	hjs	l screen	1225	17	4	2013	autumn	above	HJ35		F	J	Y	0	0	0	0	0	0	0	0	0	0	0	0	0	0	0	0	0	0	0	0
TA102	north	hjs	l screen	1225	17	4	2013	autumn	above	HJ35		F	J	Y	0	0	1	0	0	0	0	0	0	0	0	0	0	0	0	0	0	0	0	0
TA103	north	hjs	l screen	1225	13	4	2013	autumn	above	HJ35		F	J	Y	0	0	0	0	0	0	0	0	0	0	0	0	0	0	0	0	0	0	0	0
TA204	north	hjs		1225	12	3	2013	autumn	above	HJ19	D2D71	F			0	0	0	0	0	0	0	0	0	0	0	0	0	0	0	0	0	0	0	0
TA205	north	hjs	T33	1225	12	3	2013	autumn	above	HJ19	DA0CC	F			0	0	0	0	0	0	0.3	0	0	0	0	0	0	0	0	0	0	0	0	0
TA208	north	hjs	T43	1225	11	3	2013	autumn	above	SD4	D210A	F	J		0	0	0	0	0	0	0.3	0	0.2	0	0	0	0	0.1	0.2	0.1	0	0	0	0
TA209	north	hjs	T40	1225	13	3	2013	autumn	above	HJ19	D8E9C	F	J	Y	0	0	0	0	0	0	0	0	0	0	0	0	0	0	0	0	0	0	0	0
TA210	north	hjs	T10	1225	14	3	2013	autumn	above	HJ35	D4EFF	F	J		0	0	0	0	0.7	0	0	0	0	0	0	0	0	0.2	0.1	0.2	0	0	0	0
TA211	north	hjs	T50	1225	11	3	2013	autumn	above	SD4	DAE80	F	J		0.3	0	0.2	0	0	0	0	0	0.3	0	0	0	0	0	0	0	0	0	0	0.2
TA212	north	hjs	T21	1225	11	3	2013	autumn	above	SD4	D2478	F	A		0	0	0	0	0	0	0.2	0	0	0	0	0	0	0.4	0.5	0.4	0	0	0	0
TA213	north	hjs	T48	1225	12	3	2013	autumn	above	HJ19		F	A		0	0	0.1	0	0	0	0.2	0	0.4	0	0.1	0	0	0.1	0	0.1	0	0	0	0
TA214	north	hjs	T27	1225	12	3	2013	autumn	above	HJ35		F	A		0	0	0	0	0	0	0	0	0	0	0	0	0	0	0	0	0	0	0	0
TA215	north	hjs	T18	1225	14	3	2013	autumn	above	HJ35	D235C	F	J		0	0	0	0	0	0	1	0	0	0	0	0	0	0	0	0	0	0	0	0
TA216	north	hjs	T32	1225	14	3	2013	autumn	above	HJ35	DA662	F	A		0	0	0	0	0	0	0.6	0	0	0	0	0	0	0	0	0	0	0	0	0
TA217	north	hjs	T47	1225	11	3	2013	autumn	above	SD4	DD3B2	F	A		0.1	0	0	0	0	0	0.5	0	0	0	0	0	0	0.3	0	0.3	0	0	0	0
TA30	north	snow	srh	1488.5	27	3	2012	autumn	above	M8		F	A	Y	0	0	0	0	0	0	0	0	0	0	0	1	0	0	0	0	0	0	0	0
TA31	north	snow	srh	1488.5	27	3	2012	autumn	above	M4		F	A	Y	0	0	0	0	0	0	0	0	0	0	0	1	0	0	0	0	0	0	0	0
TA32	north	snow	srr below	1488.5	18	4	2012	autumn	above	16		M	J	OIL	0	0	0	0	0	0	0	0	0	0	0	0	0	0	0	0	0	0	0	0
TA33	north	snow	srr below	1488.5	17	4	2012	autumn	above	5		M	J	OIL	0	0	0	0	0	0	0.2	0	0	0	0	0	0	0	0	0	0	0	0	0
TA34	north	snow	srr below	1488.5	17	4	2012	autumn	above	6		F	A	OIL	0	0	0	0	0	0	0	0	0	0	0	0	0	0	0	0	0	0	0	0
TA35	north	snow	srr below	1488.5	18	4	2012	autumn	above	7		M	J	OIL	0	0	0	0	0	0	0	0	0	0	0	0	0	0.6	0.3	0.6	0	0	0	0
TA385	north	hjs	sd4	1225	11	4	2013	autumn	above	HJ19		F	J	Y	0	0	0	0	0	0	0.4	0	0	0	0	0	0	0.1	0	0.1	0	0	0	0
TA386	north	hjs	large screen	1225	11	4	2013	autumn	above	HJ35		F	J	Y	0	0	0	0	0.3	0	0.1	0	0	0	0	0	0	0	0.1	0	0	0	0	0
TA387	north	hjs	large screen	1225	13	4	2013	autumn	above	HJ35	DB288	F	J	Y	0	0	0	0	0	0	0	0	0	0	0	0	0	0	0	0	0	0	0	0
TA388	north	hjs	large screen	1225	17	4	2013	autumn	above	HJ35		F	J	Y	0	0	0	0	0	0	0.3	0	0	0	0	0	0	0	0	0	0	0	0	0
TA389	north	hjs	large screen	1225	13	4	2013	autumn	above	HJ35		F	J	Y	0	0	0	0	0	0	0	0	0	0	0	0	0	0.4	0.6	0.4	0	0	0	0
TA51	north	snow	srh	1488.5	19	4	2012	autumn	above	B4	4350	F	A	OIL	0	0	0	0	0	0	0	0	0	0	0	1	0	0	0	0	0	0	0	0
TA52	north	snow		1488.5	13	4	2010	autumn	above	A13	4545	M		Y	0	0	0	0	0.5	0	0	0	0	0	0	0	0	0.2	0	0	0	0	0	0
TA76	north	hjs		1225	16	3	2013	autumn	above	HJ31	T14	F	J		0	0	0	0	0	0	0	0	0	0	0	0	0	0.3	0.6	0.3	0	0	0	0
TA77	north	hjs		1225	15	3	2013	autumn	above	HJ35	T17	F	J		0	0	0	0	0	0	0.1	0	0	0	0.1	0	0	0.2	0.5	0.2	0	0	0	0
TA78	north	hjs		1225	16	3	2013	autumn	above	HJ41	1507	M	A		0.1	0	0.4	0	0	0	0.1	0	0.2	0	0	0	0	0	0	0	0	0	0	0
TA79	north	hjs		1225	15	3	2013	autumn	above	HJ35	T12	F	J		0	0	0	0	0	0	0	0	0	0	0	0	0	0	0.3	0	0	0	0	0
TA80	north	hjs		1225	16	3	2013	autumn	above	HJ41	T19	M	J		0	0	0.1	0	0	0	0	0	0	0	0	0	0	0.3	0	0	0	0	0	0
TA81	north	hjs		1225	16	3	2013	autumn	above	HJ41	T19	F	J		0.2	0	0.5	0	0	0	0	0	0.1	0	0.2	0	0	0	0	0	0	0	0	0
TA82	north	hjs		1225	15	3	2013	autumn	above	HJ35	T22	F	J		0	0	0	0	0	0	0	0	0	0	0	0	0	0	0	0	0	0	0	0
TA94	north	hjs	l screen	1225	17	4	2013	autumn	above	HJ35			J	Y	0	0	0.1	0	0	0	0	0	0.1	0	0.1	0	0	0	0	0	0	0	0	0
TA95	north	hjs	l screen	1225	13	4	2013	autumn	above	HJ35		F	J	Y	0	0	0	0	0	0	0	0	0	0	0	0	0	0	0	0	0	0	0	0
TA96	north	hjs	spoil	1225	15	4	2013	autumn	above	HJ19	T59	F	J	Y	0	0	0	0	0	0	0	0	0.2	0	0	0	0	0	0	0	0	0	0	0
TA97	north	hjs	spoil	1225	14	4	2013	autumn	above	HJ19		F	A	Y	0.1	0	0.3	0	0.4	0	0.1	0	0	0	0	0	0	0.1	0	0	0	0	0	0
TA98	north	hjs	l screen	1225	13	4	2013	autumn	above	HJ35	T24	F	J	Y	0	0	0	0	0	0	0	0	0	0	0	0	0	0	0	0	0	0	0	0
TA99	north	hjs	l screen	1225	13	4	2013	autumn	above	HJ35		F	J	Y	0	0	0	0	0	0	0.1	0	0	0	0	0	0	0	0	0	0	0	0	0
TA1	north	snow	srh	1488.5	20	10	2013	spring	above	A6	5140	F	A	Y	0	0.6	0	0	0	0	0	0	0	0	0	0	0	0.2	0	0	0	0	0	0
TA10	north	snow	srh	1488.5	21	10	2013	spring	above	C20	5574	M	J	Y	0	0.2	0.1	0	0	0.2	0	0	0.2	0	0	0	0	0.1	0	0	0	0	0	0
TA11	north	snow	srh	1488.5	25	1	2011	spring	above	B12	4532	M		OIL	0	0	0.2	0	0	0.1	0	0	0.2	0.1	0.1	0	0	0.2	0	0	0	0	0	0
TA12	north	snow	srh	1488.5	25	1	2011	spring	above	A17	4555	F	J	OIL	0	0	0	0	0.1	0.2	0	0	0.5	0	0	0	0	0	0	0	0	0	0	0
TA13	north	snow	srh	1488.5	25	1	2011	spring	above	A39	4414	M	J	OIL	0	0	0	0	0	0	0	0	0.4	0.2	0	0	0	0	0	0	0	0	0	0
TA14	north	snow	srh	1488.5	25	1	2011	spring	above	B41	4546	F	J	OIL	0	0	0	0	0.3	0	0	0	0	0	0	0	0	0.5	0	0	0	0	0	0
TA16	north	bh		1514.5	25	10	2012	spring	above	A53	4709	F			0	0	0.2	0.1	0	0	0	0	0.1	0	0	0	0	0	0	0	0	0	0	0
TA17	north	bh		1514.5	25	10	2012	spring	above	A52	4661	F			0	0	0	0	0	0.1	0	0	0.1	0	0	0	0	0.1	0	0	0	0	0	0
TA18	north	bh		1514.5	24	10	2012	spring	above	A37	5506	F		Y	0	0	0	0	0	0	0	0	0.1	0	0	0	0	0	0	0	0	0	0	0
TA19	north	bh		1514.5	23	10	2012	spring	above	A23	4696	F			0	0	0.2	0	0	0.1	0	0	0.2	0	0	0	0	0.1	0.2	0.1	0	0	0	0
TA2	north	snow	srh	1488.5	20	10	2013	spring	above	B40	4512	F		Y	0	0	0	0.6	0	0.4	0	0	0	0	0	0	0	0	0	0	0	0	0	0
TA20	north	bh		1514.5	24	10	2012	spring	above	A49	5543	F			0	0	0	0	0	0	0	0	0	0	0	0	0	0.2	0.8	0.2	0	0	0	0
TA21	north	bh		1514.5	24	10	2012	spring	above	A37	5502	F		Y	0	0	0	0	0	0	0	0	0.1	0	0	0	0	0	0.1	0	0	0	0	0
TA218	north	hjs	large screen	1225	23	11	2012	spring	above	HJ46	49B9	F		Y	0.1	0	0.3	0	0.1	0.1	0	0	0.2	0	0	0	0	0	0	0	0	0	0	0.1
TA219	north	hjs	above sd	1225	24	11	2012	spring	above	HJ19	4508	M		Y	0	0	0	0	0	0	0	0	0.2	0	0	0	0	0.5	0.3	0.3	0	0	0	0
TA22	north	bh		1514.5	24	10	2012	spring	above	A36	4620	F		Y	0	0	0	0.1	0	0.2	0	0	0.1	0	0.1	0	0	0	0	0	0	0	0	0
TA220	north	hjs	sd4	1225	24	11	2012	spring	above	HJ19	BP10	F		Y	0.2	0	0	0	0.2	0.4	0	0	0.1	0	0	0	0	0.1	0	0.1	0	0	0	0
TA221	north	hjs	large screen	1225	21	11	2012	spring	above	HJ47	DB4FD	F		Y	0.3	0	0	0	0	0.4	0	0	0.2	0	0	0	0	0	0	0	0	0	0	0
TA222	north	hjs	large screen	1225	21	11	2012	spring	above	HJ46	D51AA	F	A	Y	0.2	0	0.1	0	0	0.2	0.1	0	0.1	0	0	0	0	0	0	0	0	0	0	0
TA223	north	hjs	large screen	1225	21	11	2012	spring	above	HJ46	4786	M	A	Y	0	0	0	0	0	0	0	0	0	0	0	0	0	0	0	0	0	0	0	0
TA224	north	hjs		1225	21	11	2012	spring	above	HJ35	4970	F	J	Y	0.2	0	0	0	0	0.2	0	0	0.2	0	0.1	0	0	0.3	0	0	0	0	0	0
TA225	north	hjs		1225	23	11	2012	spring	above	hj35				Y	0	0	0	0	0	0	0.1	0	0	0	0	0	0	0	0	0	0	0	0	0.3
TA226	north	hjs		1225	21	11	2012	spring	above	HJ35	4805	M		Y	0	0	0	0	0	0.1	0.1	0	0.1	0	0	0	0	0	0	0	0	0	0	0.1
TA227	north	hjs	large screen	1225	21	11	2012	spring	above	HJ27	4597	F		Y	0	0	0	0	0.2	0.7	0	0	0	0	0.1	0	0	0	0	0	0	0	0	0
TA228	north	hjs	large screen	1225	21	11	2012	spring	above	HJ27	D3252	F		Y	0.9	0	0	0	0.1	0	0	0	0	0	0	0	0	0	0	0	0	0	0	0
TA229	north	hjs	s end	1225	24	11	2012	spring	above	SD4	D94C9	F		Y	0	0	0	0	0	0.1	0	0	0.1	0	0	0	0	0.2	0	0	0	0	0	0
TA23	north	bh		1514.5	23	10	2012	spring	above	A6	4718			Y	0	0	0	0.2	0	0.2	0.1	0	0.1	0	0	0	0	0	0	0	0	0	0	0
TA230	north	hjs		1225	21	11	2012	spring	above	HJ35		M		Y	0	0	0.2	0	0	0.1	0.1	0	0.2	0	0	0	0	0	0	0	0	0	0	0
TA231	north	hjs	rce	1225	29	10	2011	spring	above	2A		F	J	Y	0.2	0	0.1	0	0	0	0	0	0.4	0	0	0	0	0	0	0	0	0	0	0
TA232	north	hjs	rce	1225	29	10	2011	spring	above	A8		F	J	Y	0	0	0	0	0.2	0	0.2	0	0	0	0	0.3	0	0	0	0	0	0	0	0
TA233	north	hjs	rcw	1225	29	10	2011	spring	above	11	4832				0.2	0	0.3	0	0.1	0.1	0	0	0	0	0	0.1	0	0	0	0	0	0	0	0.2
TA234	north	hjs		1225	29	10	2011	spring	above	C20		F	J	Y	0.3	0	0	0	0	0	0	0	0.3	0	0	0	0	0.2	0	0	0	0	0	0
TA235	north	hjs		1225	29	10	2011	spring	above	C4		F	A	Y	0	0	0.6	0	0	0	0.3	0	0	0	0.1	0	0	0	0	0	0	0	0	0
TA236	north	hjs	rce	1225	29	10	2011	spring	above	A9		F	A	Y	0	0	0.3	0	0.3	0	0.1	0	0.2	0	0	0	0	0	0	0	0	0	0	0
TA237	north	hjs	rce	1225	28	10	2011	spring	above	18	4791	F	A	Y	0	0	0	0	0	0	0	0	0	0	0	0	0	0	0	0	0	0	0	0
TA238	north	hjs	rce	1225	28	10	2011	spring	above	24	4835	F	J	Y	0	0	0	0	0	0	0.1	0	0	0	0	0	0	0	0	0	0	0	0	0
TA239	north	hjs	rcw	1225	29	10	2011	spring	above	16	4833	M	A	Y	0.1	0	0	0	0.3	0	0.1	0	0.2	0	0	0.2	0	0	0	0	0	0	0	0
TA24	north	bh		1514.5	24	10	2012	spring	above	C5	5508	F		Y	0	0	0	0	0	0	0.1	0	0	0	0	0	0	0	0	0	0	0	0	0
TA240	north	hjs	rce	1225	28	10	2011	spring	above	30	4803	F	J	Y	0	0	0	0	0	0	0	0	0	0	0	0	0	0	0	0	0	0	0	0
TA241	north	hjs		1225	22	11	2014	spring	below	HJ26	D26F8	F	A		0.1	0	0.7	0	0	0	0	0	0	0	0	0	0	0.2	0	0	0	0	0	0
TA242	north	hjs		1225	24	11	2014	spring	below	HJ35	D1C75	M			0.3	0	0	0	0	0	0	0	0.1	0	0	0	0	0	0	0	0	0	0	0
TA243	north	hjs		1225	25	11	2014	spring	below	HJ35	D225D	F	J		0	0	0	0	0	0	0	0	0.2	0	0	0	0	0	0	0	0	0	0	0
TA244	north	hjs		1225	24	11	2014	spring	below	HJ35	DA5AE	M	J		0	0	0	0	0	0	0	0	0	0	0	0	0	0.1	0	0	0	0	0	0
TA245	north	hjs		1225	24	11	2014	spring	below	HJ35	DA816	F	A		0.6	0	0	0	0	0	0	0	0	0	0	0	0	0	0	0	0.1	0	0	0.3
TA246	north	hjs		1225	22	11	2013	spring	below	HJ35	D37B6	F	A		0.1	0	0	0	0	0.1	0	0	0.3	0	0	0	0	0.2	0.3	0.2	0	0	0	0
TA247	north	hjs		1225	23	11	2014	spring	below	HJ26	D26F8	F	A		0.3	0	0.4	0	0	0	0	0	0.2	0	0.1	0	0	0	0	0	0	0	0	0
TA248	north	hjs		1225	24	11	2014	spring	below	HJ35	D1F15	F	A		0	0	0	0.3	0	0	0	0	0	0	0	0	0	0	0	0	0	0	0	0
TA249	north	hjs		1225	22	11	2014	spring	below	HJ35	D1C75	M			0	0	0.4	0	0	0.6	0	0	0	0	0	0	0	0	0	0	0	0	0	0
TA25	north	bh		1514.5	25	10	2012	spring	above	C12	5535	M		Y	0	0.1	0	0.2	0	0.5	0.1	0	0	0	0	0	0	0	0	0	0	0	0	0
TA250	north	rc	rce	1617	1	11	2014	spring	below		5564	M	A	Y	0	0	0	0	0	0.2	0.1	0	0	0	0	0	0	0	0	0	0	0	0	0
TA251	north	rc	rce	1617	30	10	2014	spring	below	T17	5571	F	A	Y	0	0	0	0	0	0.3	0	0	0	0.1	0	0	0	0.1	0	0	0	0	0	0
TA252	north	rc	rce	1617	30	10	2014	spring	below	T25	5537	F	J	Y	0	0	0.3	0	0.1	0.1	0	0	0	0	0	0	0	0	0	0	0	0	0	0.2
TA253	north	rc	rce	1617	30	10	2014	spring	below		1965	F	A	Y	0	0	0.1	0	0.5	0	0	0	0	0.2	0	0	0	0	0	0	0	0	0	0.2
TA254	north	rc	rce	1617	28	10	2014	spring	below	T25	4946	F	J	Y	0	0	0.1	0	0	0.3	0	0	0.1	0	0	0	0	0	0	0	0	0	0	0
TA255	north	rc	rce	1617	28	10	2013	spring	below	T2	4858	F		Y	0	0	0	0	0	0	0	0	0	0	0	0	0	0	0	0	0	0	0	0
TA256	north	rc	rce	1617	28	10	2014	spring	below	T22	4995	F	J	Y	0	0	0	0	0	0	0	0	0.2	0.1	0	0	0	0	0	0	0	0	0	0
TA257	north	rc	rce	1617	28	10	2014	spring	below	T12	4768	F	A	Y	0	0	0	0	0	0	0.1	0	0.1	0	0	0	0	0	0	0	0	0	0	0
TA258	north	rc	rce	1617	28	10	2014	spring	below	T5	4928	F	A	Y	0	0	0	0	0.6	0	0	0	0	0	0	0.3	0	0	0	0	0.1	0	0	0
TA259	north	rc	rcem	1617	29	10	2014	spring	below	4				Y	0	0	0	0	0	0.1	0	0	0.2	0	0	0	0	0	0	0	0	0	0	0
TA26	north	bh		1514.5	23	10	2012	spring	above	SITE 15 TRAP 13	4573	F	A	Y	0	0	0	0	0.8	0	0	0	0	0	0	0	0	0	0	0	0	0	0	0
TA260	north	rc	rcw	1617	29	10	2014	spring	below	11		F		Y	0.1	0	0	0	0.1	0.1	0.2	0	0.1	0	0	0	0	0.2	0	0	0	0	0	0
TA261	north	rc	rcm	1617	29	10	2014	spring	below	7		F		Y	0	0	0	0	0	0	0	0	0	0	0	0	0	0	0	0	0	0	0	0
TA262	north	rc	rce	1617	28	10	2014	spring	below	3	4933	M		Y	0	0	0	0	0.4	0.6	0	0	0	0	0	0	0	0	0	0	0	0	0	0
TA263	north	rc	rcm	1617	30	10	2014	spring	below	1	4952	M		Y	0	0	0	0	0.1	0	0	0	0	0	0	0	0	0	0	0	0.4	0	0	0
TA264	north	rc	rce	1617	30	10	2014	spring	below	30	5556	F	J	Y	0	0	0	0	0	0	0	0	0	0	0	0	0	0	0	0	0	0	0	0
TA265	north	rc	rce	1617	30	10	2014	spring	below	T4	5539	M	J	Y	0	0	0.1	0	0	0	0.2	0	0.1	0	0	0	0	0	0	0	0	0	0	0
TA266	north	rc	rce	1617	30	10	2014	spring	below	T24	5579	M	A	Y	0	0	0	0	0	0.4	0	0	0	0.1	0	0	0	0	0	0	0	0	0	0
TA267	north	rc	rce	1617	30	10	2014	spring	below	T16	5550	F	J	Y	0	0	0	0.2	0	0.3	0	0	0	0	0	0	0	0	0	0	0	0	0	0
TA268	north	rc	rce	1617	31	10	2014	spring	below	T21	5557	M		Y	0	0	0	0	0	0	0	0	0	0	0	0	0	0	0	0	0	0	0	0
TA269	north	rc	rce	1617	31	10	2014	spring	below	T15		M		Y	0	0	0	0	0	0	0	0	0	0	0	0	0	0	0	0	0	0	0	0
TA27	north	bh		1514.5	23	10	2012	spring	above	SITE 15 B4	4528	F	J	Y	0	0	0	0	0.8	0	0.2	0	0	0	0	0	0	0	0	0	0	0	0	0
TA270	north	rc	rcem	1617	31	10	2014	spring	below	T5		M		Y	0	0	0	0	0	0	0.1	0	0.1	0	0	0	0	0	0	0	0	0	0	0
TA271	north	rc	rce	1617	28	10	2014	spring	below	T16	4947	F	A	Y	0	0	0	0	0	0	0.4	0	0.2	0	0	0	0	0	0	0	0	0	0	0
TA272	north	rc	rce	1617	30	10	2014	spring	below	T22	2109	F	A	Y	0	0	0	0	0	0	0	0	0	0	0	0	0	0	0	0	0	0	0	0
TA273	north	rc	rcem	1617	31	10	2014	spring	below	T17	4712	F		Y	0	0	0.1	0	0	0.1	0.2	0	0	0.1	0	0	0	0	0	0	0.3	0	0	0
TA274	north	rc	rcem	1617	30	10	2014	spring	below	T7	4889	F		Y	0	0	0	0	0.5	0	0.4	0	0	0	0	0	0	0	0	0	0	0.1	0	0
TA275	north	rc	rce	1617	31	10	2014	spring	below	T1	5577	F		Y	0	0	0.3	0.3	0	0	0	0	0	0	0	0	0	0	0	0	0.1	0	0	0
TA276	north	rc	rcem	1617	31	10	2014	spring	below	T25	5561	F		Y	0.1	0	0	0	0	0.2	0.3	0	0.2	0	0	0	0	0	0	0	0	0	0	0
TA277	north	rc	rce	1617	31	10	2014	spring	below	T22	5547	F		Y	0	0	0	0	0	0	0	0	0	0	0	0	0	0	0	0	0	0	0	0
TA278	north	rc	rce	1617	31	10	2014	spring	below	T3	5575	F		Y	0.4	0	0	0	0	0	0	0	0.2	0	0	0	0	0	0	0	0	0	0	0.2
TA279	north	rc	rce	1617	31	10	2014	spring	below	T9	5551	F		Y	0	0	0	0	0	1	0	0	0	0	0	0	0	0	0	0	0	0	0	0
TA28	north	bh		1514.5	22	10	2012	spring	above	SITE 22 ?4	4539	F	J	Y	0	0	0	0	0	0.2	0	0	0.1	0	0.1	0	0	0	0	0	0	0	0	0
TA280	north	rc	rce	1617	31	10	2014	spring	below	T31	5529	F		Y	0	0	0	0	0	0	0.2	0	0.1	0	0	0	0	0	0	0	0	0	0	0
TA281	north	rc	rce	1617	31	10	2014	spring	below	T24	5511	F		Y	0	0	0	0.4	0	0.1	0	0	0	0	0	0	0	0	0	0	0	0	0	0
TA282	north	rc	rce	1617	30	10	2014	spring	below		5546	F	A	Y	0	0	0.1	0	0	0	0	0	0.3	0	0	0.5	0	0	0	0	0.1	0	0	0
TA283	north	rc	rcm	1617	30	10	2014	spring	below	T10	4957	F		Y	0	0	0	0	0	0.2	0.2	0	0.5	0	0	0	0	0	0	0	0	0	0	0
TA284	north	rc	rcem	1617	31	10	2014	spring	below	T24	4975	F		Y	0	0	0	0	0	0.3	0	0	0.1	0	0	0	0	0	0	0	0	0	0	0
TA285	north	rc	rce	1617	31	10	2014	spring	below	T11	5523			Y	0	0	0	0.7	0	0.2	0	0	0	0	0	0	0	0	0	0	0	0	0	0
TA289	north	rc	rce	1617	27	10	2011	spring	above		4849	F	A	N	0	0	0	0	0	0	0	0	0.3	0	0.1	0	0	0	0	0	0	0	0	0
TA29	north	bh		1514.5	23	10	2012	spring	above	SITE 15 TRAP 13	4573	F	A	Y	0	0	0	0	0	0	0.1	0	0	0	0	0	0	0	0	0	0	0	0	0
TA290	north	rc	rce	1617	27	10	2011	spring	above		4843	F	A	N	0.2	0	0	0	0	0	0.3	0	0.3	0	0	0.2	0	0	0	0	0	0	0	0
TA291	north	rc	rcc	1617	27	10	2011	spring	above	C23	4804	F		N	0.1	0	0	0.1	0.1	0.2	0	0	0	0.2	0	0	0	0	0	0	0	0	0	0
TA292	north	rc	rcc	1617	27	10	2011	spring	above	C7	4794	F		N	0	0	0	0.5	0	0.2	0	0	0.1	0	0	0	0	0	0	0	0	0	0	0
TA293	north	rc	rce	1617	27	10	2011	spring	above		4435			N	0	0	0.5	0	0.1	0	0	0	0.1	0	0.1	0	0	0	0	0	0	0	0	0
TA294	north	snow	srh	1488.5	25	10	2011	spring	above	B36	4235	F		Y	0	0	0	0.2	0	0.4	0	0	0	0	0.1	0	0	0.2	0	0	0	0	0	0
TA295	north	snow	srh	1488.5	26	10	2011	spring	above	B42	4805	M		Y	0	0.3	0	0	0	0.4	0.2	0	0	0	0	0	0	0	0	0	0	0	0	0
TA296	north	snow	srh	1488.5	26	10	2011	spring	above	A8	4850	F	A	Y	0	0.2	0.3	0	0	0.2	0.2	0	0	0	0	0	0	0	0	0	0	0	0	0
TA297	north	snow	srh	1488.5	25	10	2011	spring	above	A24	4635	M	A	Y	0	0.1	0.1	0	0	0.6	0.1	0	0	0	0	0	0	0	0	0	0	0	0	0
TA298	north	snow	srh	1488.5	26	10	2011	spring	above	A17	4828	F	J	Y	0	0	0	0	0	0.1	0.1	0	0	0	0	0	0	0.3	0.6	0.3	0	0	0	0
TA299	north	snow	srh	1488.5	26	10	2011	spring	above	A5	4754	M	J	Y	0	0	1	0	0	0	0	0	0	0	0	0	0	0	0	0	0	0	0	0
TA3	north	snow	srh	1488.5	20	10	2013	spring	above	A8	2112	M	A	Y	0	0.1	0	0	0	0.1	0.2	0	0.1	0	0	0	0	0	0	0	0	0	0	0
TA300	north	snow	srh	1488.5	25	10	2011	spring	above	A33	4526	M	J	Y	0	0	0.2	0	0	0	0.3	0	0	0	0	0	0	0	0	0	0.1	0	0	0
TA301	north	snow	srh	1488.5	26	10	2011	spring	above	A33	4860	M	J	Y	0	0	0	0	0	0.2	0	0	0	0	0	0	0	0	0	0	0	0	0	0
TA302	north	snow	srh	1488.5	26	10	2011	spring	above	B43	4745	M		Y	0.1	0	0	0	0.1	0.1	0.1	0	0.4	0	0.1	0	0	0	0	0	0	0	0	0
TA303	north	snow	srh	1488.5	25	10	2011	spring	above	B42	4275	M		Y	0	0	0.4	0	0	0	0.4	0	0	0	0	0	0	0.1	0	0	0	0	0	0
TA304	north	snow	srh	1488.5	25	10	2011	spring	above	A29	4772	F	A	Y	0	0	0.1	0	0.7	0	0.1	0	0	0	0	0.1	0	0	0	0	0	0	0	0
TA305	north	snow	srh	1488.5	25	10	2011	spring	above	B44	367	F		Y	0.2	0	0	0	0	0	0.2	0	0	0	0.2	0	0	0.1	0	0.1	0	0	0	0
TA306	north	snow	srh	1488.5	25	10	2011	spring	above	B29	5006	F		Y	0	0	0	0	0	0.1	0	0	0	0	0	0	0	0.2	0.4	0.2	0	0	0	0
TA307	north	snow	srh	1488.5	26	10	2011	spring	above	A1	4841	F	A	Y	0	0	0.4	0	0	0	0.3	0	0	0	0	0	0.2	0	0	0	0	0	0	0
TA308	north	snow	srh	1488.5	27	10	2011	spring	above	A30	4807	F	J	Y	0	0	0.2	0	0.2	0	0.5	0	0	0	0	0	0	0	0	0	0	0.1	0	0
TA309	north	snow	srh	1488.5	25	10	2011	spring	above	B15	4350	F		Y	0	0	0	0	0	0.2	0.1	0	0.2	0	0	0	0	0	0	0	0	0	0	0
TA310	north	snow	srh	1488.5	26	10	2011	spring	above	B42	4805	M		Y	0	0	0	0	0	0.3	0	0	0	0	0	0	0.1	0	0	0	0	0	0	0
TA311	north	snow	srh	1488.5	26	10	2011	spring	above	B4	4795	F		Y	0	0	0	0	0.4	0.2	0	0	0	0	0	0	0	0.2	0	0	0	0	0	0
TA312	north	snow	srh	1488.5	25	10	2011	spring	above	B37	4628	F		Y	0.1	0	0.1	0	0	0.1	0	0	0	0	0.6	0	0	0.1	0	0	0	0	0	0
TA313	north	snow	srh	1488.5	25	10	2011	spring	above	B41	398			Y	0	0	0.2	0	0	0	0	0	0	0	0.2	0	0.1	0	0	0	0	0	0	0
TA314	north	snow	srh	1488.5	25	10	2011	spring	above	C14	4762	F	J	Y	0	0	0	0	1	0	0	0	0	0	0	0	0	0	0	0	0	0	0	0
TA315	north	snow	srh	1488.5	27	10	2011	spring	above	B3	4788	F			0	0.1	0.1	0	0.2	0	0	0	0.2	0	0	0	0	0.1	0	0	0	0	0	0
TA316	north	snow	srh	1488.5	25	10	2011	spring	above	A32	4634	M	A	Y	0	0	0	0	0	0	0	0	0	0	0	0	0	0	0	0	0	0	0	0
TA317	north	snow	srh	1488.5	25	10	2011	spring	above	A27	4757	F	J	Y	0.2	0	0	0	0	0	0	0	0.2	0	0	0	0	0.3	0.3	0.3	0	0	0	0
TA318	north	snow	srh	1488.5	25	10	2011	spring	above	A4	4773	F	A	Y	0	0	0	0	0	0	0	0	0	0	0	0	0	0	0	0	0	0	0	0
TA319	north	snow	srh	1488.5	25	10	2011	spring	above	B4	338	F		Y	0	0	0.3	0	0.4	0.2	0	0	0	0	0	0	0	0.1	0	0	0	0	0	0
TA320	north	snow	srh	1488.5	27	10	2011	spring	above		4829	F	A	Y	0	0	0.3	0	0	0	0	0	0.1	0	0	0	0	0	0	0	0	0	0	0
TA321	north	hjs	sd4	1225	28	10	2011	spring	above	23	4822	F		Y	0	0	0	0	0	0	0	0	0	0	0	0	0	0	0	0	0	0	0	0
TA322	north	hjs	sd4	1225	26	10	2011	spring	above	16	4229	F	A	Y	0	0	0	0	0.1	0	0	0	0	0	0	0	0	0	0	0	0	0	0	0
TA323	north	hjs		1225	26	10	2011	spring	above		4337	M	A	Y	0	0	0	0	0	0.4	0	0	0	0	0	0	0	0.2	0	0	0	0	0	0
TA324	north	hjs	sd1	1225	25	10	2011	spring	above	54	4798	M	A	Y	0.1	0	0.4	0	0.1	0	0	0	0.3	0	0	0	0	0	0	0	0	0	0	0
TA325	north	hjs	sd4	1225	25	10	2011	spring	above	6	4797	F	J	Y	0	0	0	0	0	0	0	0	0	0	0	0	0	0	0	0	0	0	0	0
TA326	north	snow	srh	1488.5	24	10	2011	spring	above	A4	343	F	A	Y	0	0	0.2	0	0	0	0	0	0	0	0	0	0	0.5	0.2	0.3	0	0.1	0	0
TA327	north	snow	srh	1488.5	24	10	2011	spring	above	A23	4420	F	A	N	0	0	0.2	0	0.3	0.1	0.2	0	0	0	0	0.1	0	0.1	0	0	0	0	0	0
TA328	north	snow	srh	1488.5	24	10	2011	spring	above	A11	358	F	A	N	0	0.2	0.1	0.3	0	0.1	0.1	0	0	0	0	0	0	0	0	0	0	0	0	0
TA329	north	snow	srh	1488.5	24	10	2011	spring	above	A26	385	F	A	N	0.2	0	0	0	0	0	0.2	0	0.1	0	0	0	0	0.3	0.2	0.2	0	0	0	0
TA330	north	snow	srh	1488.5	24	10	2011	spring	above	A18	340	F	A	N	0.1	0	0.6	0.2	0	0	0	0	0	0	0	0.1	0	0	0	0	0	0	0	0
TA331	north	snow	srh	1488.5	24	10	2011	spring	above	A7	5140	F	A	N	0	0.2	0	0	0	0.4	0	0	0	0	0	0	0	0.1	0.1	0.1	0	0	0	0
TA332	north	snow	srh	1488.5	24	10	2011	spring	above	A34	350	F	A	N	0	0	0	0	0	0	0.2	0	0	0	0	0	0	0	0	0	0	0	0	0
TA333	north	snow	srh	1488.5	24	10	2011	spring	above	A2	384	F	A	N	0	0.1	0.2	0	0	0.1	0	0	0.1	0	0	0	0	0	0	0	0	0	0	0
TA334	north	snow	srh	1488.5	24	10	2011	spring	above	A22	362	F	A	N	0	0	0.3	0	0	0.7	0	0	0	0	0	0	0	0	0	0	0	0	0	0
TA335	north	snow	srh	1488.5	24	10	2011	spring	above	B1	4776			N	0	0	0.2	0	0.5	0	0	0	0	0	0	0	0	0.1	0.1	0.1	0	0	0	0
TA336	north	snow	srh	1488.5	24	10	2011	spring	above		332	M	A	N	0	0	0.5	0	0	0	0	0	0.1	0	0	0	0	0	0	0	0	0	0	0
TA337	north	snow	srr	1488.5	24	10	2011	spring	above	A20	4473	F		Y	0	0	0	0	0	0.1	0.1	0	0.1	0	0	0	0	0	0	0	0	0	0	0
TA338	north	snow	srr	1488.5	24	10	2011	spring	above	A21	4634	M		Y	0	0	0	0	0	0	0.2	0	0.1	0	0	0	0	0	0	0	0	0	0	0
TA339	north	snow	srr	1488.5	25	10	2011	spring	above	A6	4729	M	A	Y	0	0	0	0	0	0.1	0	0	0	0	0	0	0	0	0	0	0	0	0	0
TA340	north	snow	srr	1488.5	26	10	2011	spring	above	C14		F	A	Y	0	0	0.2	0	0	0	0	0	0.1	0	0.2	0	0	0	0	0	0	0	0	0
TA341	north	snow	srr	1488.5	24	10	2011	spring	above	B3	4246	F	A	Y	0	0	0	0	0	1	0	0	0	0	0	0	0	0	0	0	0	0	0	0
TA342	north	snow	srr	1488.5	24	10	2011	spring	above	A19	4755	F		Y	0	0	0.3	0	0.4	0	0	0	0	0	0	0	0	0.1	0	0	0.1	0	0	0
TA343	north	snow	srr	1488.5	26	10	2011	spring	above	A15		F	A	Y	0.1	0	0.2	0	0	0	0.4	0	0.1	0	0.2	0	0	0	0	0	0	0	0	0
TA344	north	snow	srr	1488.5	24	10	2011	spring	above	A18	4761	F		Y	0	0.1	0.1	0	0	0	0.3	0	0.2	0	0	0	0	0	0	0	0	0	0	0
TA345	north	snow	srr	1488.5	25	10	2011	spring	above	A15	4783	F	A	Y	0	0	0.2	0.1	0	0.2	0	0	0.1	0	0.1	0	0	0.2	0	0	0	0	0	0
TA346	north	snow	srr	1488.5	26	10	2011	spring	above	B1		F	J	Y	0	0	0	0	0.2	0.3	0.2	0	0	0	0	0	0.1	0.1	0	0	0	0	0	0
TA347	north	snow	srr	1488.5	26	10	2011	spring	above	C6		F	A	Y	0	0	0	0	0	0.3	0.1	0	0	0	0	0	0	0.1	0	0	0.1	0	0	0
TA348	north	snow	srr	1488.5	24	10	2011	spring	above	A18	4758	F		Y	0	0	0.2	0	0	0	0	0	0	0	0	0	0	0.3	0	0	0	0	0	0
TA349	north	snow	srr	1488.5	24	10	2011	spring	above	A6	4633			Y	0	0	0.1	0	0	0.2	0.2	0	0	0	0	0	0	0	0	0	0.1	0	0	0.2
TA350	north	snow	srr	1488.5	25	10	2011	spring	above	C10	4789	F	J	Y	0	0	0	0	0.1	0	0.1	0	0.1	0	0	0	0	0	0	0	0	0	0	0
TA351	north	snow	srr	1488.5	25	10	2011	spring	above	B1	4780	F	A	Y	0	0	0	0	0	0	0.2	0	0	0	0	0	0	0.1	0	0.1	0	0	0	0
TA361	north	snow	srh	1488.5	21	10	2013	spring	above	B29	4255	F		Y	0	0	0.1	0	0.8	0	0	0	0	0	0.1	0	0	0	0	0	0	0	0	0
TA362	north	snow	srh	1488.5	21	10	2013	spring	above	C15	5531	M	J	Y	0	0	0	0	0	0.2	0	0	0.1	0	0.1	0	0	0.3	0	0.3	0	0	0	0
TA363	north	snow	srh	1488.5	20	10	2013	spring	above	B29	335	F		Y	0	0	0	0	0	0	0	0	0	0	0	0	0	0	0	0	0	0	0	0
TA364	north	snow	srh	1488.5	21	10	2013	spring	above	B33	4814	M		Y	0	0	0	0	0	0.3	0	0	0.1	0	0	0	0	0	0	0	0	0	0	0
TA365	north	snow	srh	1488.5	21	10	2013	spring	above	B25	4965	M		Y	0	0	0	0	1	0	0	0	0	0	0	0	0	0	0	0	0	0	0	0
TA366	north	snow	srh	1488.5	21	10	2013	spring	above	B45	4509	M		Y	0	0	0.3	0	0.3	0.1	0	0	0	0	0	0	0	0.1	0.2	0.1	0	0	0	0
TA367	north	snow	srh	1488.5	21	10	2013	spring	above	C12	5563	F	J	Y	0.2	0.2	0.1	0	0	0.1	0.2	0	0	0	0.1	0	0	0	0	0	0	0	0	0
TA368	north	snow	srh	1488.5	21	10	2013	spring	above	C3	5514	M	J	Y	0	0	0	0	0	0	0	0	0	0	0	0	0	0	0	0	0	0	0	0
TA369	north	snow	srh	1488.5	20	10	2013	spring	above	B3	4951	F		Y	0.1	0	0	0	0.3	0.1	0	0	0	0	0	0	0	0	0	0	0	0	0	0
TA370	north	snow	srh	1488.5	20	10	2013	spring	above	B2	4876	F		Y	0	0.3	0	0	0.1	0	0.3	0	0	0	0.1	0	0	0	0	0	0	0	0	0
TA371	north	snow	srh	1488.5	21	10	2013	spring	above	B15	4581	F		Y	0	0	0.1	0	0	0.3	0	0	0	0	0	0.3	0	0.1	0	0.1	0.2	0	0	0
TA372	north	snow	srh	1488.5	20	10	2013	spring	above	B19	4820	F		Y	0	0.1	0	0.4	0.2	0.1	0	0	0.1	0	0	0	0	0	0	0	0	0	0	0
TA373	north	snow	srh	1488.5	21	10	2013	spring	above	A9	5527	M	J	Y	0.3	0	0.1	0	0	0	0	0	0.3	0	0	0	0	0	0	0	0	0	0	0
TA374	north	snow	srh	1488.5	21	10	2013	spring	above	B46	4819	F		Y	0.1	0	0	0	0	0	0.1	0	0	0	0	0	0	0	0	0	0	0	0	0
TA375	north	snow	srh	1488.5	20	10	2013	spring	above	A15	1957	M	A	Y	0	0	0.1	0	0	0.1	0	0	0.1	0	0	0.4	0	0	0	0	0	0	0	0
TA376	north	snow	srh	1488.5	20	10	2013	spring	above	B33	4795	F		Y	0.1	0	0	0	0	0	0	0	0.2	0	0	0	0	0.1	0	0	0.1	0	0	0
TA377	north	snow	srh	1488.5	21	10	2013	spring	above	A15	1908	F	J	Y	0	0	0.2	0	0.2	0.2	0.3	0	0.1	0	0	0	0	0	0	0	0	0	0	0
TA378	north	snow	srh	1488.5	20	10	2013	spring	above	B48	4879	F		Y	0	0	0	0	0	0.6	0.2	0	0	0	0	0	0	0	0	0	0	0	0	0
TA379	north	snow	srh	1488.5	21	10	2013	spring	above	C18	1711	M	J	Y	0	0	0.5	0	0	0.2	0	0	0.1	0	0	0	0	0	0	0	0	0	0	0
TA380	north	snow	srh	1488.5	20	10	2013	spring	above	A10	5509	F	A	Y	0	0	0	0	0	0	0	0	0	0	0	0	0	0	0	0	0	0	0	0
TA381	north	snow	srh	1488.5	20	10	2013	spring	above	B12	4587	M		Y	0	0	0	0	0	0.2	0	0	0	0	0	0	0	0.2	0	0	0.1	0.2	0	0
TA382	north	snow	srh	1488.5	21	10	2013	spring	above	B19	4600	F		Y	0	0	0	0	0.3	0.2	0.1	0	0.1	0	0	0	0	0	0	0	0	0	0	0
TA383	north	snow	srh	1488.5	21	10	2013	spring	above	A2	5519	F	J	Y	0	0.1	0	0	0.1	0.1	0	0	0	0	0	0	0	0.2	0	0	0	0	0	0
TA384	north	snow	srh	1488.5	20	10	2013	spring	above	B43	4893	F		Y	0	0	0	0.3	0	0.3	0.1	0	0.1	0	0	0	0	0	0	0	0	0	0	0
TA390	north	hjs		1225	24	11	2012	spring	above	HJ5	D2656			Y	0	0	0	0	0	0	0.2	0	0	0	0	0	0	0.1	0	0.1	0	0	0	0
TA391	north	hjs		1225	23	11	2012	spring	above	HJ35	4506	M		Y	0	0	0	0	0	0	0	0	0	0	0	0	0	0	0	0	0	0	0	0
TA392	north	hjs		1225	21	11	2012	spring	above	HJ35	4501	F		Y	0.1	0	0	0	0	0.8	0	0	0.1	0	0	0	0	0	0	0	0	0	0	0
TA393	north	hjs		1225	21	11	2012	spring	above	HJ35		M		Y	0	0	0	0	0	0.2	0	0	0.2	0	0	0.1	0	0.1	0	0	0	0	0	0
TA4	north	snow	srh	1488.5	20	10	2013	spring	above	C18	1662	M	A	Y	0.1	0.1	0.2	0	0	0.1	0	0	0.2	0	0	0	0	0	0	0	0	0	0	0
TA411	north	bh		1867	23	10	2012	spring	above	A68	4988	F		Y	0	0	0	0	0	0	0	0	0	0	0	0	0	0	0	0	0	0	0	0
TA412	north	bh		1867	23	10	2012	spring	above	A74	4701	F		Y	0	0	0	0	0	1	0	0	0	0	0	0	0	0	0	0	0	0	0	0
TA413	north	bh		1867	24	10	2012	spring	above	A74	4507	M			0	0	0	0	0	0	0	0	0	0	0	0	0	0.5	0.6	0.5	0	0	0	0
TA414	north	bh		1867	24	10	2012	spring	above	C5	5508	F		Y	0	0	0	0	0	0	0	0	0	0	0	0	0	0	0	0	0	0	0	0
TA415	north	bh		1867	24	10	2012	spring	above	A22	4696	F			0	0	0	0	0	0	0.1	0	0	0	0	0	0	0.1	0.6	0.1	0	0	0	0
TA416	north	bh		1867	25	10	2012	spring	above	A34	4609	F			0	0	0	0	0	1	0	0	0	0	0	0	0	0	0	0	0	0	0	0
TA417	north	bh		1867	23	10	2012	spring	above	A23	4696	F		Y	0	0	0.2	0	0	0	0	0	0	0	0	0	0	0.2	0.6	0.2	0	0	0	0
TA418	north	bh		1867	23	10	2012	spring	above	A70	4573	F		Y	0.1	0.4	0	0	0.4	0	0	0	0	0	0	0	0	0	0	0	0.1	0	0	0
TA419	north	bh		1867	24	10	2012	spring	above	A50	5552	M			0	0	0	0	0	0	0	0	0	0	0	0	0	0	0	0	0	0	0	0
TA420	north	bh		1867	23	10	2012	spring	above	7		F	J	Y	0	0	0	0	0	0.6	0	0	0	0	0	0	0	0	0	0	0	0	0	0
TA421	north	hjs	hj41	1225	23	11	2013	spring	above	T10	D2037	M	J	Y	0	0	0	0	0	0	0	0	0	0	0	0	0	0	0	0	0	0	0	0
TA422	north	hjs	hj26	1225	21	11	2013	spring	above		D8CAB	F	J	Y	0.3	0	0	0	0	0.7	0	0	0	0	0	0	0	0	0	0	0	0	0	0
TA423	north	hjs	hj35	1225	21	11	2013	spring	above	T5	DA816	F	A	Y	0	0	0	0	0	0	0	0	0	0	0	0	0	0	0	0	0	0	0	0
TA424	north	hjs	hj35	1225	21	11	2013	spring	above	T19	DC313	F	A	Y	0.1	0	0	0	0.1	0.5	0	0	0	0	0	0	0	0	0	0	0	0	0	0
TA5	north	snow	srh	1488.5	20	10	2013	spring	above	C13	5565	F		Y	0	0.2	0.2	0	0	0	0.1	0	0.1	0	0.1	0	0	0.1	0	0	0	0	0	0
TA6	north	snow	srh	1488.5	20	10	2013	spring	above	C12	4650	F	A	Y	0.1	0	0.2	0	0	0	0	0	0.1	0	0	0	0	0.3	0	0	0	0	0	0
TA63	north	hjs		1225	19	10	2012	spring	above	HJ35	4502	F			0	0	0	0	0.5	0.5	0	0	0	0	0	0	0	0	0	0	0	0	0	0
TA64	north	hjs		1225	19	10	2012	spring	above	HJ35	4505	M			0	0	0	0	0	0.2	0.2	0	0.2	0	0	0	0	0	0	0	0	0	0	0
TA65	north	hjs		1225	18	10	2012	spring	above	HJ SD 4	4229	F	A		0	0	0.2	0	0	0	0	0	0.6	0	0	0	0	0	0	0	0	0	0	0
TA66	north	hjs		1225	17	10	2012	spring	above	HJ41		M			0.9	0	0	0	0	0	0	0	0	0	0	0.2	0	0	0	0	0	0	0	0
TA67	north	hjs		1225	19	10	2012	spring	above	HJ35	4960	M			0	0	0.5	0	0.2	0	0	0	0	0	0	0	0	0.1	0.2	0.1	0	0	0	0
TA68	north	hjs		1225	18	10	2012	spring	above	HJ SD 4	4963	F	A		0	0	0	0	0.5	0	0	0	0	0	0	0	0	0.1	0.4	0.1	0	0	0	0
TA69	north	hjs		1225	18	10	2012	spring	above	HJ SD 4	4955	F	A		0.2	0	0	0	0	0	0	0	0.5	0	0	0	0	0	0	0	0	0	0	0
TA7	north	snow	srh	1488.5	20	10	2013	spring	above	A17	5533	M	A	Y	0	0	0.1	0	0	0	0	0	0	0	0.1	0.5	0	0	0	0	0	0	0	0
TA70	north	hjs		1225	21	10	2012	spring	above	HJ26	4577	M			0	0	0	0	0.1	0	0.2	0	0	0	0	0	0	0	0	0	0	0	0	0
TA8	north	snow	srh	1488.5	20	10	2013	spring	above	C22	5526	F	A	Y	0.1	0.2	0.2	0.2	0	0.1	0	0	0.1	0	0.1	0	0	0	0	0	0	0	0	0
TA83	north	hjs		1225	23	11	2013	spring	above	HJ41	T14	F	J		0	0	0	0	1	0	0	0	0	0	0	0	0	0	0	0	0	0	0	0
TA84	north	hjs		1225	22	11	2013	spring	above	HJ41	T8	M	A		0	0	0	0	0.8	0	0.2	0	0	0	0	0	0	0	0	0	0	0	0	0
TA85	north	hjs		1225	21	11	2013	spring	above	HJ35	T22	M	A		0.2	0	0	0.3	0	0.3	0	0	0.2	0	0	0	0	0	0	0	0	0	0	0
TA86	north	hjs		1225	21	11	2013	spring	above	HJ19	4822	M	A		0	0	0	0	0	0	0	0	0	0	0	0	0	0	0	0	0	0	0	0
TA87	north	hjs		1225	21	11	2013	spring	above	HJ19	T34	M	A		0	0	0	0	0	0	0	0	0	0	0	0	0	0	0	0	0	0	0	0
TA88	north	hjs		1225	21	11	2013	spring	above	HJ35	T13	F	J		0	0	0	0	0	0	0	0	0.4	0	0	0	0	0	0	0	0	0	0	0
TA89	north	hjs		1225	23	11	2013	spring	above	HJ19	T16	F	A		0	0	0	0	0	0	0	0	0	0	0	0	0	0	0	0	0	0	0	0
TA9	north	snow	srh	1488.5	20	10	2013	spring	above	B40	4886	M		Y	0	0	0	0	0	0	0	0	0.1	0	0.2	0.4	0	0	0	0	0	0	0	0
TA90	north	hjs		1225	24	11	2013	spring	above	HJ05	T8	M	A		0	0	0	0	0	0	0	0	0.3	0	0	0	0	0	0	0	0	0	0	0
TA91	north	hjs		1225	21	11	2013	spring	above	HJ35	4506	M	A		0.5	0	0	0	0	0.2	0	0	0.1	0	0	0	0	0	0	0	0	0	0	0
TA92	north	hjs		1225	24	11	2013	spring	above	HJ35	T18	M	A		0	0	0	0	1	0	0	0	0	0	0	0	0	0	0	0	0	0	0	0
TA93	north	hjs		1225	22	11	2013	spring	above	HJ41	T20	F	A		0	0	0	0.4	0	0	0	0	0.1	0	0	0	0	0	0	0	0	0	0	0
TA206	north	hjs	SD3	1225	13	2	2013	spring	above	16	D2A85	M	J	Y	0.1	0	0	0	0	0	0.5	0	0	0	0	0	0	0	0	0	0	0	0	0
TA207	north	hjs	T21	1225	13	2	2013	spring	above	HJ19	DA42A	M	J		0.1	0	0	0	0.2	0	0.1	0	0.2	0	0	0	0	0	0.4	0	0	0	0	0
TA36	north	rc		1617	13	12	2010	spring	above		4548	F		Y	0.1	0	0	0.1	0	0.1	0	0	0.3	0	0	0	0	0.2	0	0	0	0	0	0
TA37	north	rc		1617	10	12	2010	spring	above	1		F	A	OIL	0.5	0	0.2	0	0	0	0	0	0.1	0	0	0.1	0	0	0	0	0	0	0	0
TA38	north	rc		1617	12	12	2010	spring	above		4538	F		Y	0.1	0	0.3	0	0.3	0	0	0	0	0.3	0	0	0	0	0	0	0	0	0	0
TA39	north	rc		1617	12	12	2010	spring	above		4438	F	A	Y	0	0	0	0	0	0	0	0	0	0	0	0	0	0.1	0	0	0	0	0	0
TA394	north	snow	sr	1488.5	25	1	2011	spring	above	B3	4525	M		N	0	0	0	0	0	1	0	0	0	0	0	0	0	0	0	0	0	0	0	0
TA395	north	snow	sr	1488.5	25	1	2011	spring	above	A40	4408	M	J	N	0	0	0	0	0	0.1	0	0	0	0	0	0	0	0	0	0	0	0	0	0
TA396	north	snow	sr	1488.5	25	1	2011	spring	above	B6	4530	M		Y	0	0	0	0	0	0.2	0	0	0	0	0	0	0	0	0	0	0	0	0	0
TA397	north	snow	sr	1488.5	25	1	2011	spring	above	A15	4561	F	J	Y	0	0	0	0.5	0	0.2	0	0	0	0	0	0	0	0	0	0	0	0	0	0
TA398	north	snow	sr	1488.5	27	1	2011	spring	above	B4	4537	F		Y	0.4	0	0	0	0	0.4	0	0	0	0	0	0	0	0	0	0	0	0	0	0
TA399	north	snow	sr	1488.5	26	1	2011	spring	above	B11	4569	F		Y	0	0	0	0	0	0.3	0	0	0.1	0	0	0	0	0	0	0	0	0	0	0
TA40	north	rc		1617	11	12	2010	spring	above	1	4443	F	A	Y	0	0	0.3	0.2	0	0	0	0	0.2	0	0	0	0	0	0	0	0	0	0	0
TA400	north	snow	sr	1488.5	28	1	2011	spring	above	A18	4640	M	A	Y	0.1	0	0.2	0	0.4	0	0	0	0	0	0	0	0	0.2	0	0	0	0	0	0
TA401	north	snow	sr	1488.5	26	1	2011	spring	above	A40	4556	M	J	Y	0	0	0	0	0	0.1	0	0	0	0	0	0	0	0	0	0	0	0	0	0
TA402	north	snow	sr	1488.5	28	1	2011	spring	above	B12	4421	F		Y	0	0.2	0.2	0	0	0.6	0	0	0	0	0	0	0	0	0	0	0	0	0	0
TA403	north	snow	sr	1488.5	26	1	2011	spring	above	B27	4559	F		Y	0.4	0	0	0	0	0	0	0	0.1	0	0	0	0	0	0.2	0	0	0	0	0.1
TA404	north	snow	sr	1488.5	26	1	2011	spring	above	B12	4563	M		Y	0	0	0	0	0.4	0.5	0.1	0	0	0	0	0	0	0	0	0	0	0	0	0
TA405	north	snow	sr	1488.5	27	1	2011	spring	above	B13	4675	M		Y	0	0	0	0.2	0	0	0	0	0.1	0	0	0	0	0	0	0	0	0	0	0
TA406	north	snow	sr	1488.5	27	1	2011	spring	above	A18	4628	F	A	Y	0	0	0	0	0	0.3	0	0	0	0	0	0	0	0	0	0	0	0	0	0
TA407	north	snow	sr	1488.5	28	1	2011	spring	above	B3	4668	F		Y	0	0	0	0	0	0.5	0	0	0	0	0.2	0	0	0.1	0	0	0	0	0	0
TA408	north	snow	sr	1488.5	27	1	2011	spring	above	B23	4543	F		Y	0	0	0	0	0.4	0	0	0	0	0	0	0	0	0.2	0	0	0	0	0	0
TA409	north	snow	sr	1488.5	27	1	2011	spring	above	A40	4544	M	J	Y	0	0	0	0	0	0.3	0	0	0.1	0	0	0	0	0.2	0	0	0	0	0	0.1
TA41	north	snow		1488.5	26	1	2011	spring	above	B13	4554	M		Y	0	0	0.4	0	0	0	0	0	0.3	0	0	0	0	0	0	0	0	0	0	0
TA410	north	snow	sr	1488.5	26	1	2011	spring	above	B10	4419	F		Y	0	0	0	0	0.2	0.3	0.1	0	0	0	0	0	0	0.1	0	0	0	0	0	0.1
TA42	north	snow		1488.5	26	1	2011	spring	above	B24	4564	F		Y	0.1	0	0	0	0.2	0.1	0.1	0	0	0	0	0	0	0	0	0	0	0	0	0
TA43	north	snow		1488.5	28	1	2011	spring	above	B3	4668	F		Y	0.2	0	0	0	0	0.3	0	0	0.1	0	0	0	0	0	0	0	0	0	0	0
TA44	north	snow		1488.5	26	1	2011	spring	above	B5	4544	M		Y	0	0	0	0	0	0.2	0	0	0	0	0	0	0	0	0	0	0	0	0	0
TA45	north	snow		1488.5	26	1	2011	spring	above	A34	4414	M	J	Y	0.1	0	0.1	0	0	0.2	0	0	0	0.1	0	0	0	0	0	0	0	0	0	0
TA46	north	snow		1488.5	26	1	2011	spring	above	B34	4420	F		Y	0	0	0	0	0	0	0	0	0.1	0	0	0.1	0	0.2	0	0	0	0	0	0
TA47	north	snow		1488.5	27	1	2011	spring	above	A18	4628	F	A	Y	0	0	0.3	0	0	0	0	0	0.4	0	0	0	0	0	0.1	0	0	0	0	0
TA48	north	snow		1488.5	26	1	2011	spring	above	B3	4535	F		Y	0	0	0	0	0	0	0.5	0	0.2	0	0	0	0	0	0	0	0	0	0	0
TA49	north	snow		1488.5	28	1	2011	spring	above	B8	4410	M		Y	0	0	0.6	0	0	0	0	0	0.1	0	0	0	0	0	0	0	0	0	0	0
TA50	north	snow		1488.5	26	1	2011	spring	above	A39	4557	F	A	Y	0	0	0	0	0	0.3	0	0	0.2	0	0	0	0	0	0	0	0	0	0	0
TA53	north	snow		1488.5	13	12	2010	spring	above	A2	4527	F	A		0.1	0	0.4	0	0	0	0	0	0.2	0	0	0	0	0.1	0	0	0	0	0	0
TA54	north	snow		1488.5	13	12	2010	spring	above	B LINE 5	4428				0	0	0.2	0.4	0	0.3	0	0	0	0	0.1	0	0	0	0	0	0	0	0	0
TA55	north	snow		1488.5	13	12	2010	spring	above	C1 BLINE 2?	4379	M	A	Y	0	0	0	0	0	0	0	0	0	0	0	0	0	0	0	0	0	0	0	0
TA56	north	snow		1488.5	11	12	2010	spring	above	A12	4436	F	A	Y	0	0.1	0	0	0	0	0	0	0.1	0	0	0	0	0	0	0	0	0	0	0
TA57	north	snow		1488.5	13	12	2010	spring	above	B5	4526	M	J		0.3	0	0	0	0	0	0.1	0	0.3	0	0	0	0	0	0	0	0	0	0	0
TA58	north	snow		1488.5	13	12	2010	spring	above	A7	4531	M	J		0	0	0	0	0	0.1	0	0	0.3	0	0	0	0	0	0	0	0	0	0	0
TA59	north	snow		1488.5	11	12	2010	spring	above	A13	4450	M		Y	0	0	0	0.2	0	0	0	0	0	0	0	0	0	0	0	0	0	0.2	0	0
TA60	north	snow		1488.5	12	12	2010	spring	above	A13	4434	M		Y	0	0	0.1	0	0.8	0	0.1	0	0	0	0	0	0	0	0	0	0	0	0	0
TA61	north	snow		1488.5	12	12	2010	spring	above	A LINE 7	4430	M	J	Y	0	0	0	0	0	0	0	0	0	0	0	0	0	0	0	0	0	0	0	0
TA62	north	snow		1488.5	11	12	2010	spring	above	B LINE 7	4437	M	J	Y	0	0	0	0	0	0.2	0	0	0.2	0	0	0	0	0	0	0	0.1	0	0	0
TA71	north	hjs		1225	28	1	2011	spring	above	HJ26		M	J	Y	0	0	0	0	0	0	0	0	0.2	0	0	0	0	0.5	0	0	0	0	0	0
TA72	north	hjs		1225	27	1	2011	spring	above	HJ26		F	J	Y	0	0	0	0	0	0	0	0	0.2	0	0	0	0	0.8	0	0	0	0	0	0
TA73	north	hjs		1225	27	1	2011	spring	above	HJ26		M		Y	0	0	0	0	0	0	0	0	0	0	0	0	0	0	0	0	0	0	0	0
TA74	north	hjs		1225	28	1	2011	spring	above	HJ28		M	J	Y	0	0	0	0	0	0	0	0	0	0	0	0	0	0.6	0	0	0	0	0	0
TA75	north	hjs		1225	25	1	2011	spring	above	HJ27		F	A	Y	0	0	0	0	0	0	0	0	0	0	0	0	0	1	0	0	0	0	0	0
